# Supplementary figures and images for: Limited random walk algorithm for big graph data clustering
Source: Springer Nature journal article supplement (doi:10.1186/s40537-016-0060-5), 2016-11-30

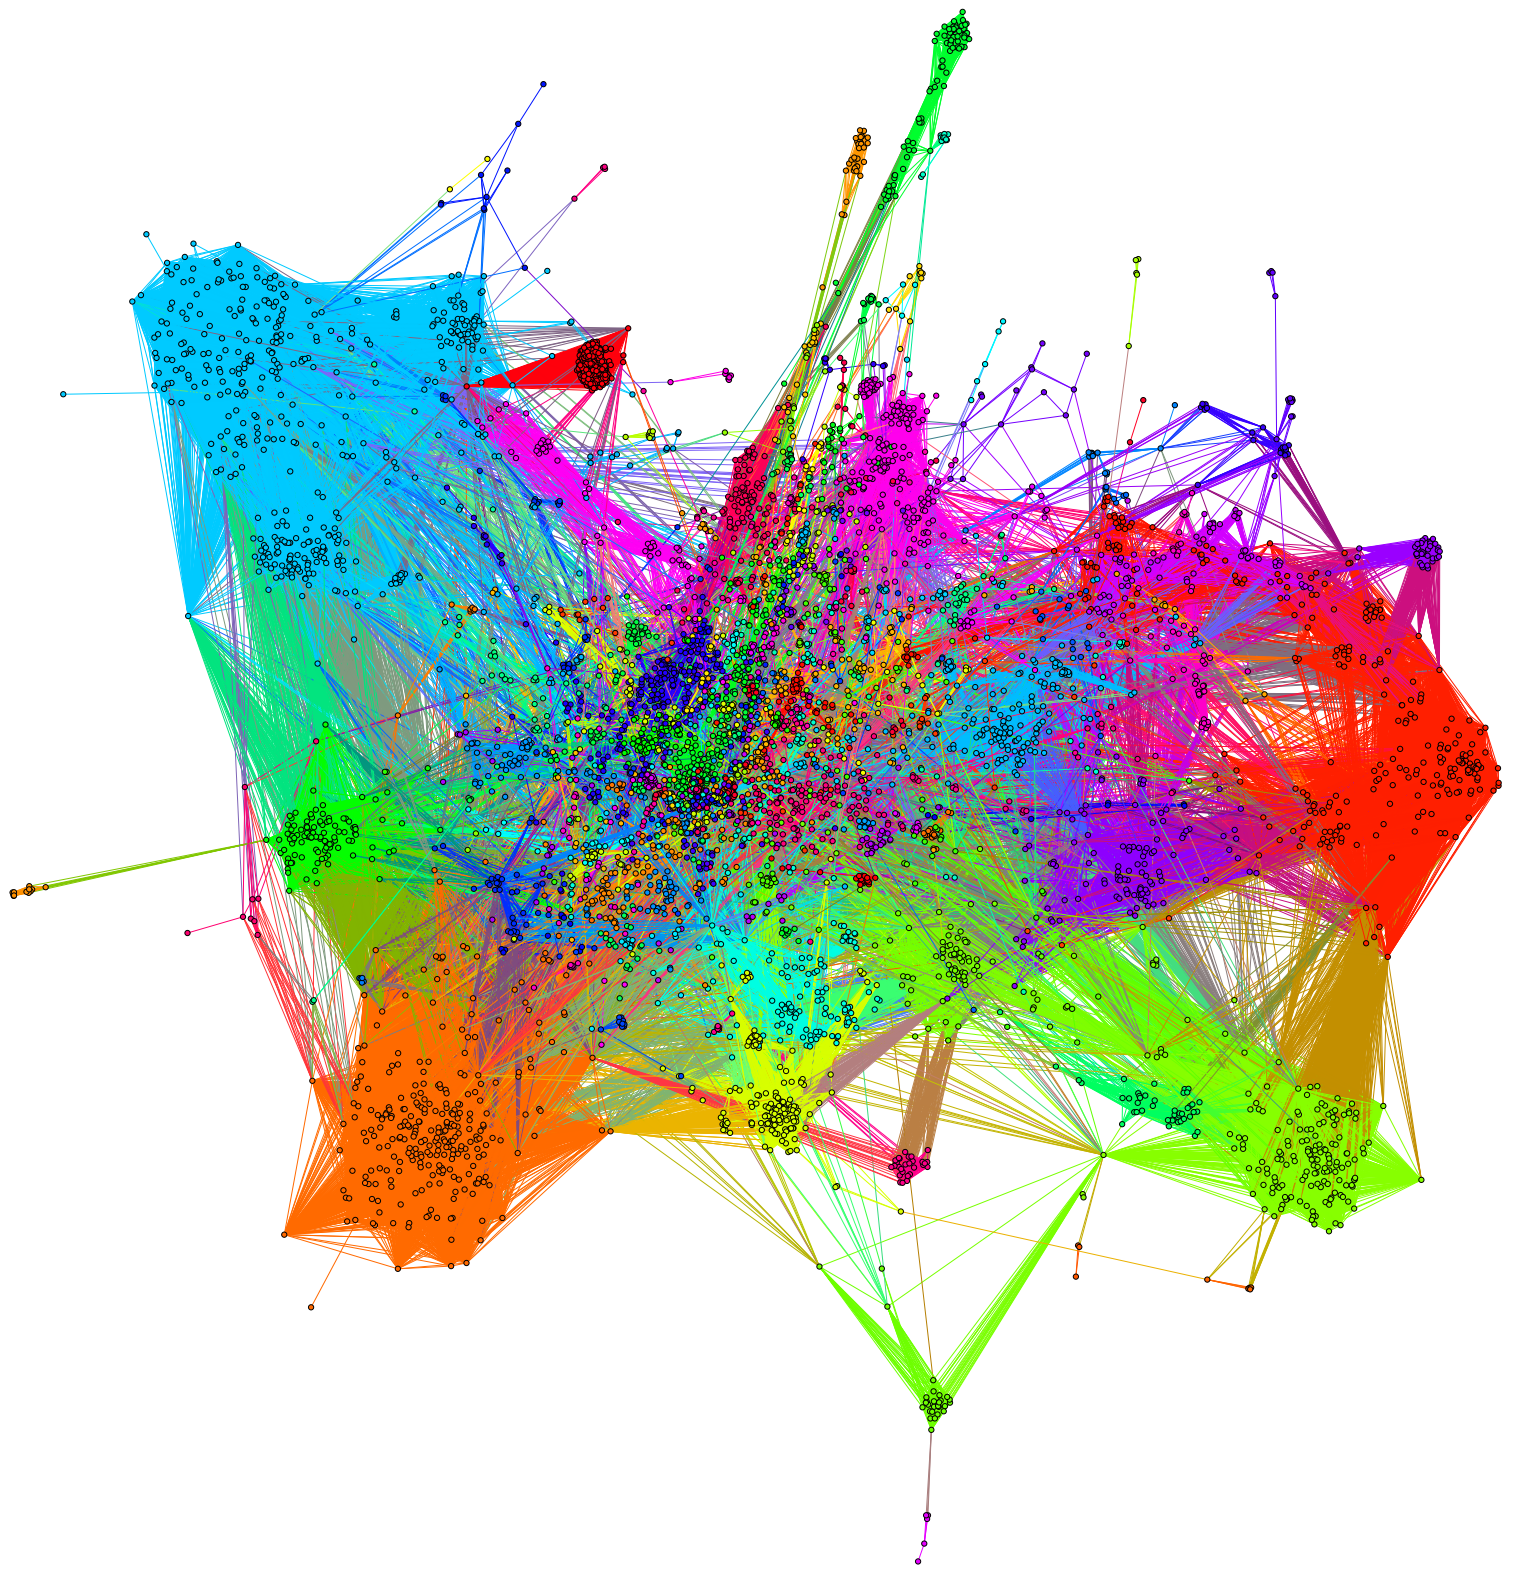

Supplement: MOESM1 [file 11901716]

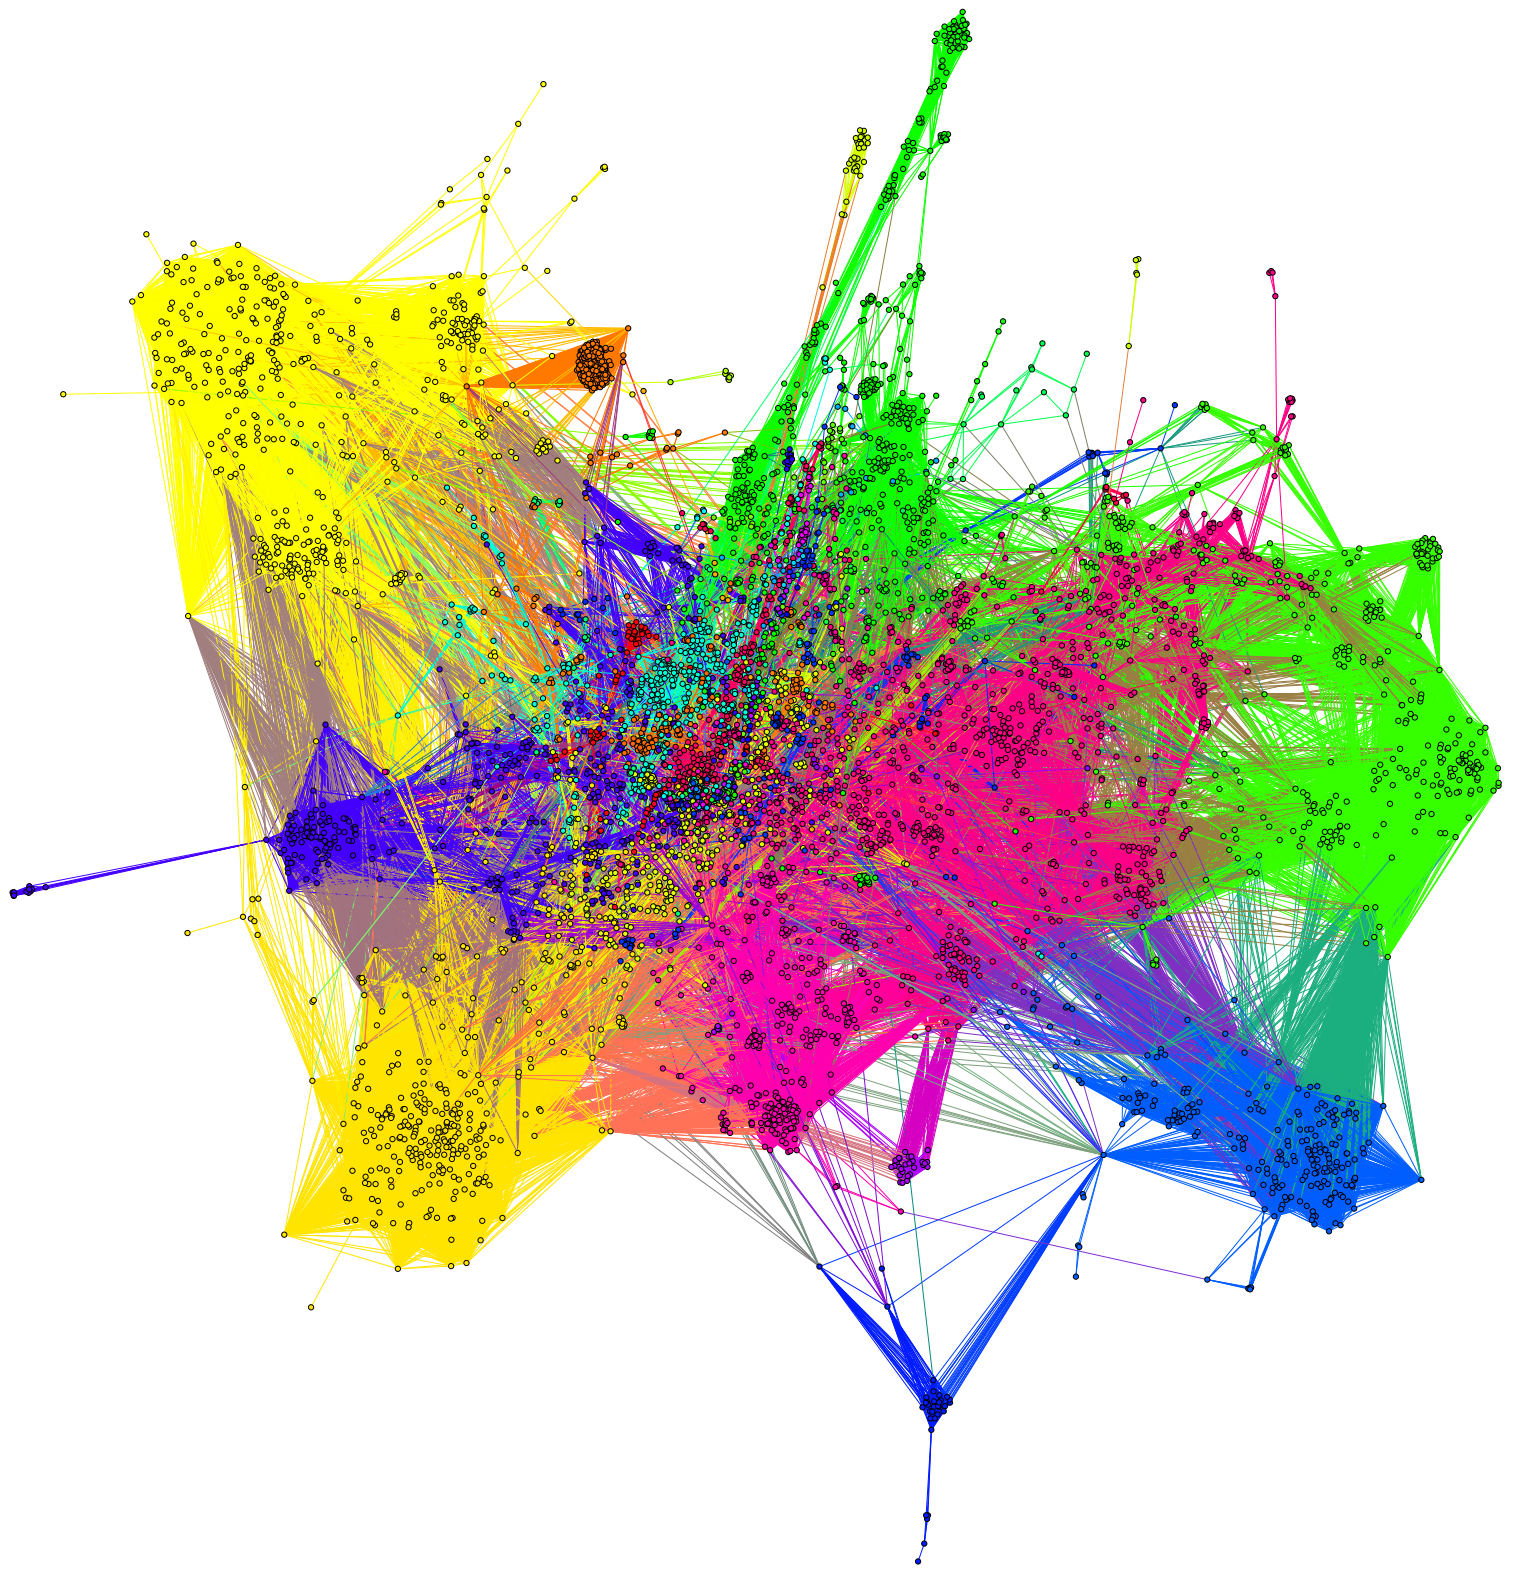

Supplement: MOESM1 [file 11901716]

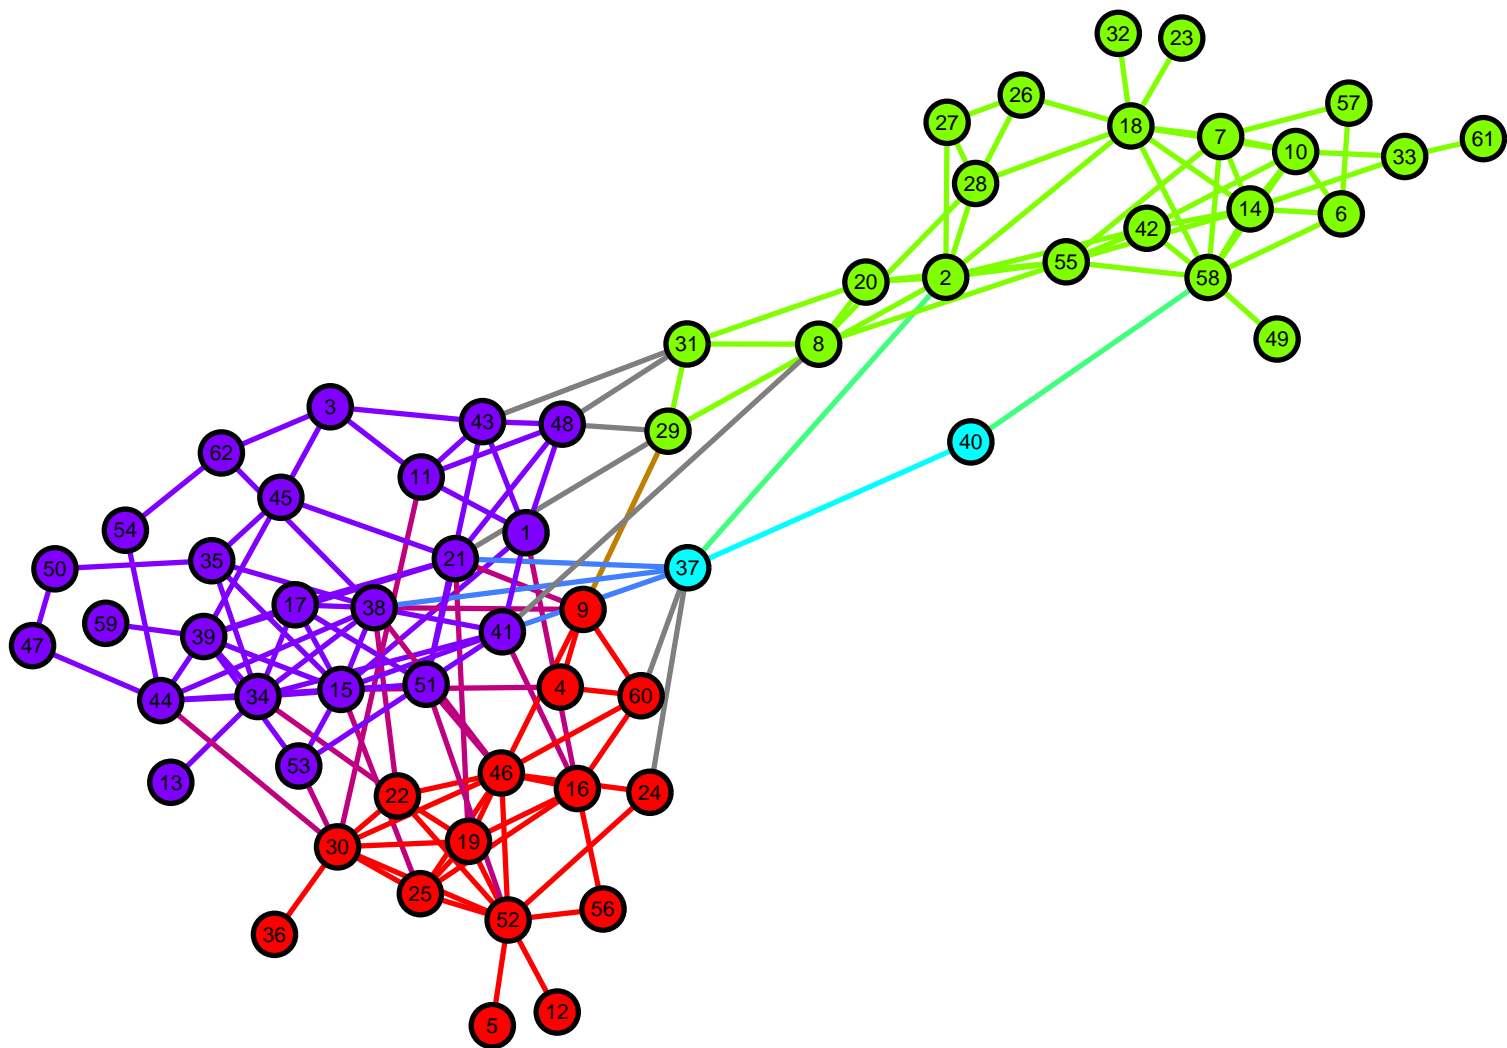

Supplement: MOESM1 [file 11901716]

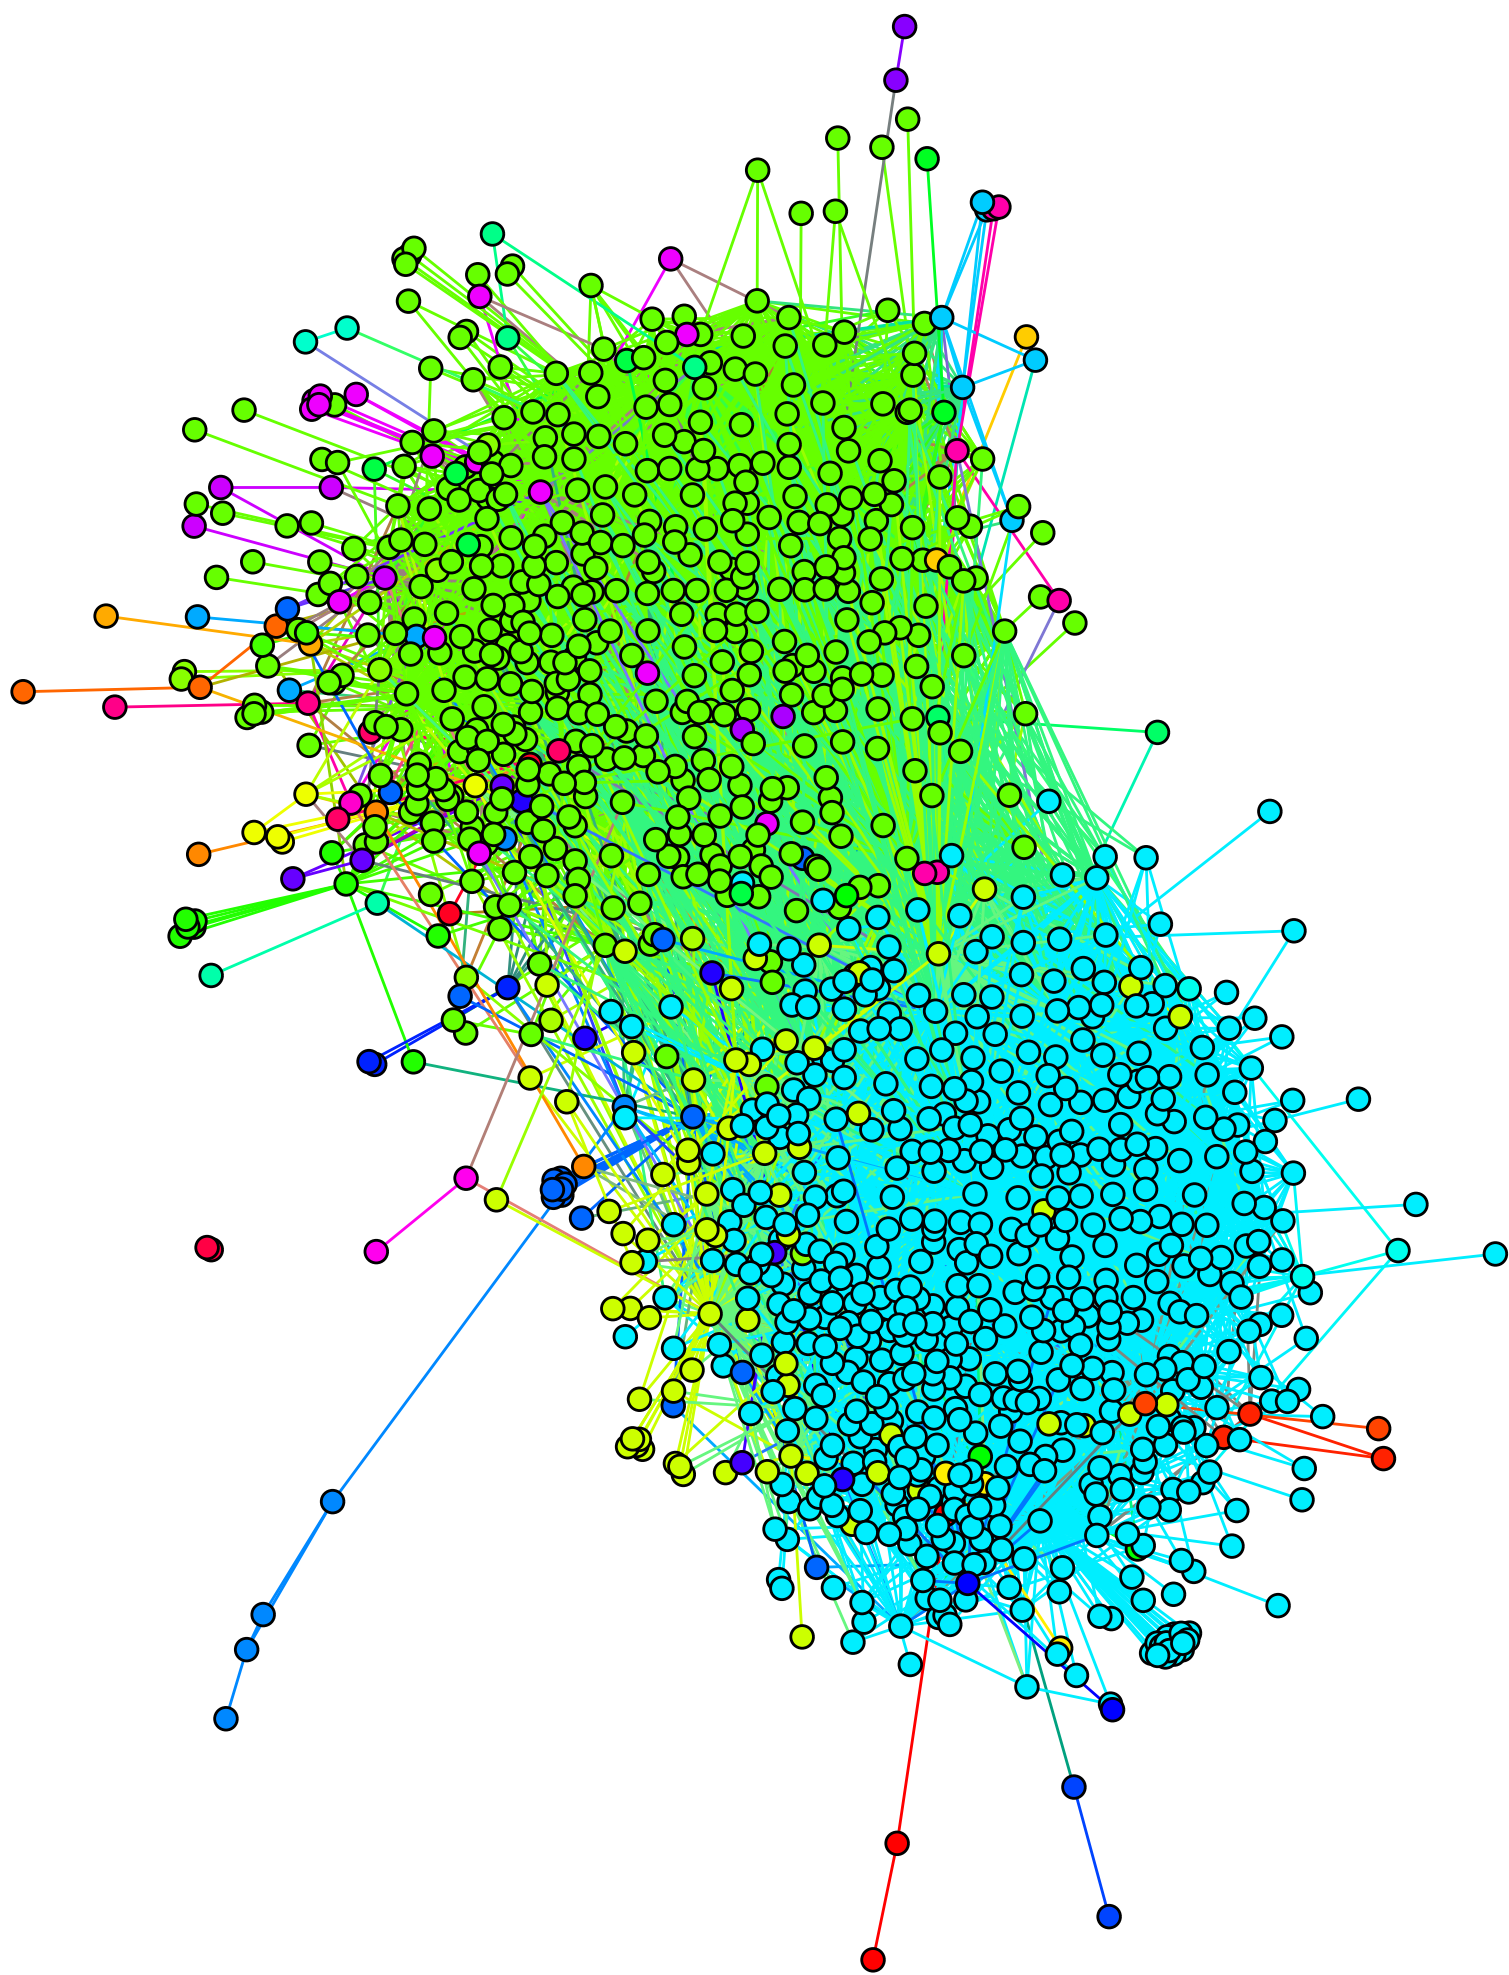

Supplement: MOESM1 [file 11901716]

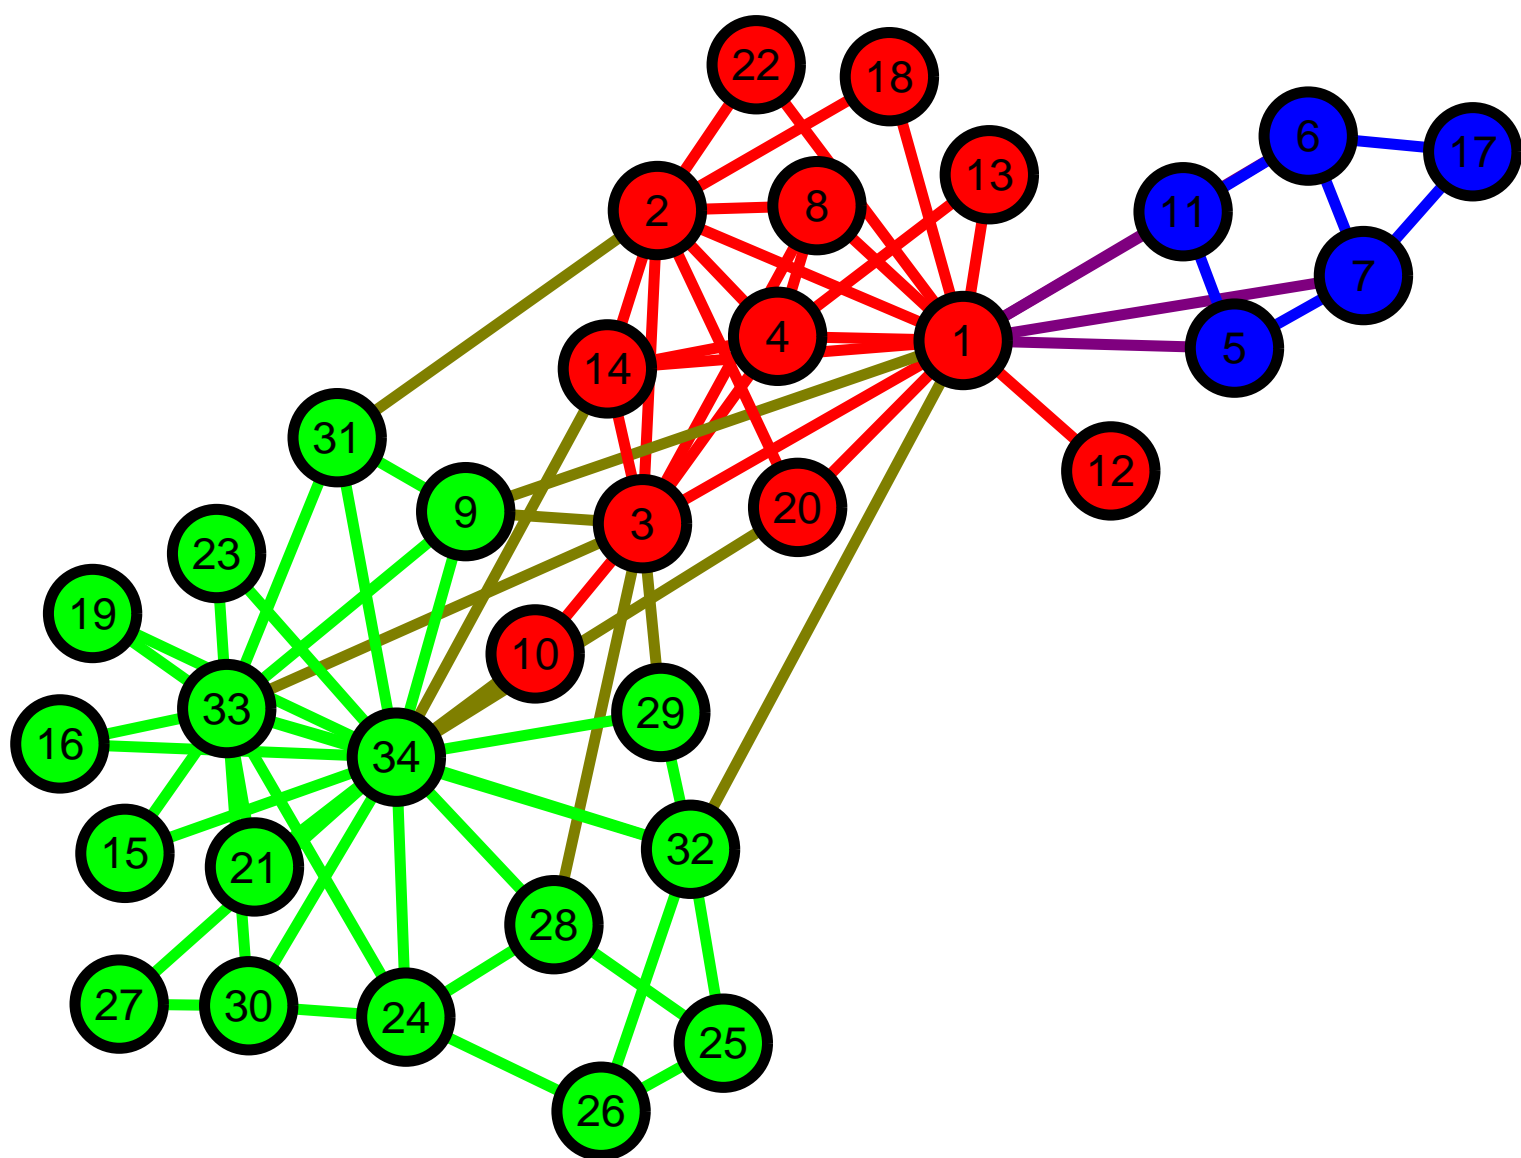

Supplement: MOESM1 [file 11901716]

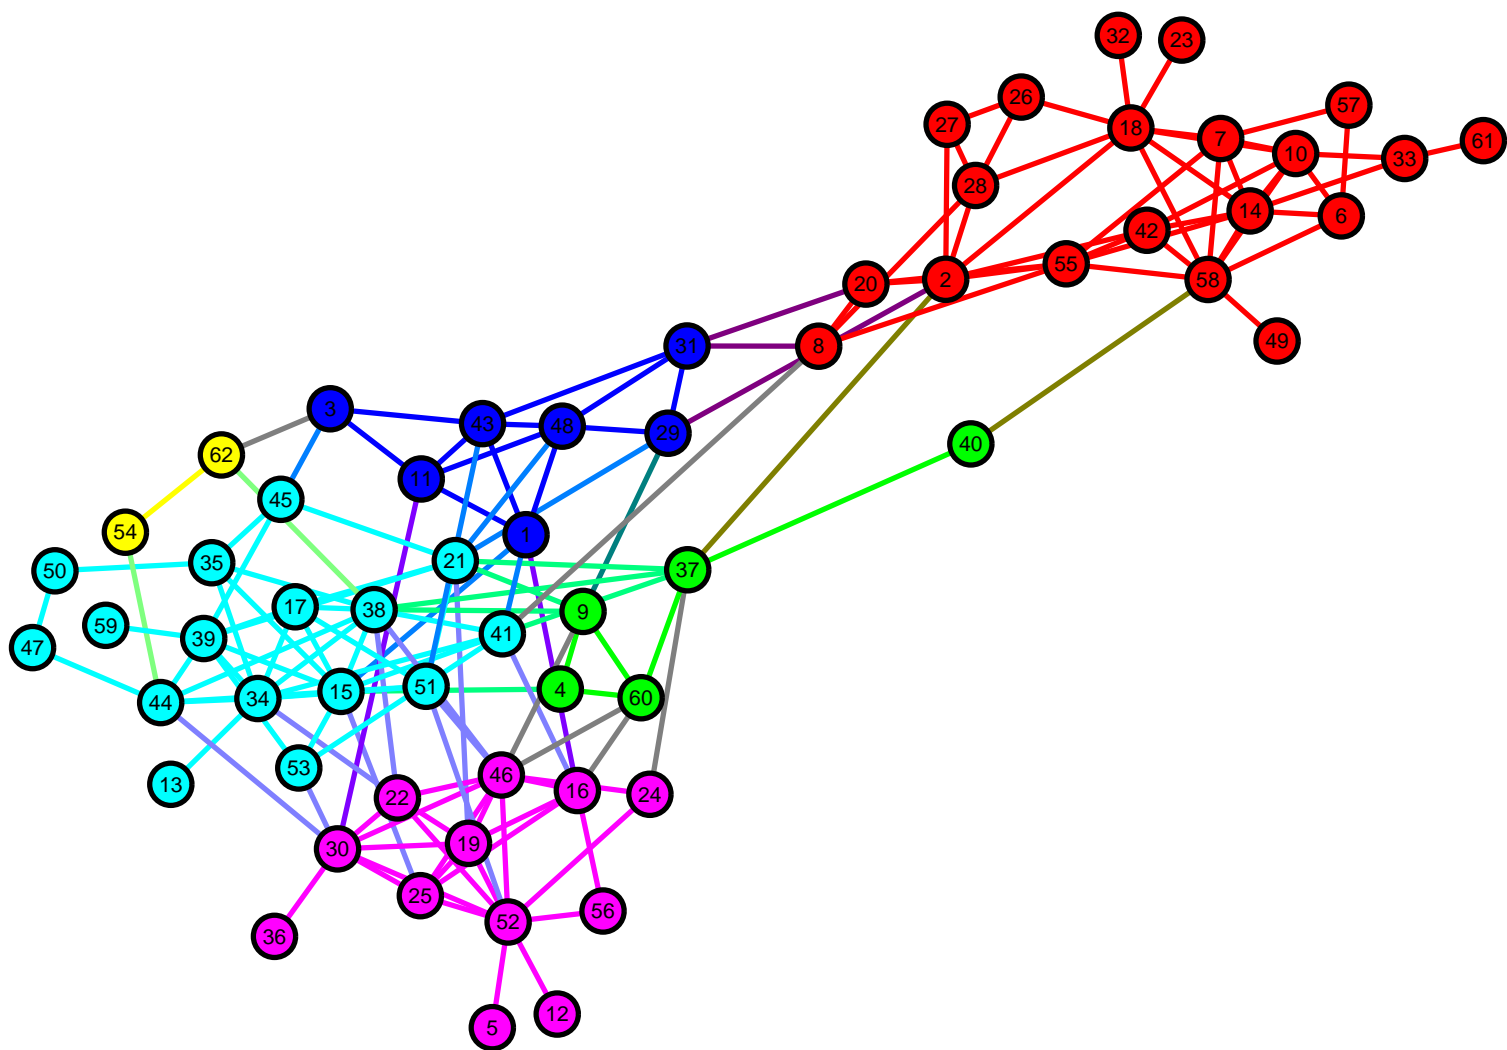

Supplement: MOESM1 [file 11901716]

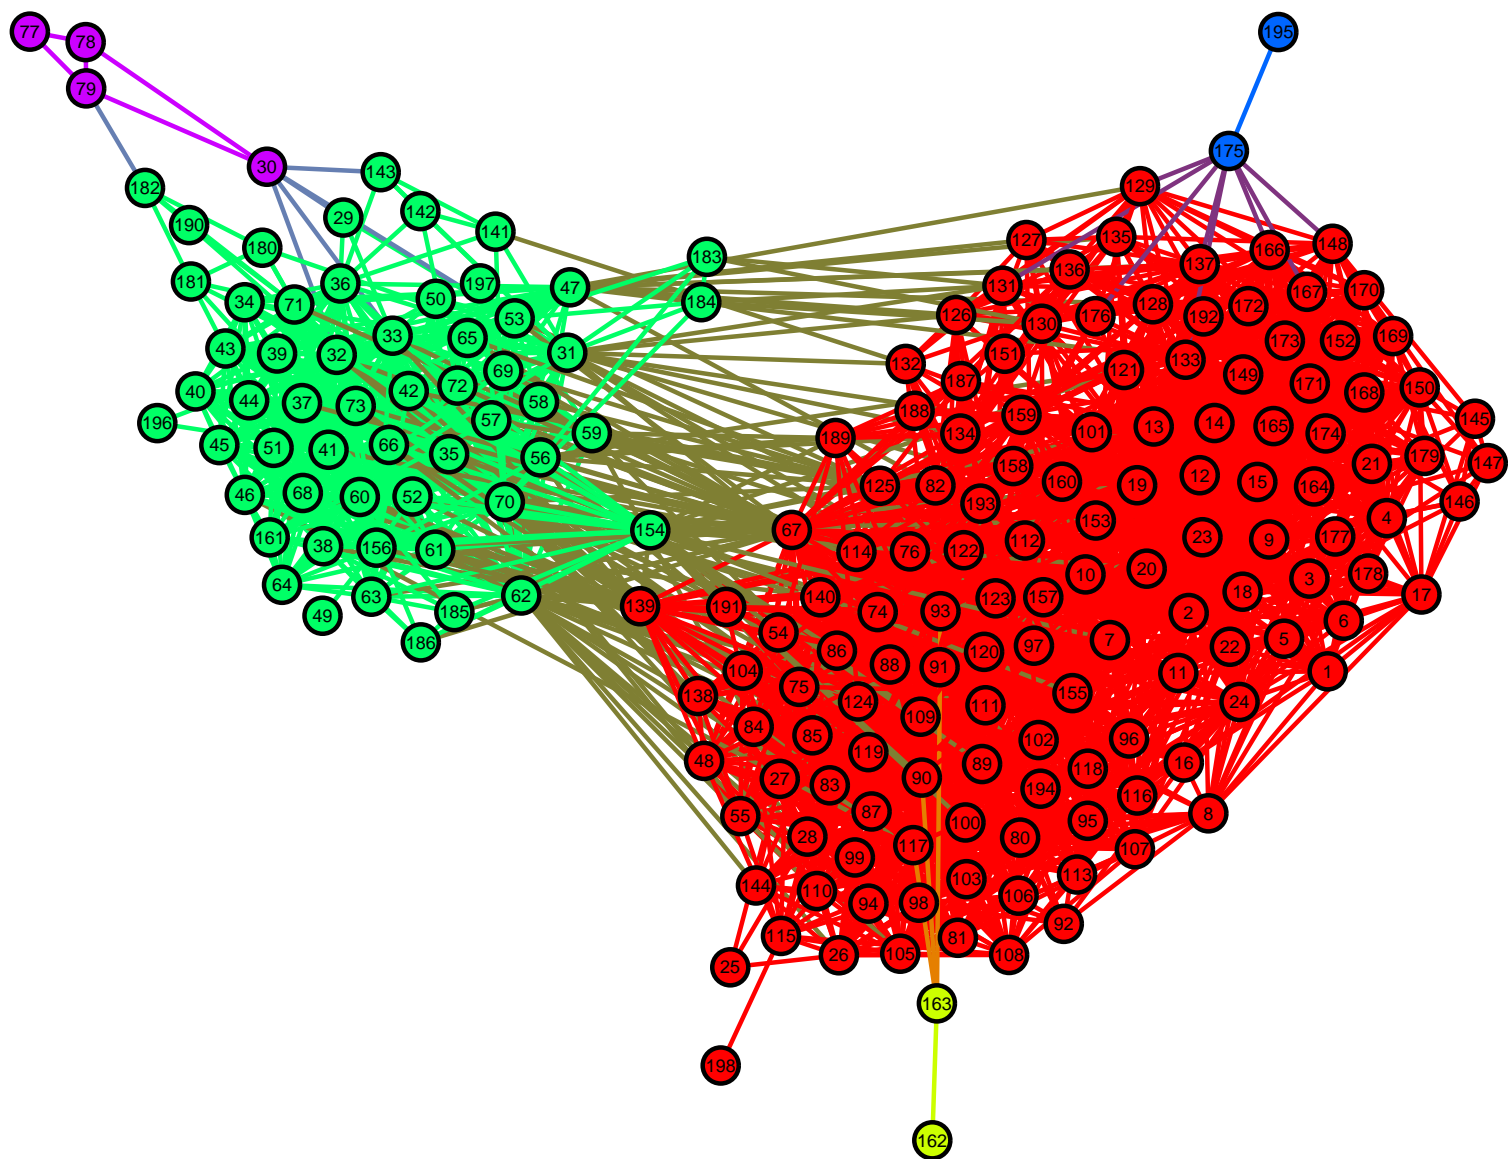

Supplement: MOESM1 [file 11901716]

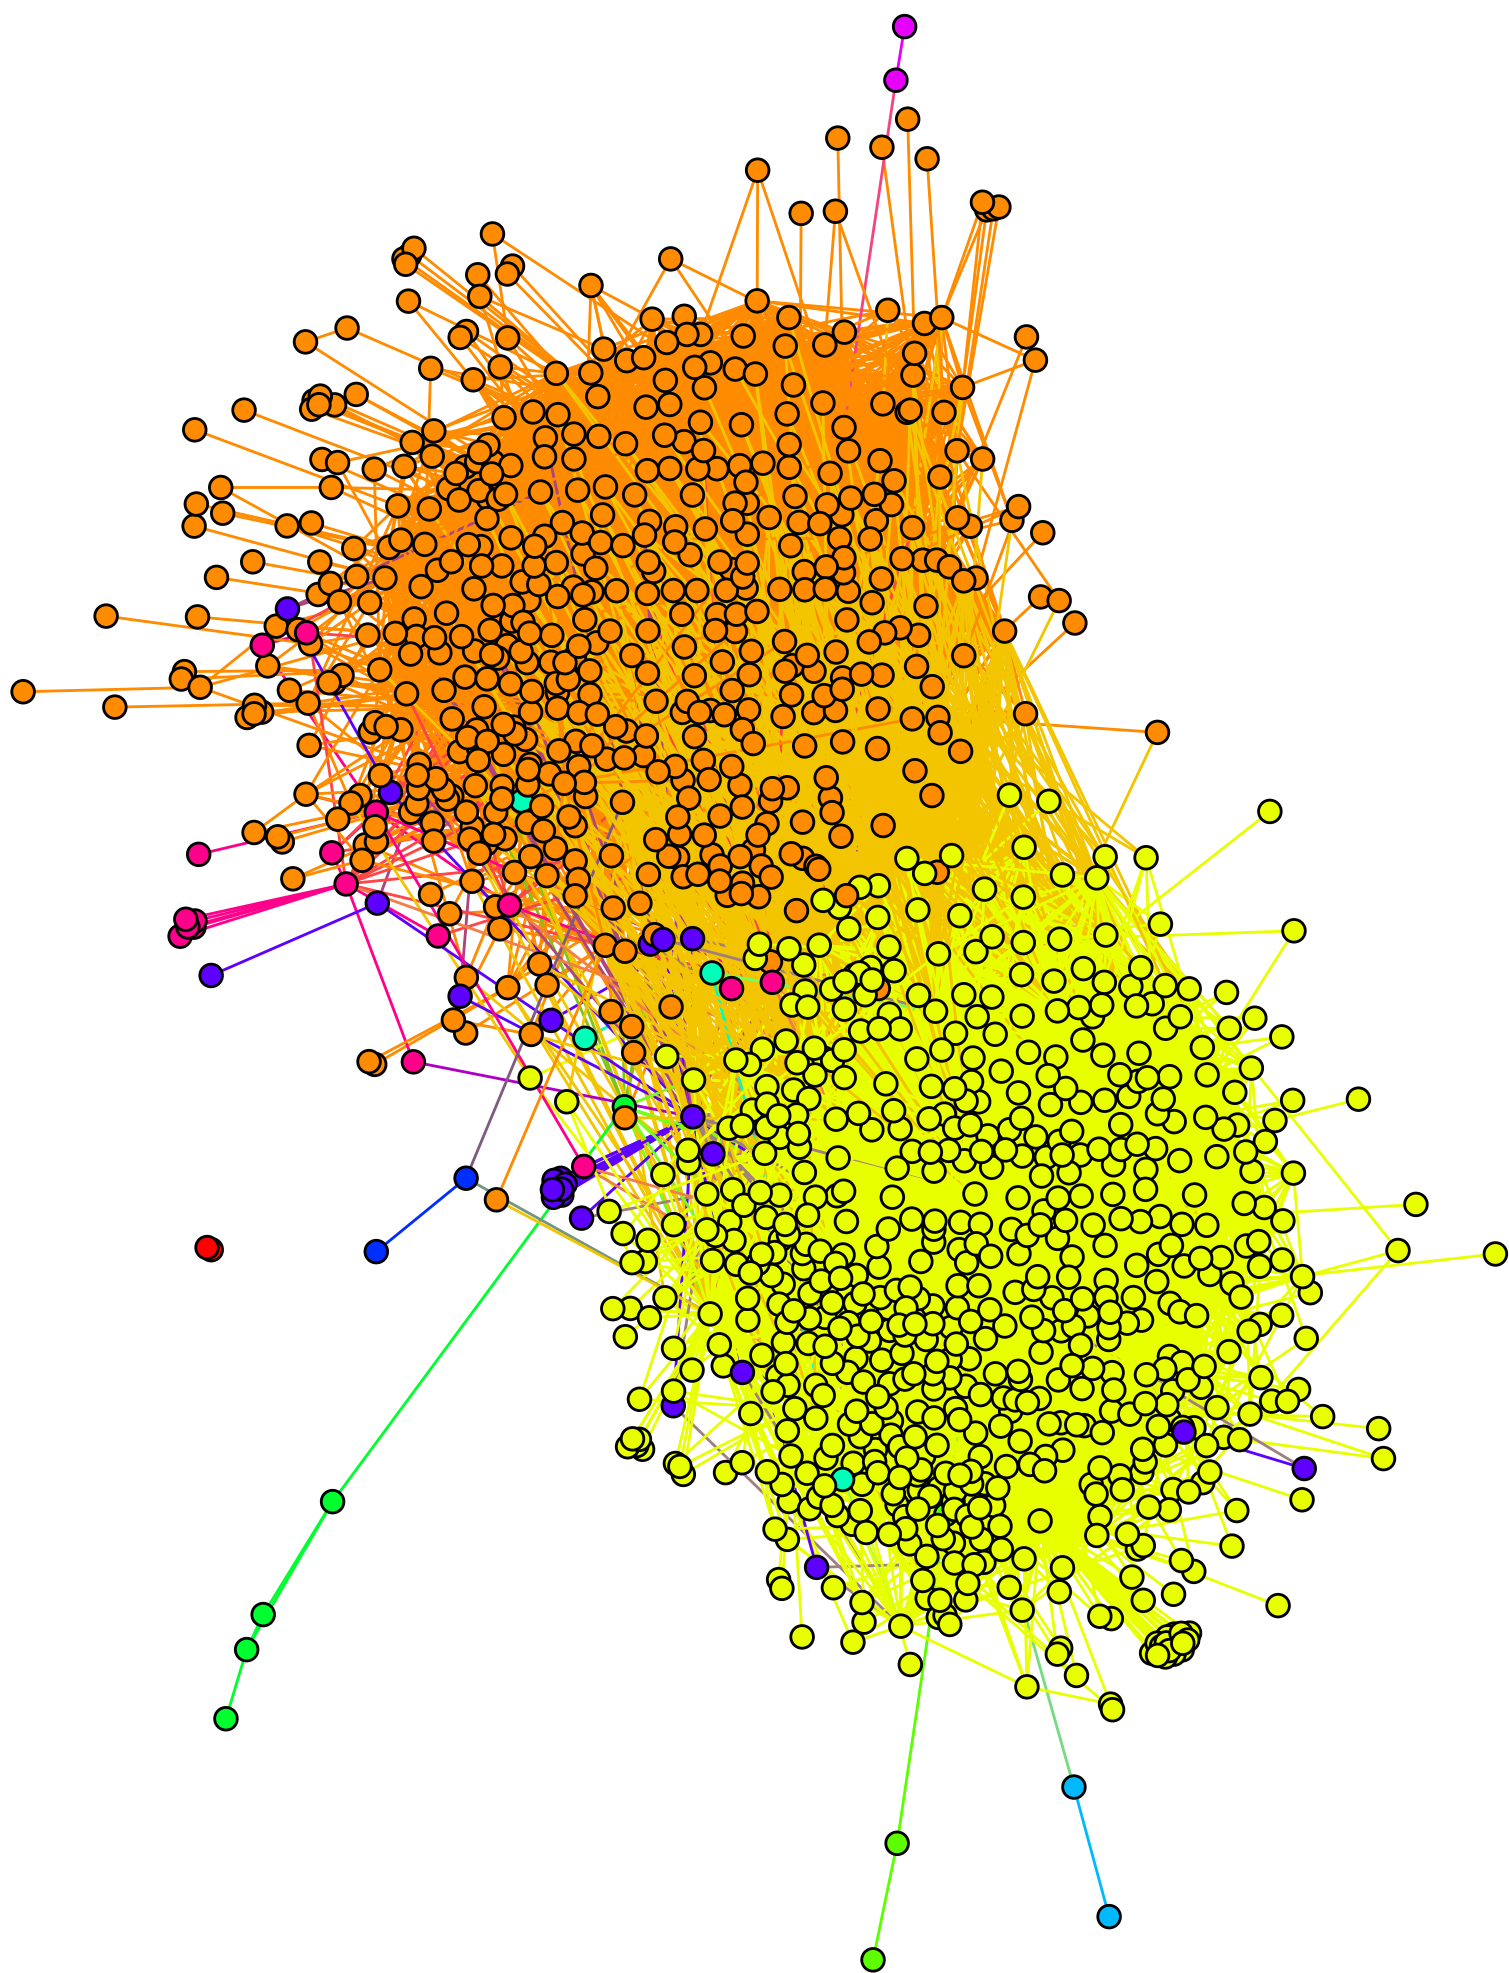

Supplement: MOESM1 [file 11901716]

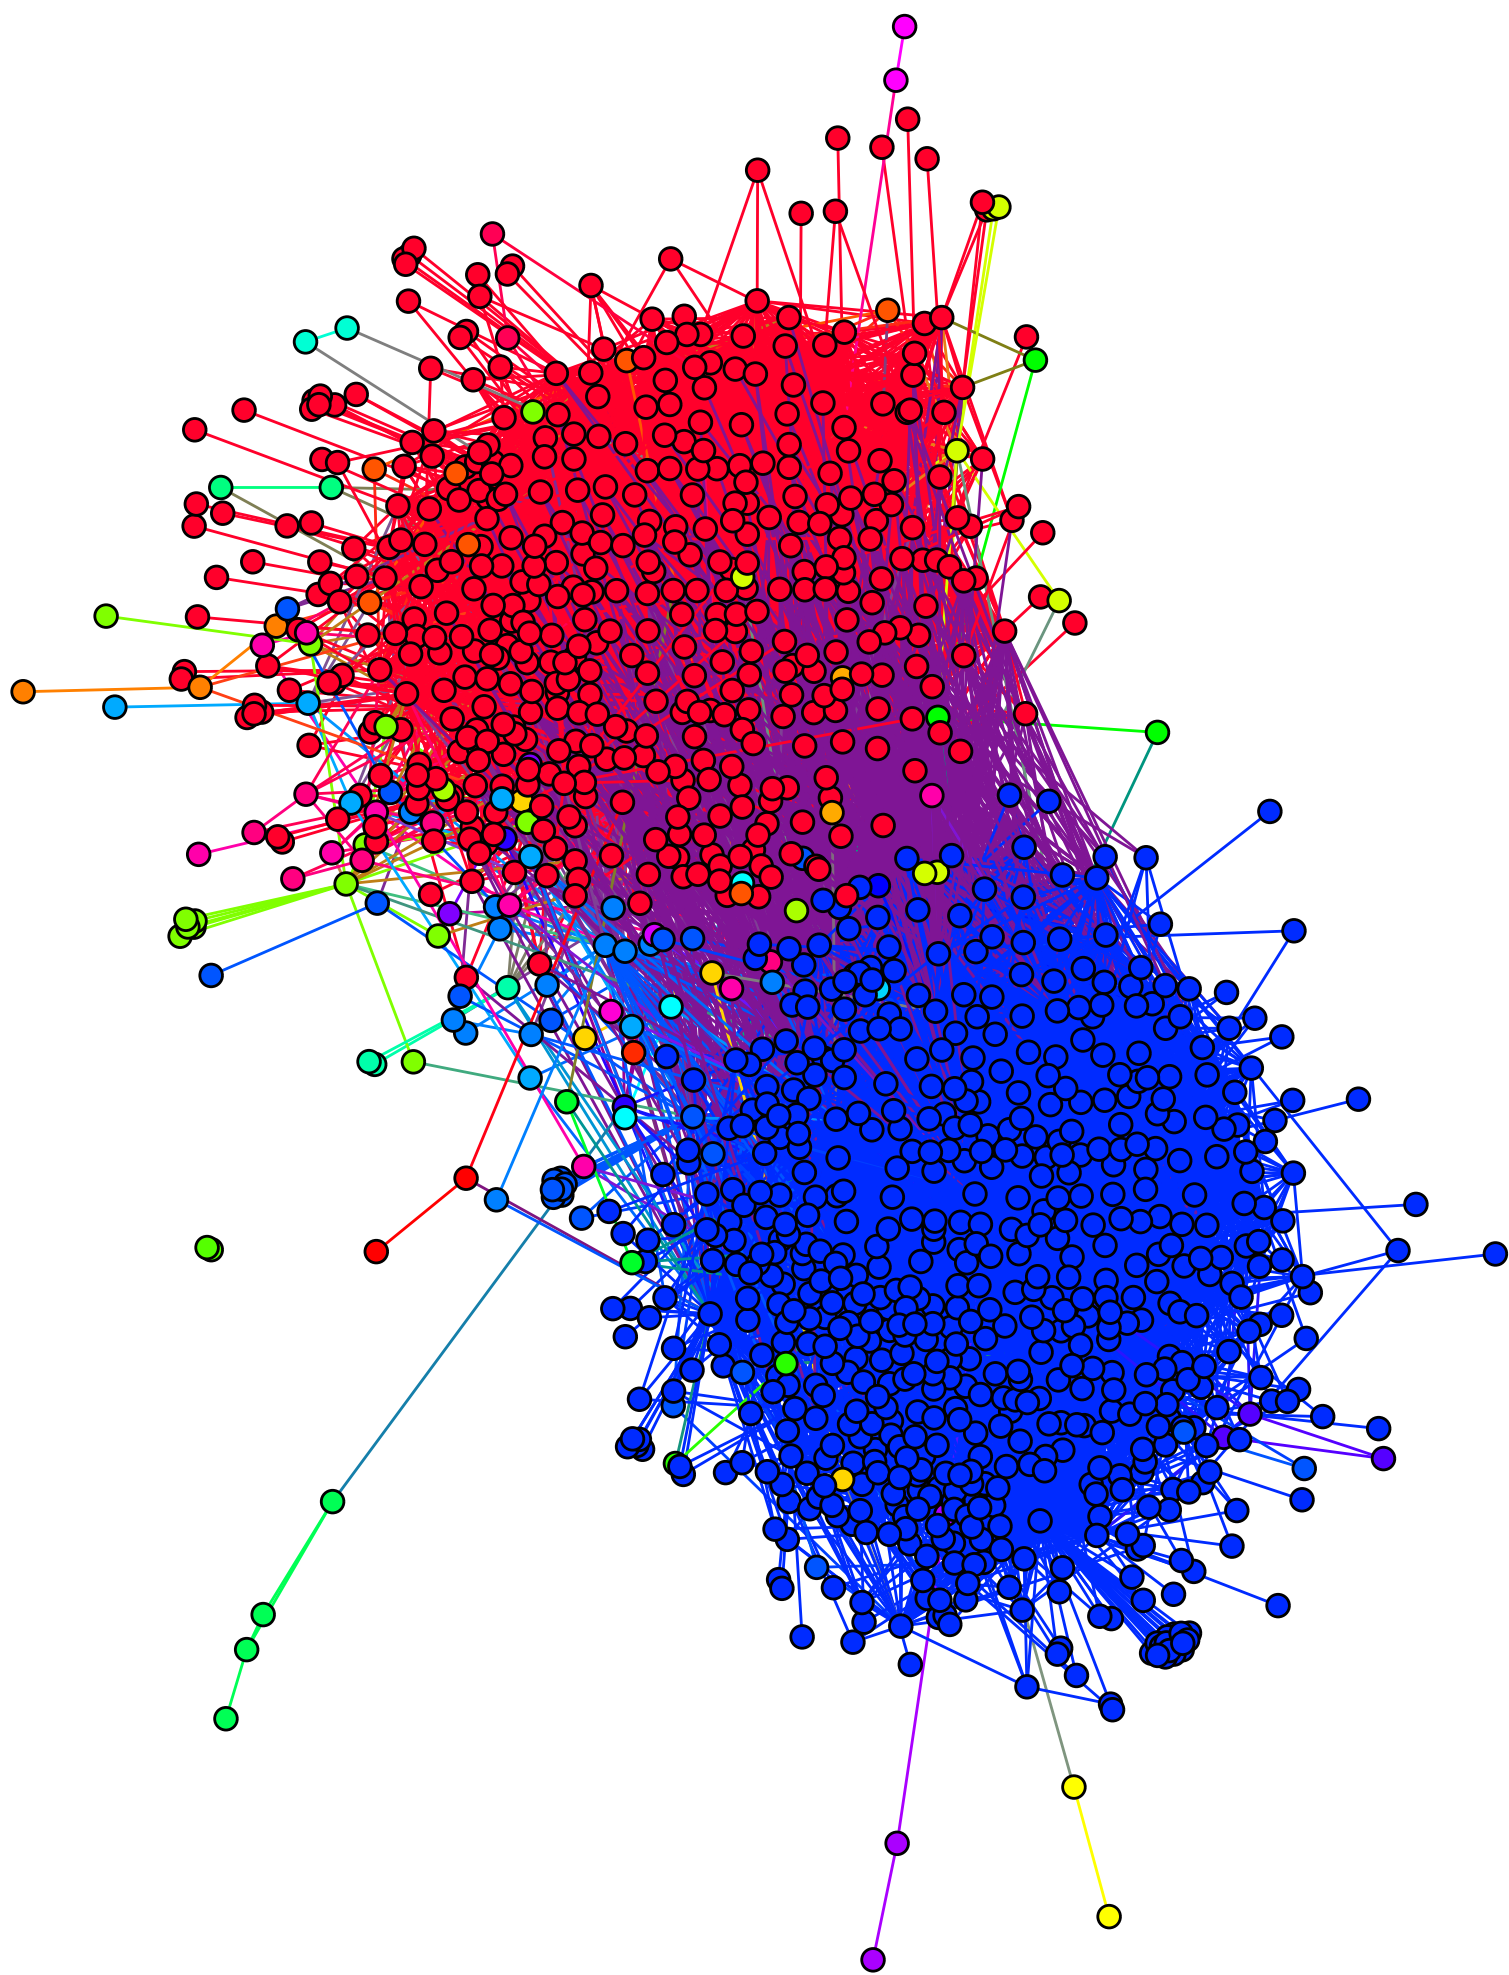

Supplement: MOESM1 [file 11901716]

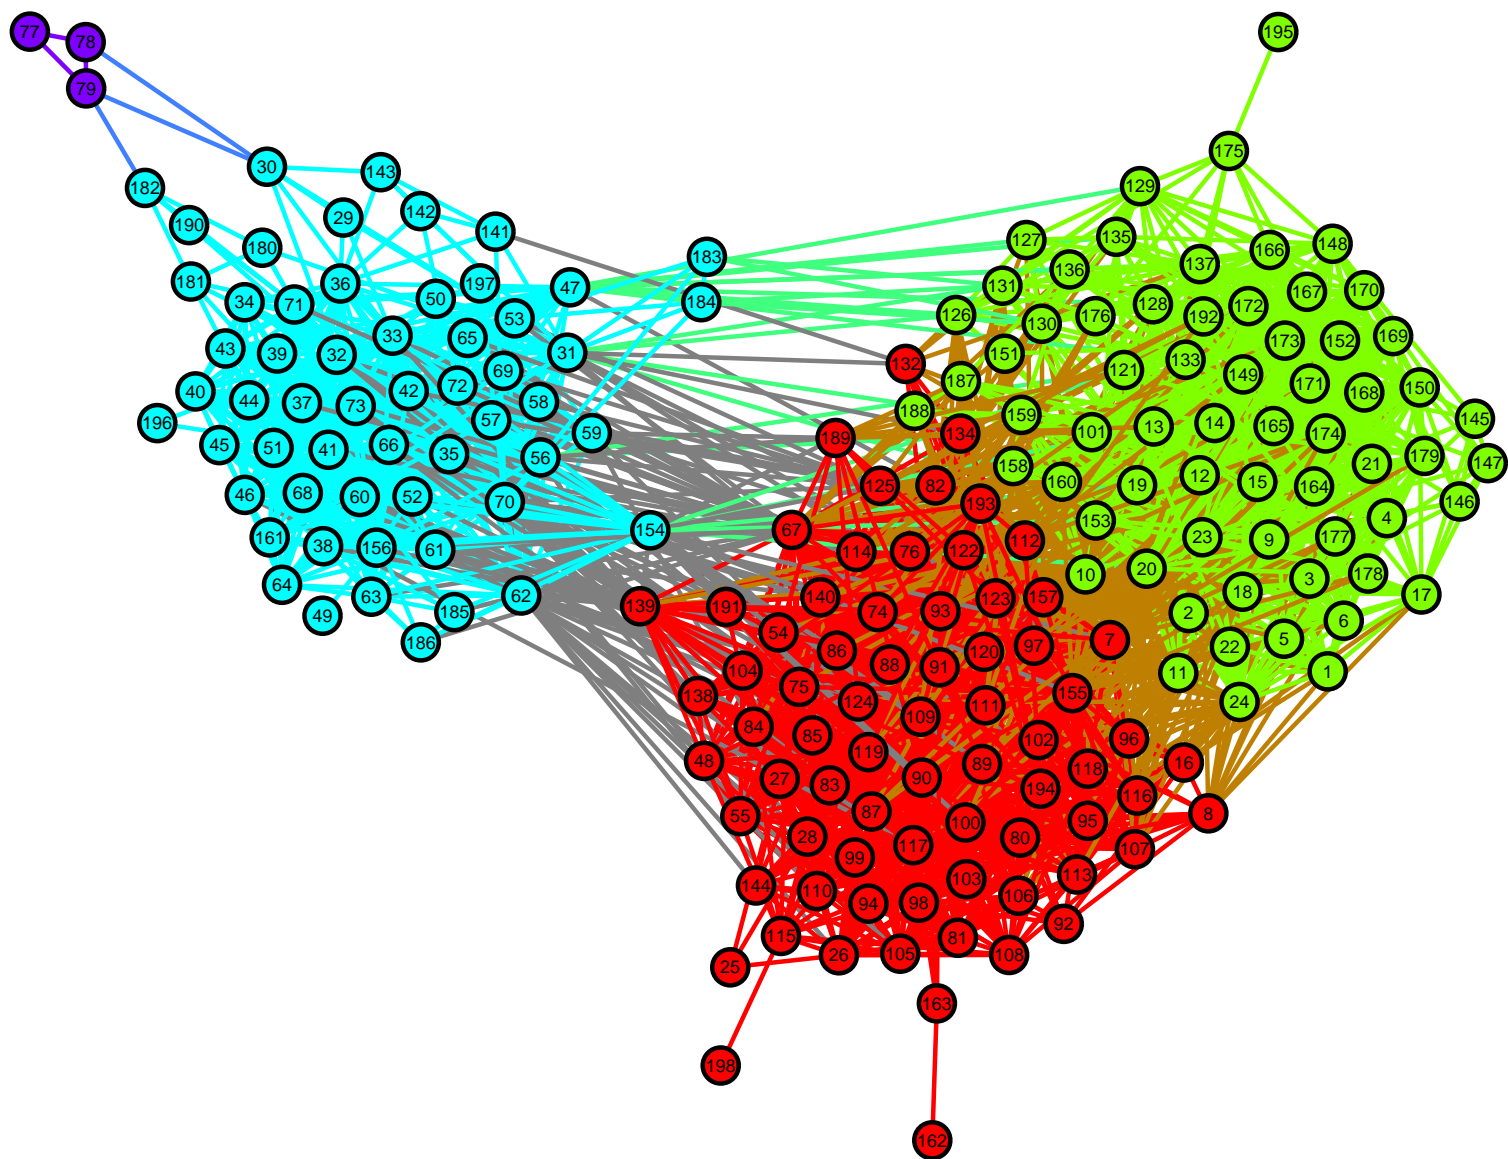

Supplement: MOESM1 [file 11901716]

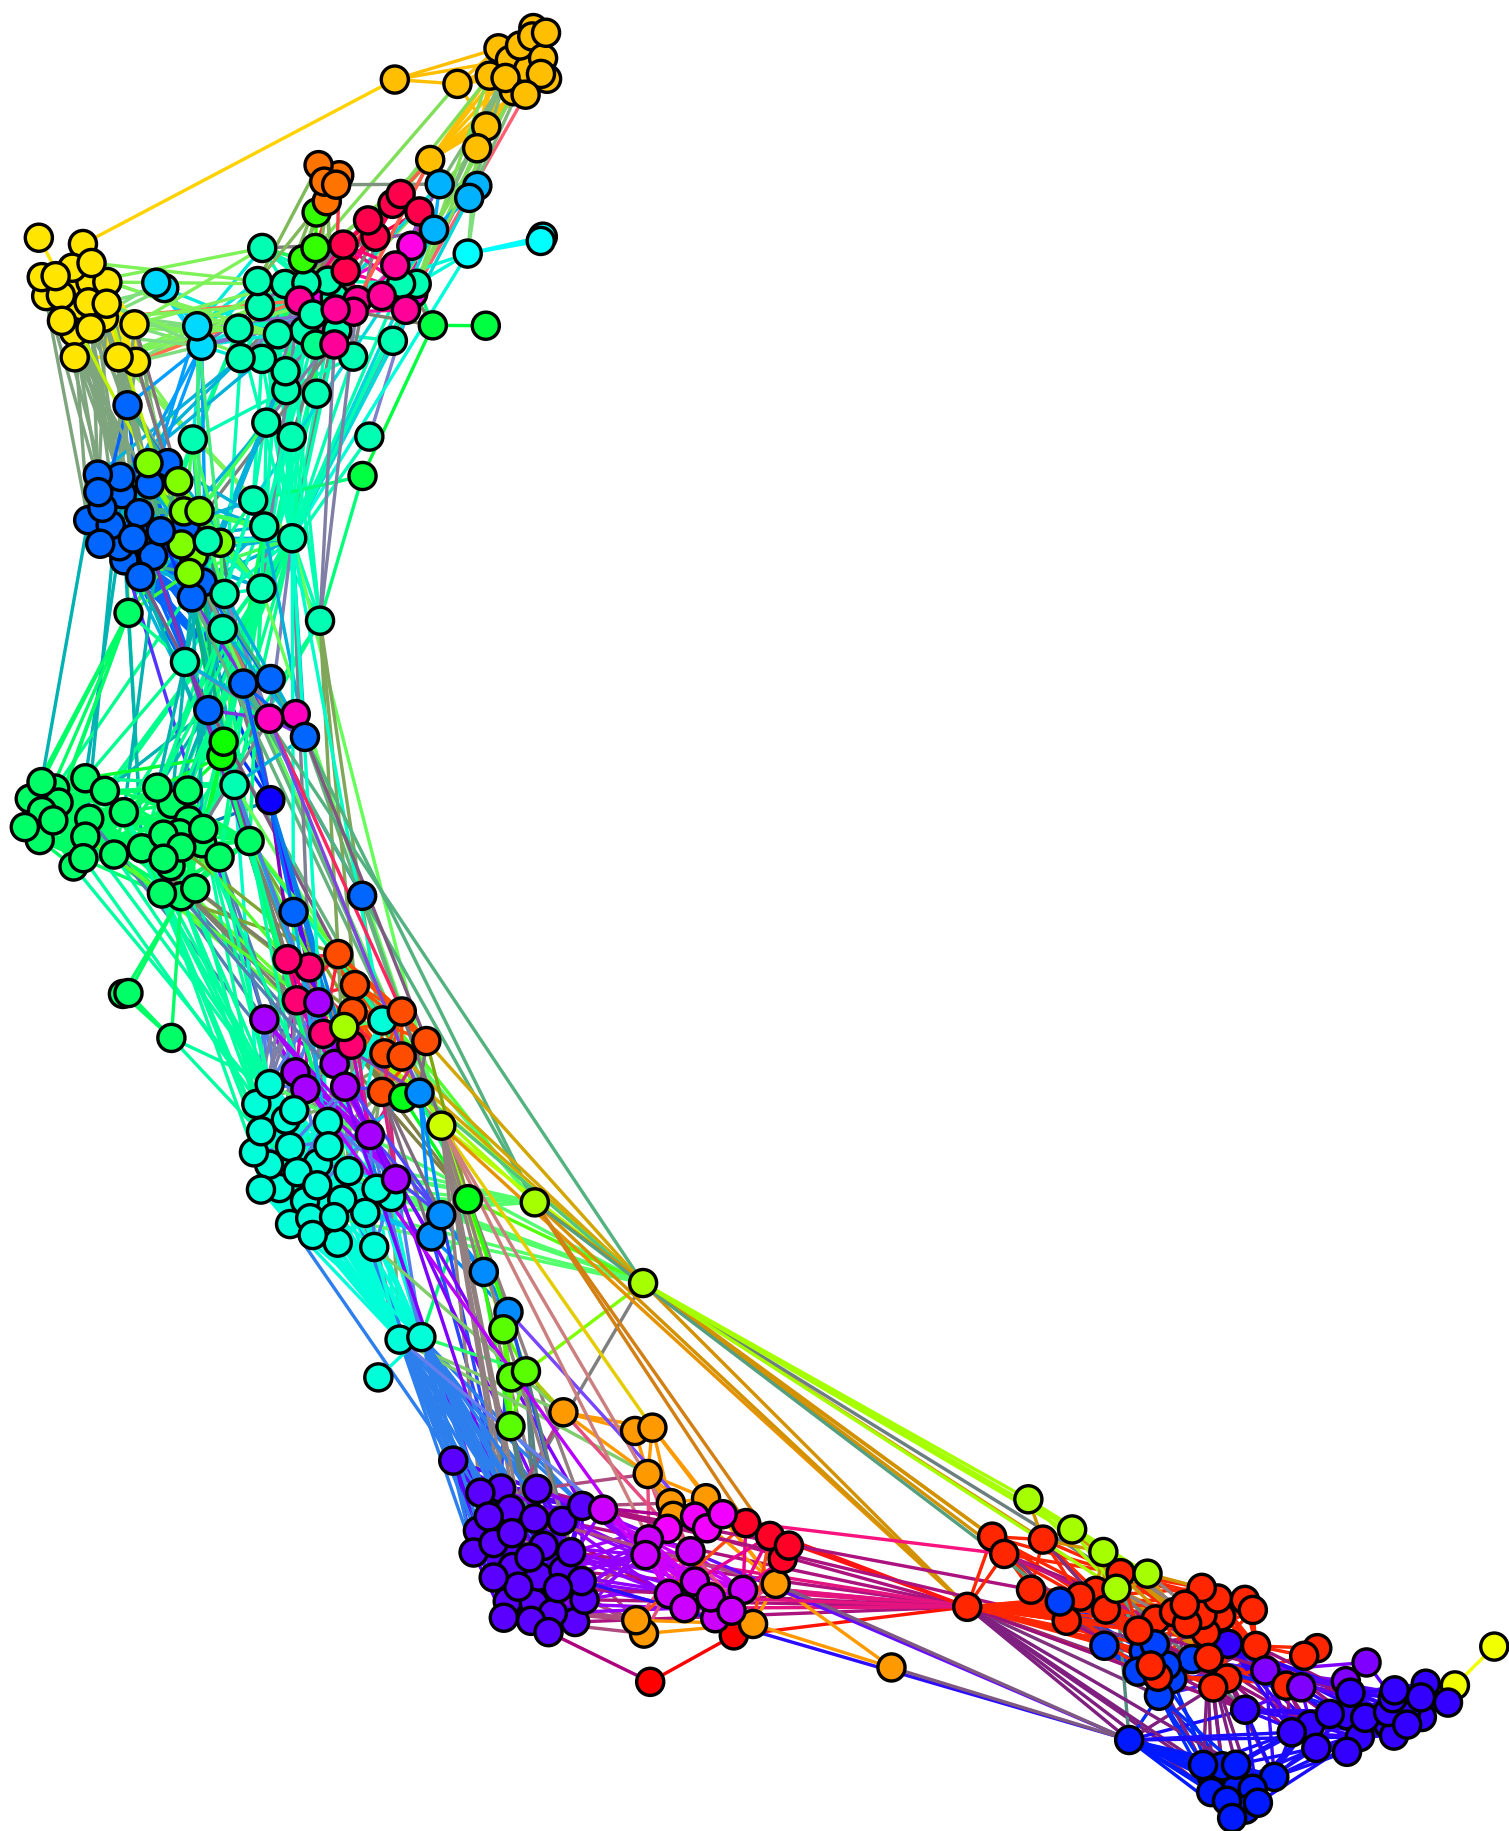

Supplement: MOESM1 [file 11901716]

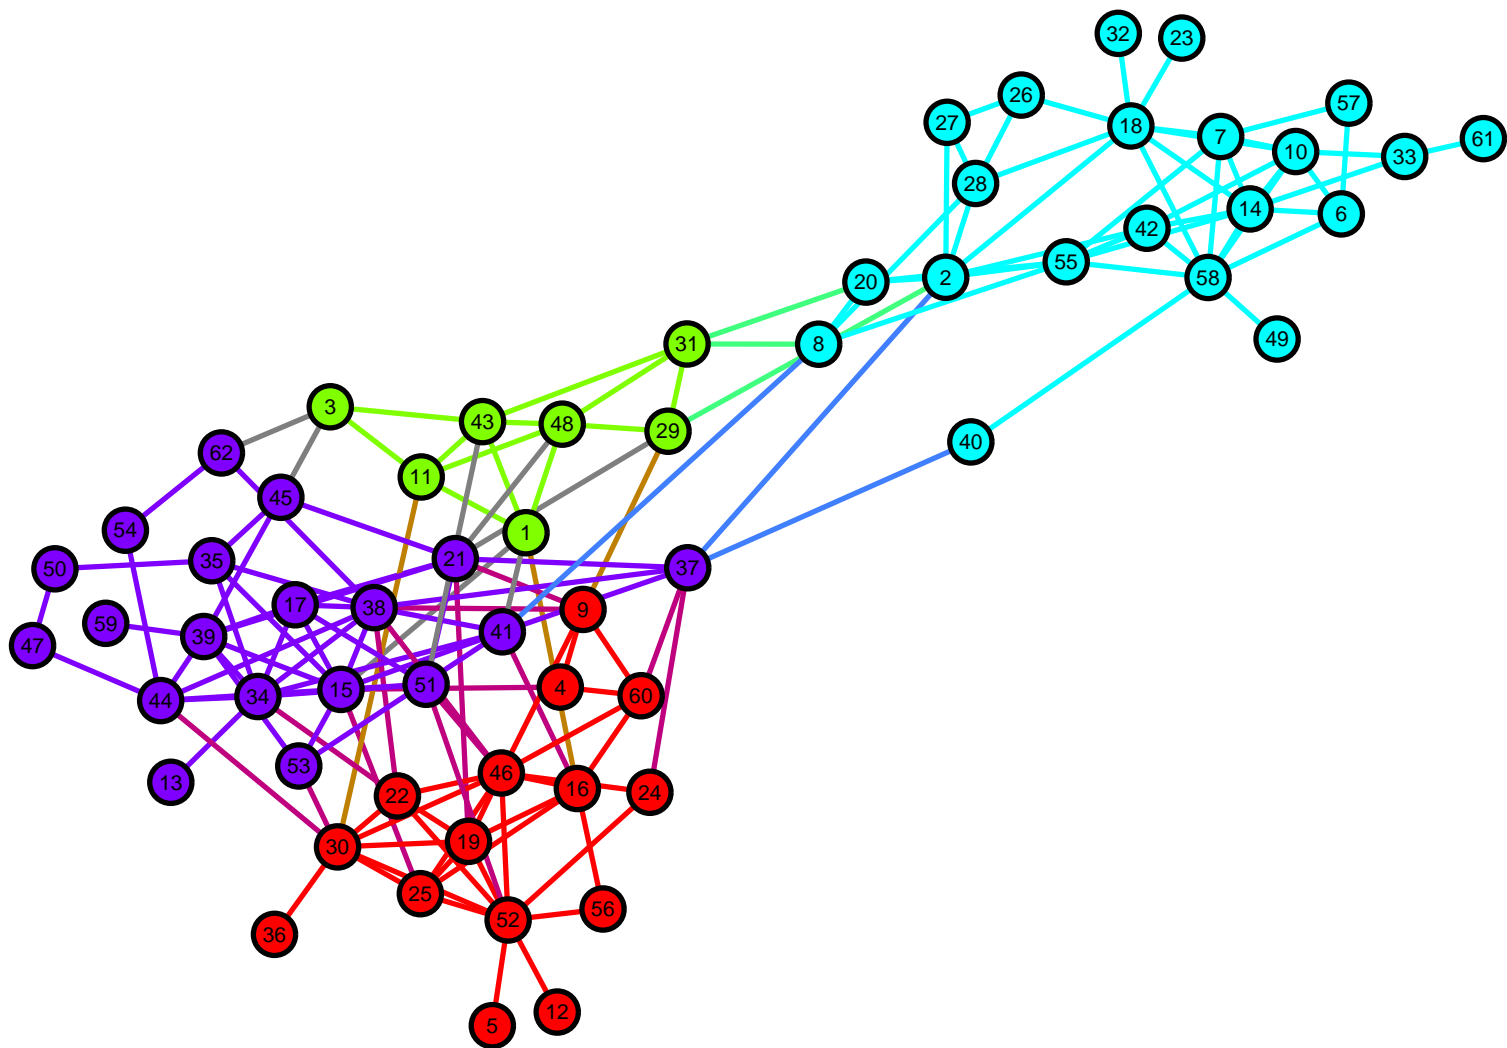

Supplement: MOESM1 [file 11901716]

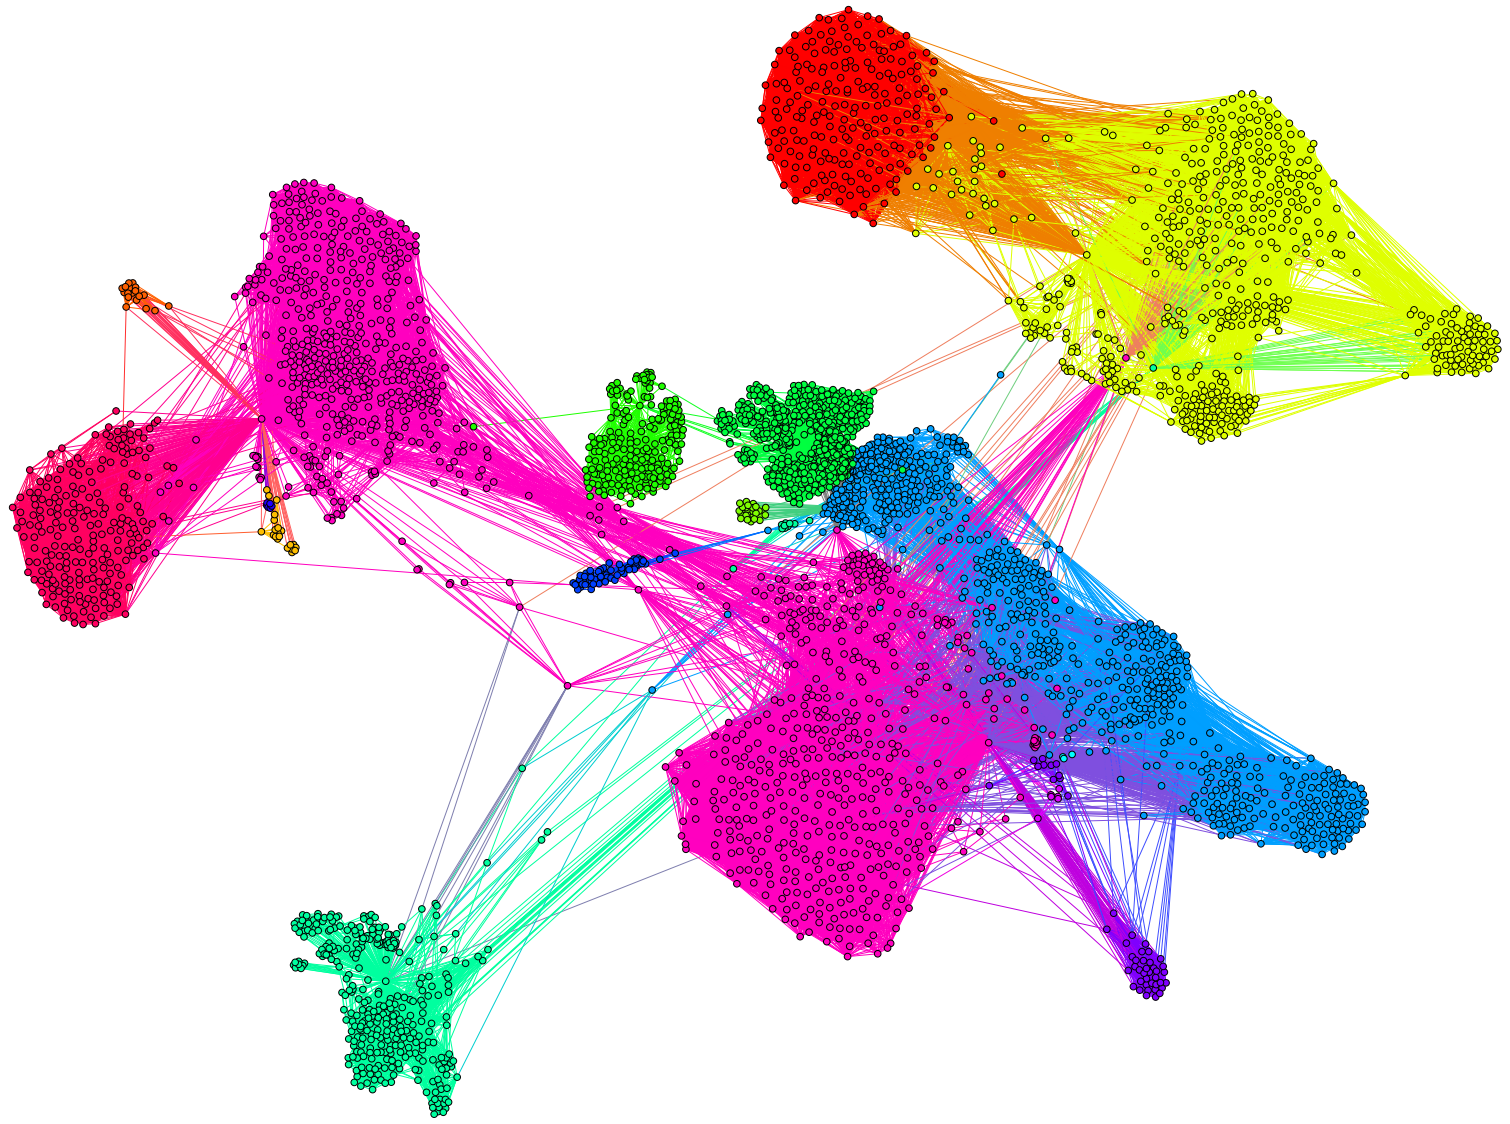

Supplement: MOESM1 [file 11901716]

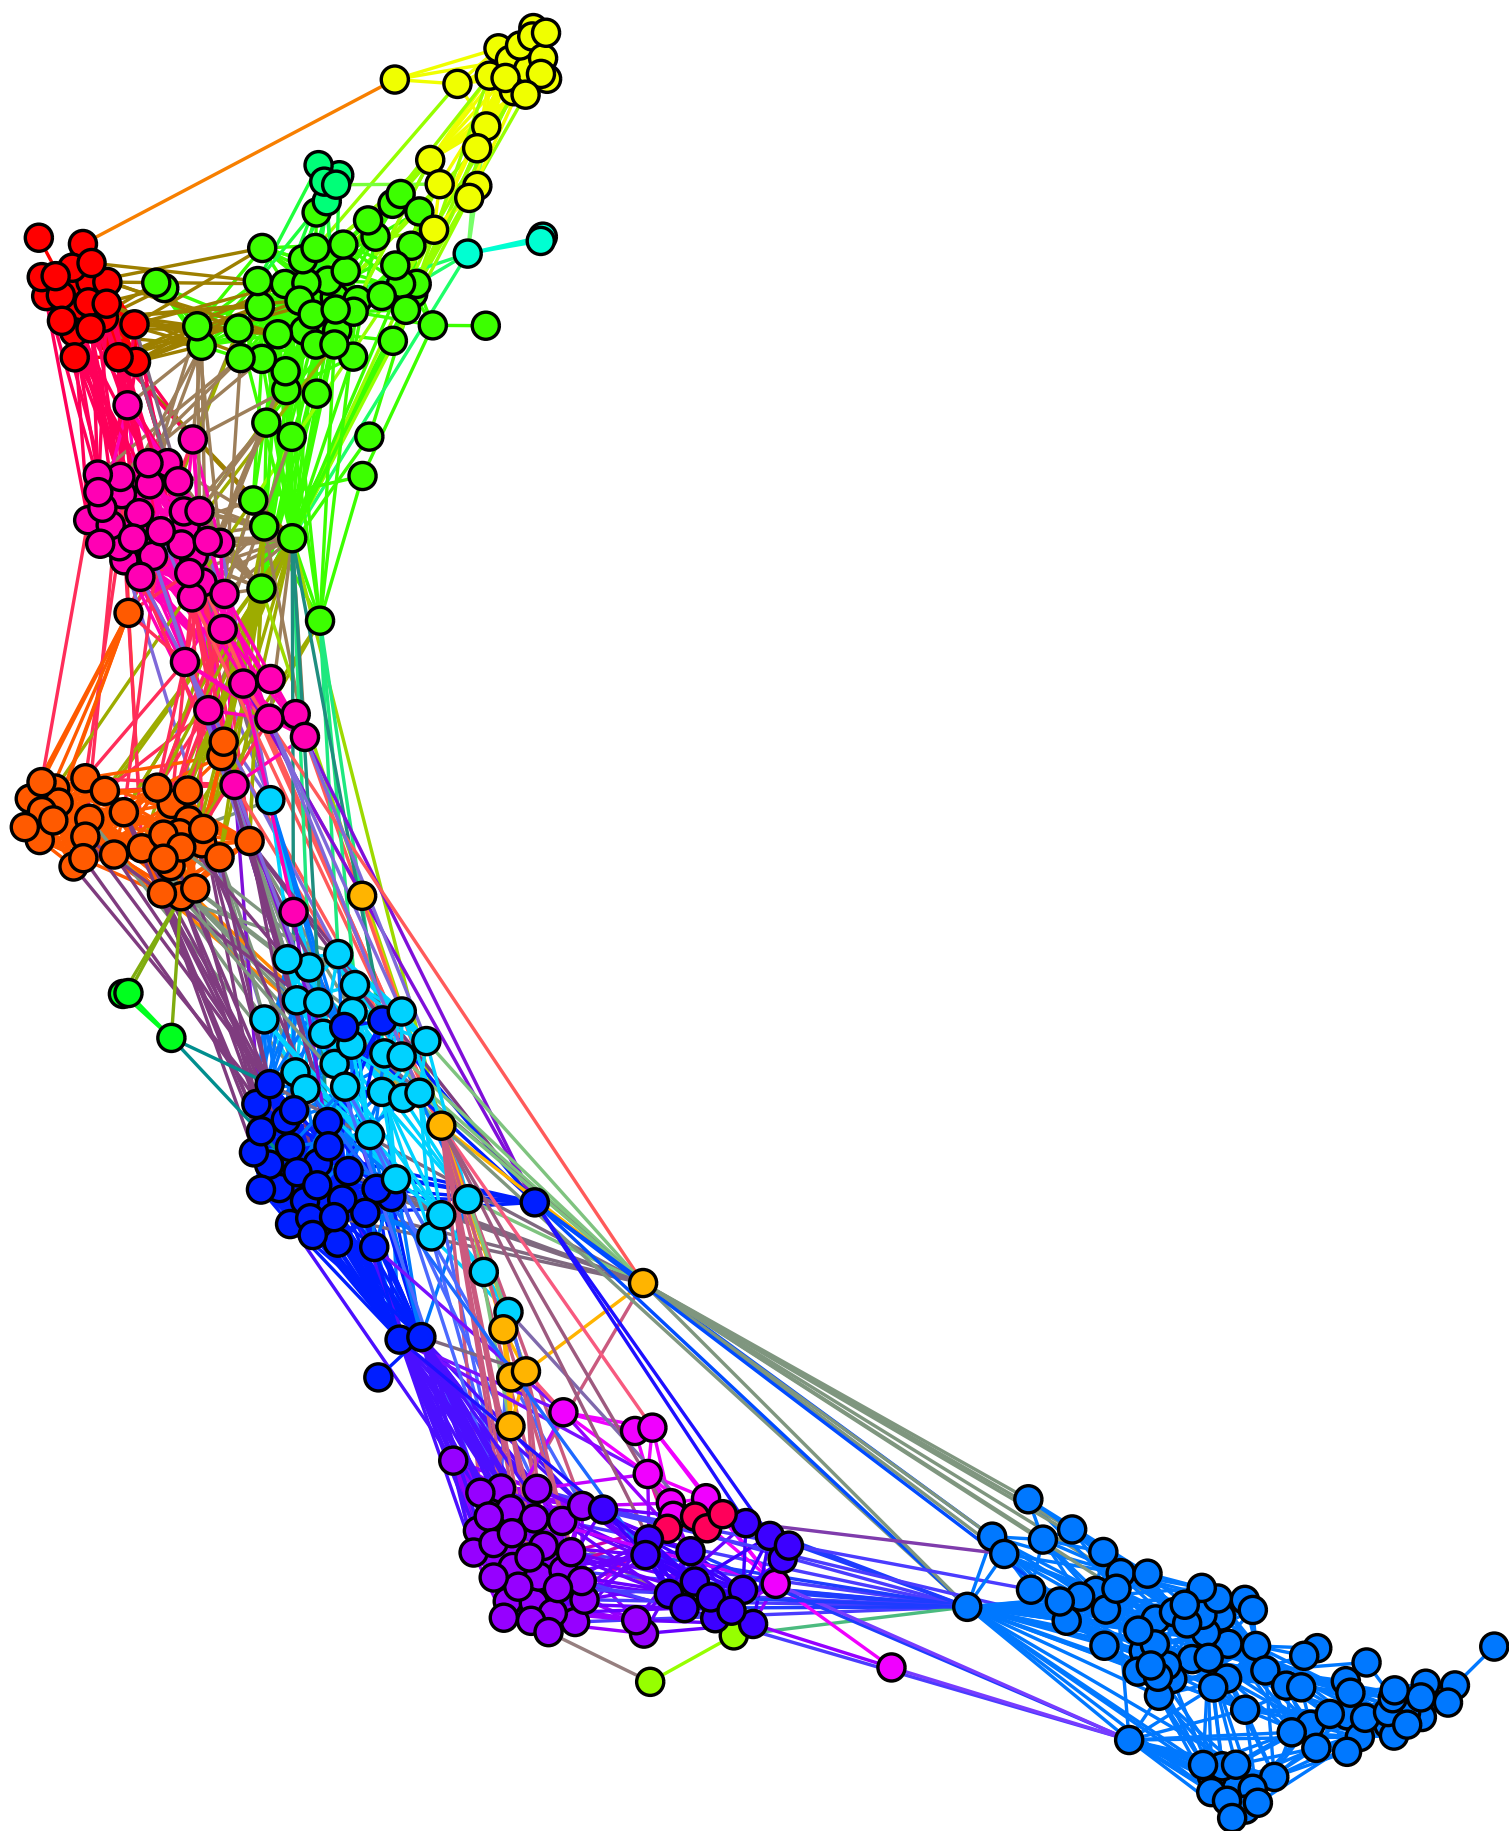

Supplement: MOESM1 [file 11901716]

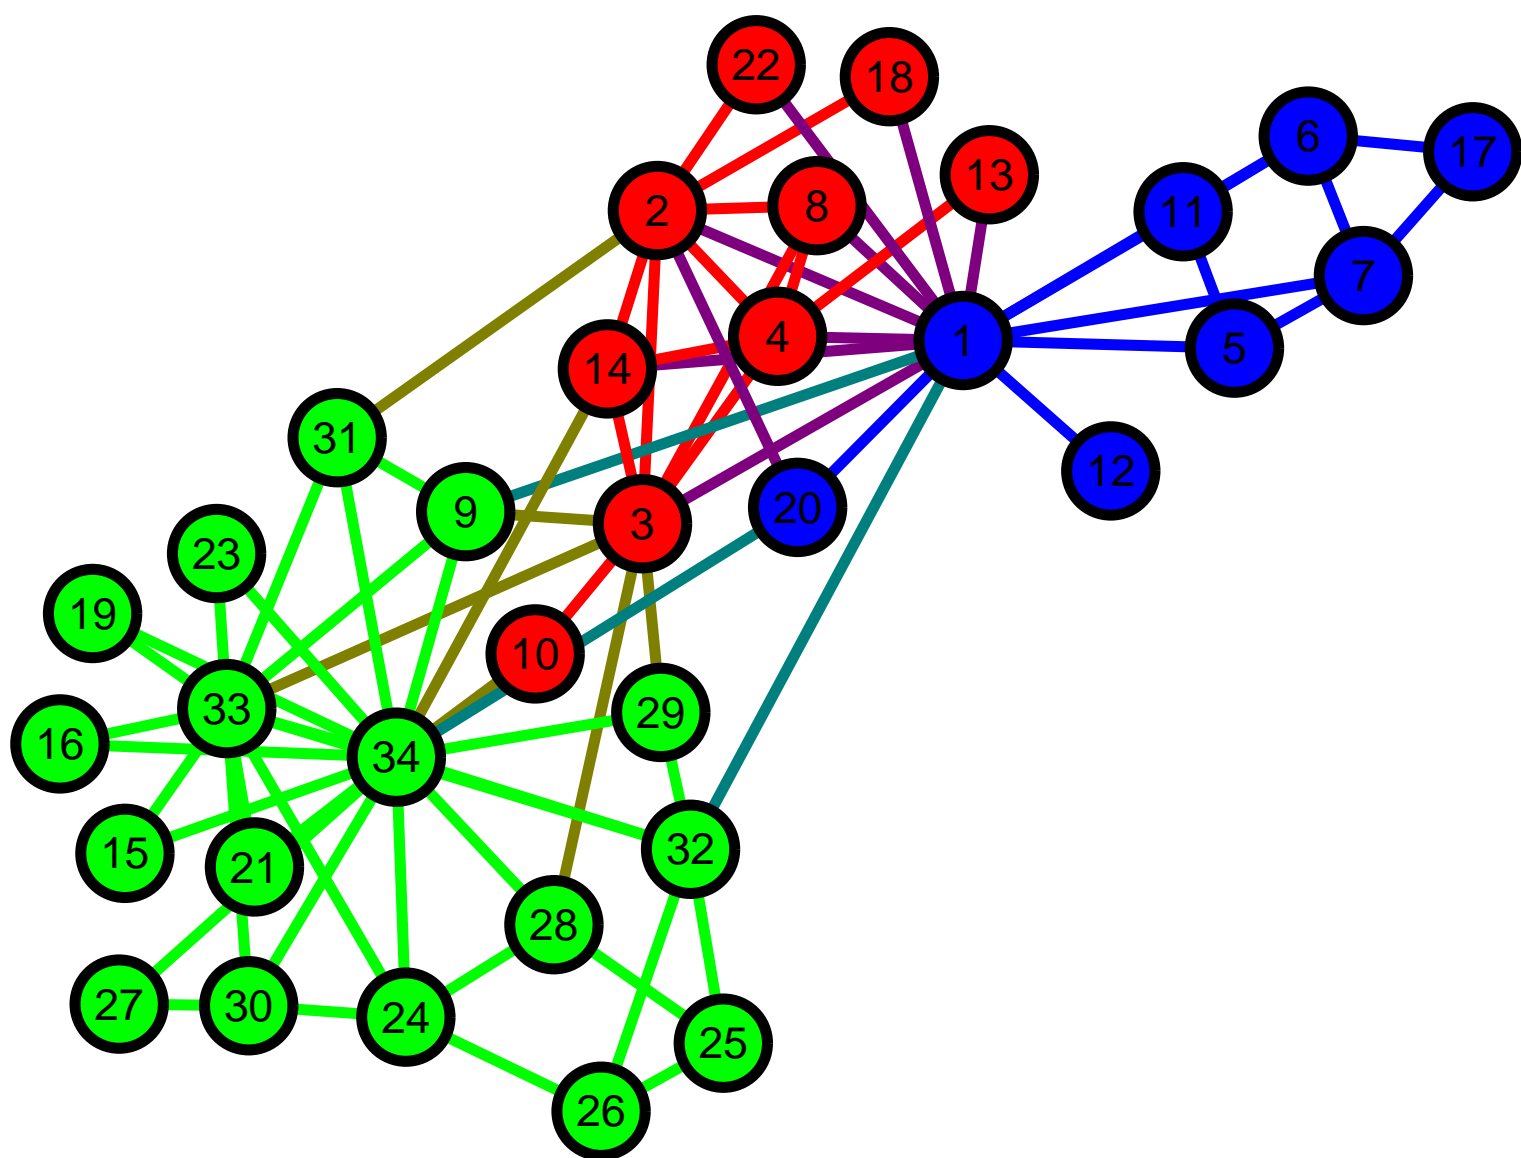

Supplement: MOESM1 [file 11901716]

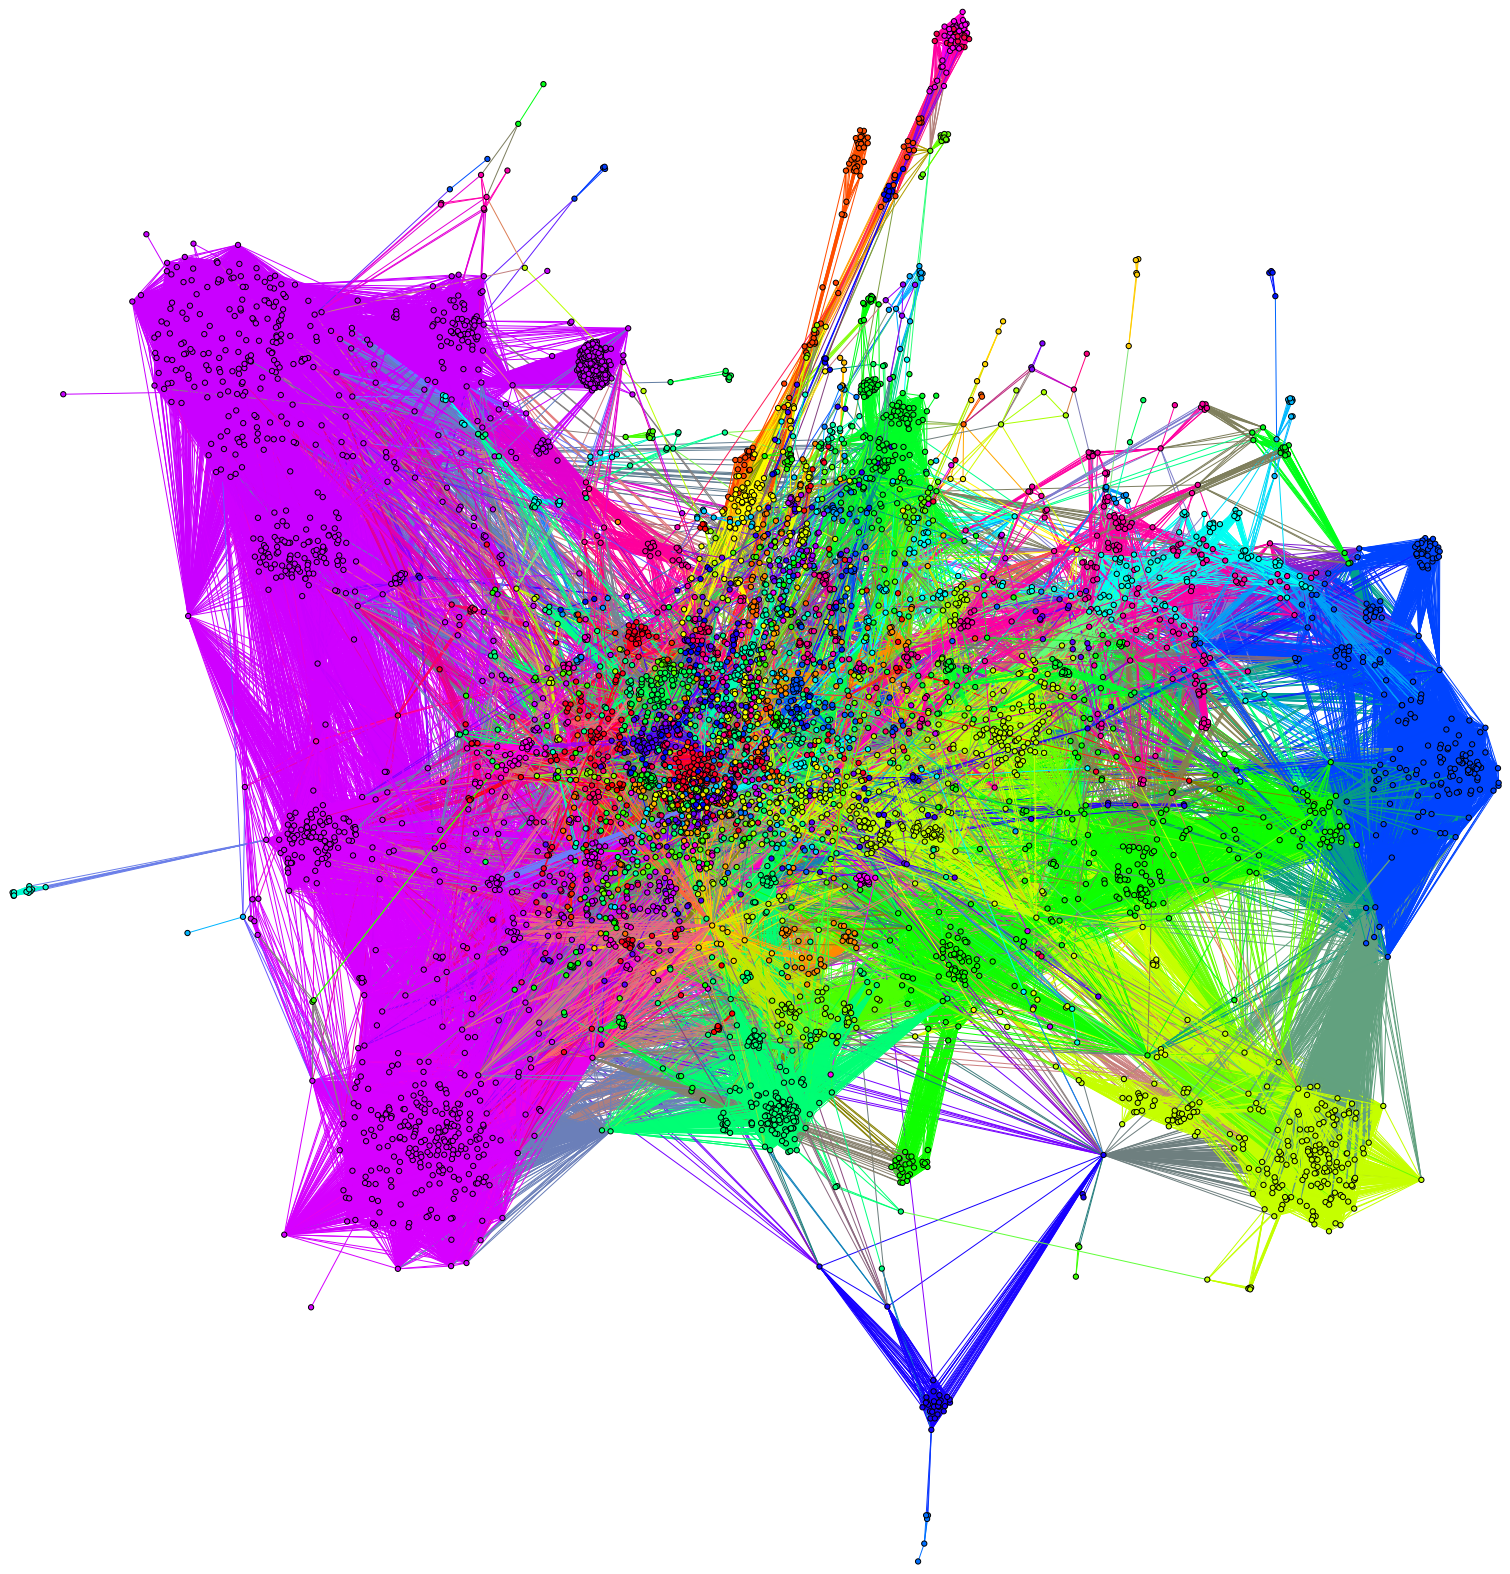

Supplement: MOESM1 [file 11901716]

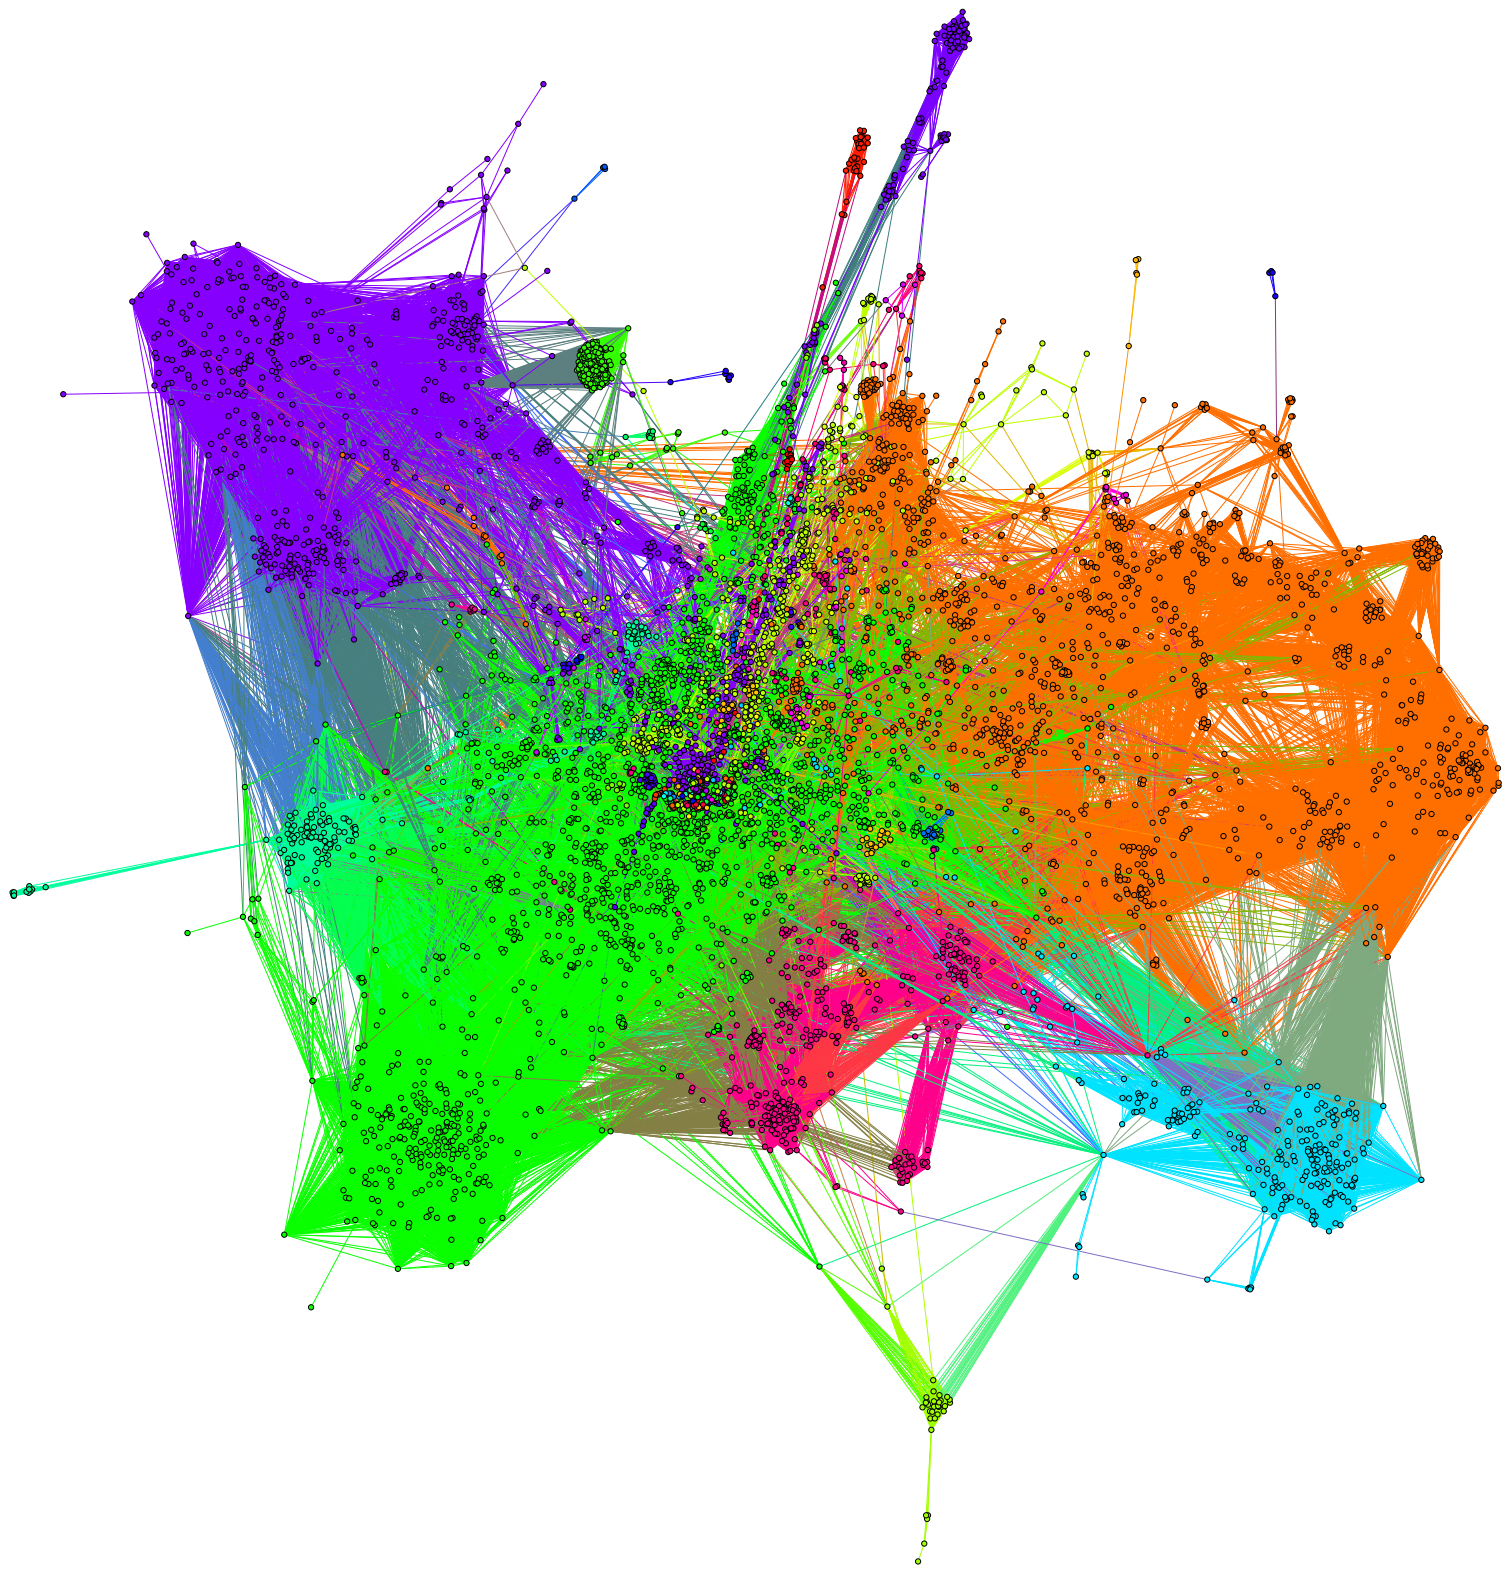

Supplement: MOESM1 [file 11901716]

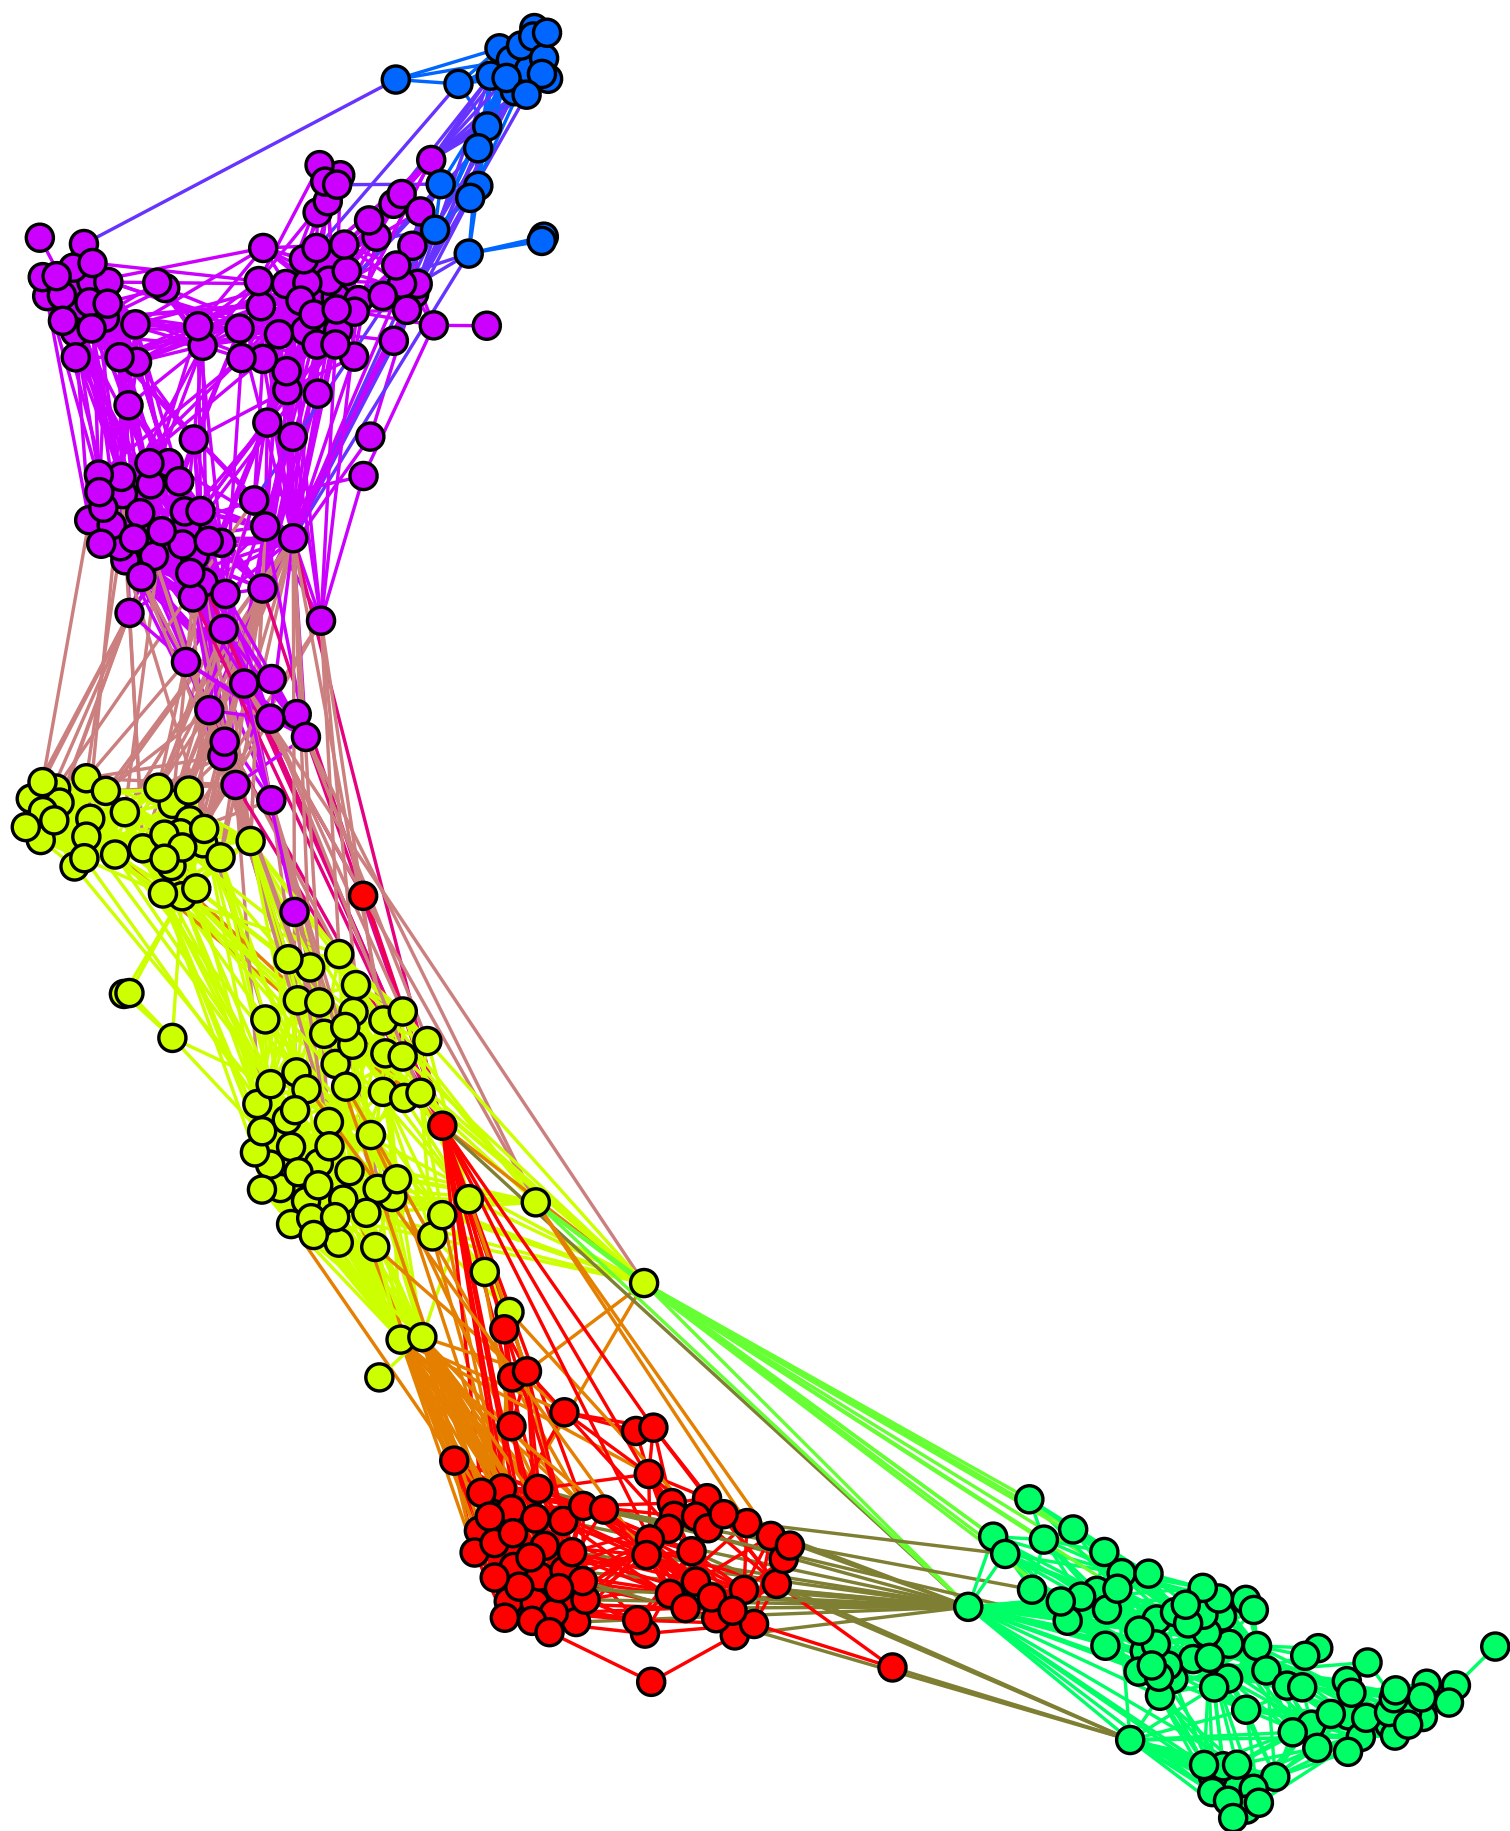

Supplement: MOESM1 [file 11901716]

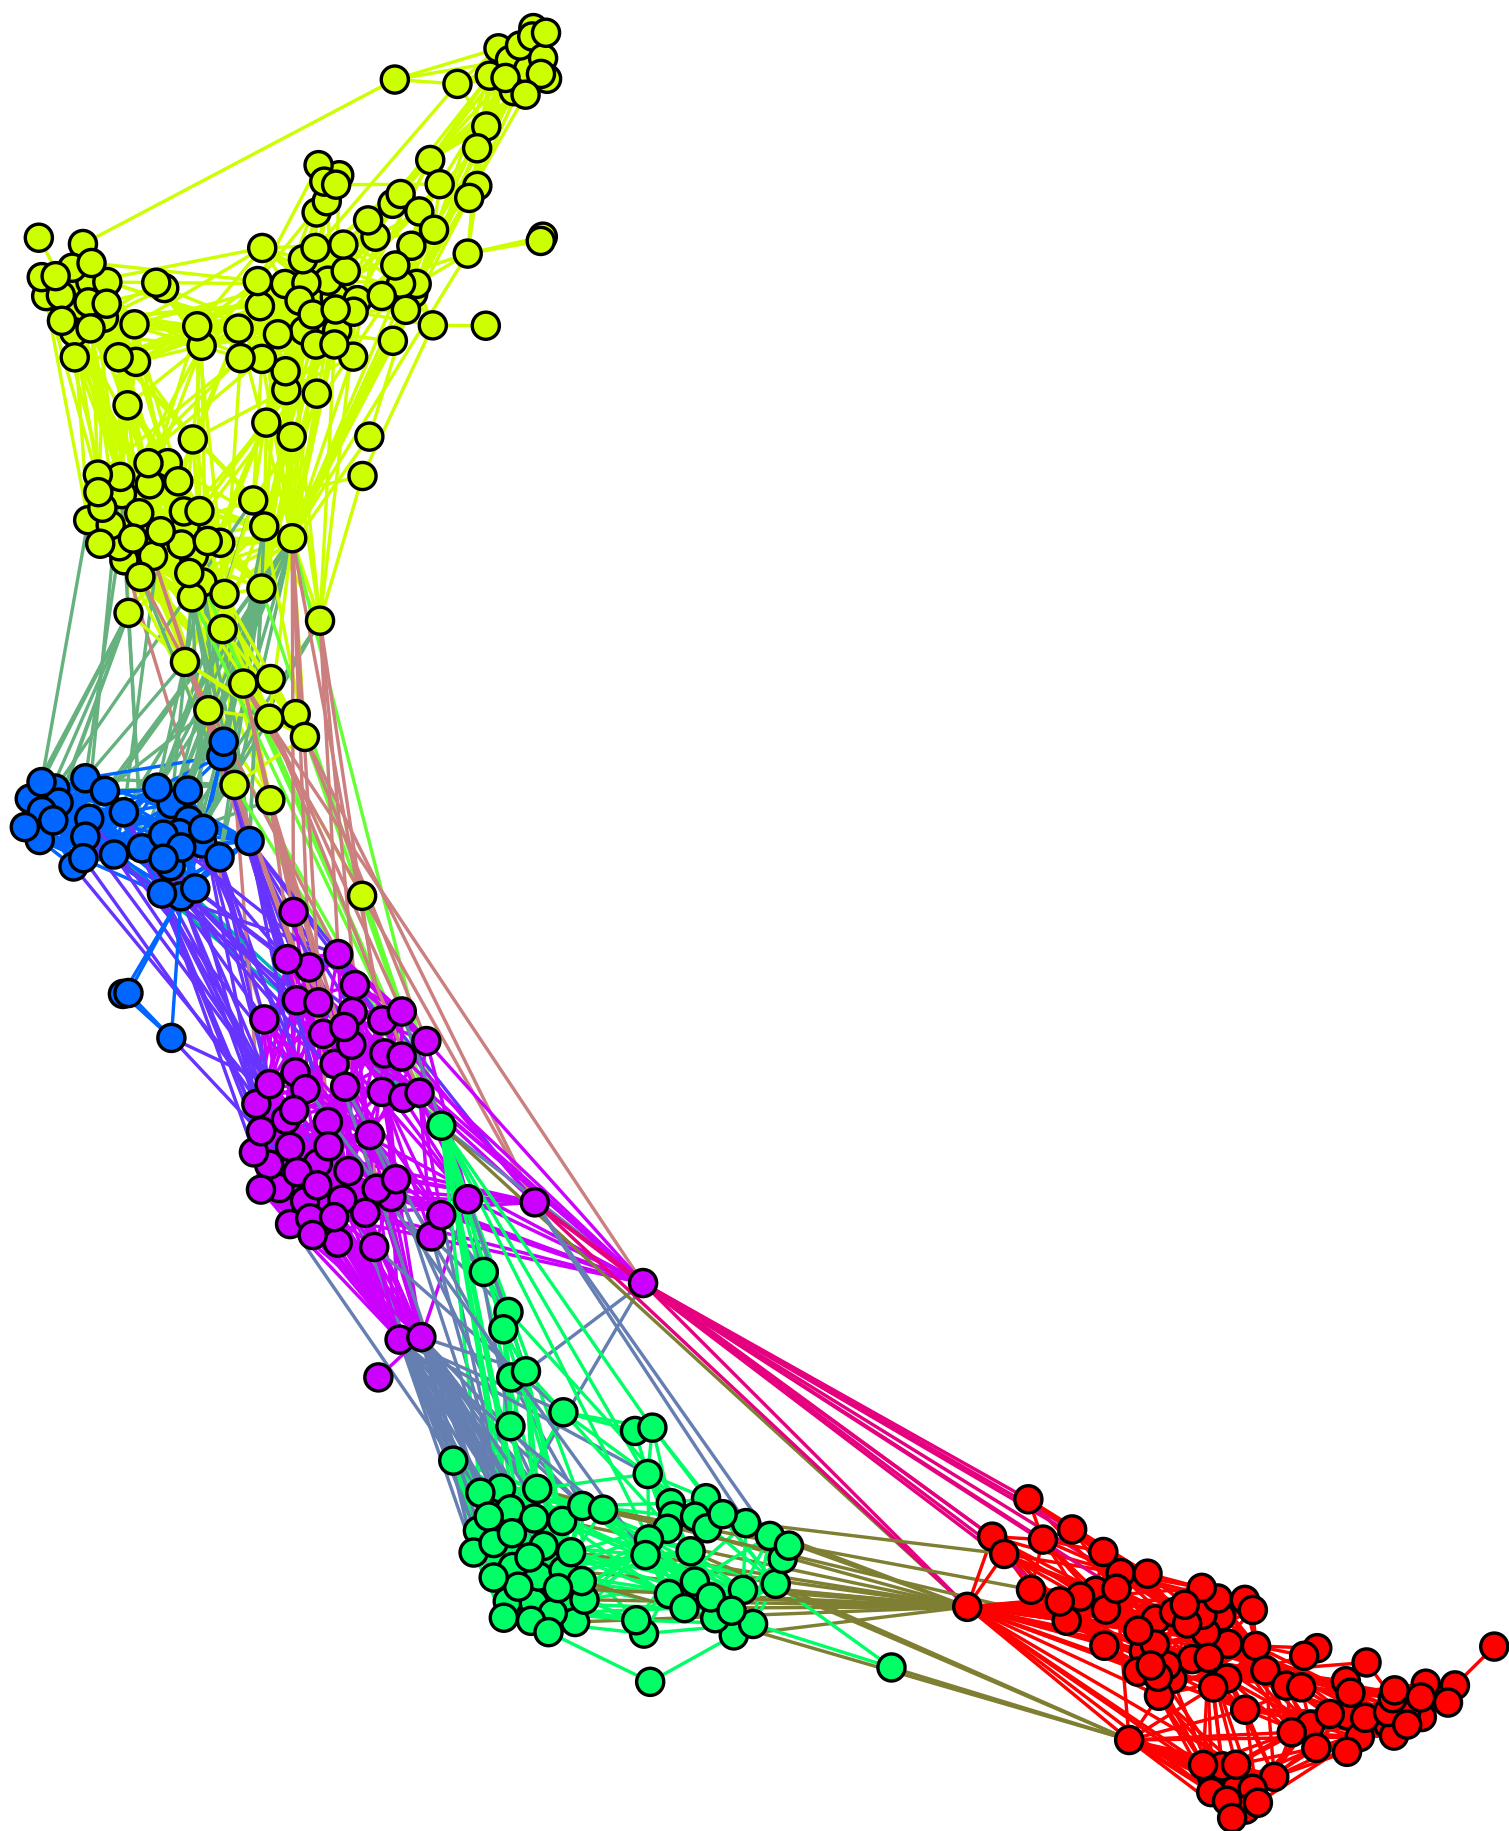

Supplement: MOESM1 [file 11901716]

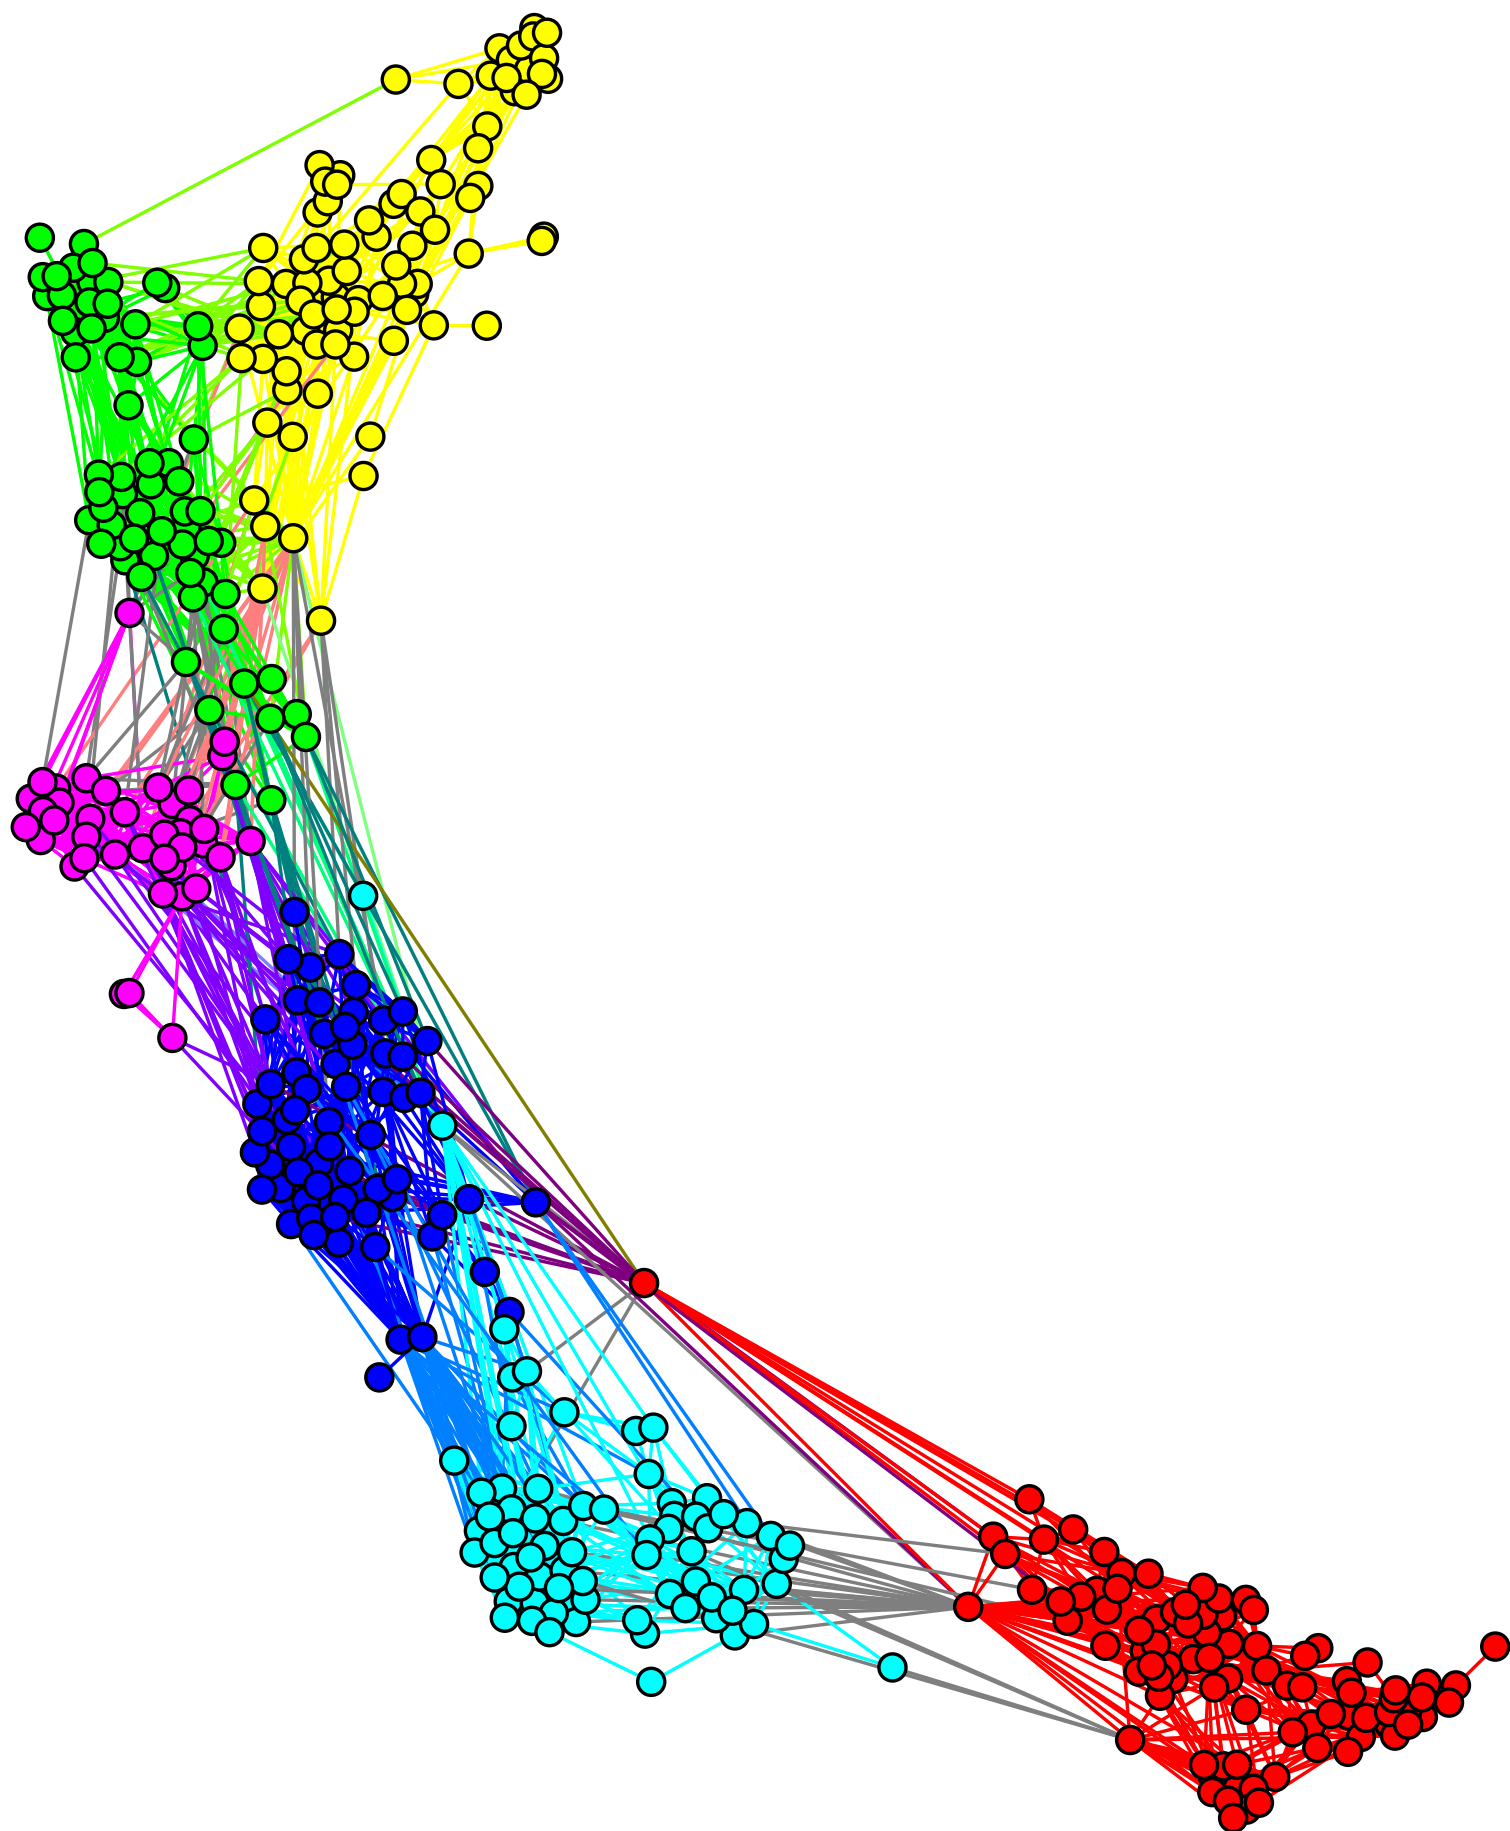

Supplement: MOESM1 [file 11901716]

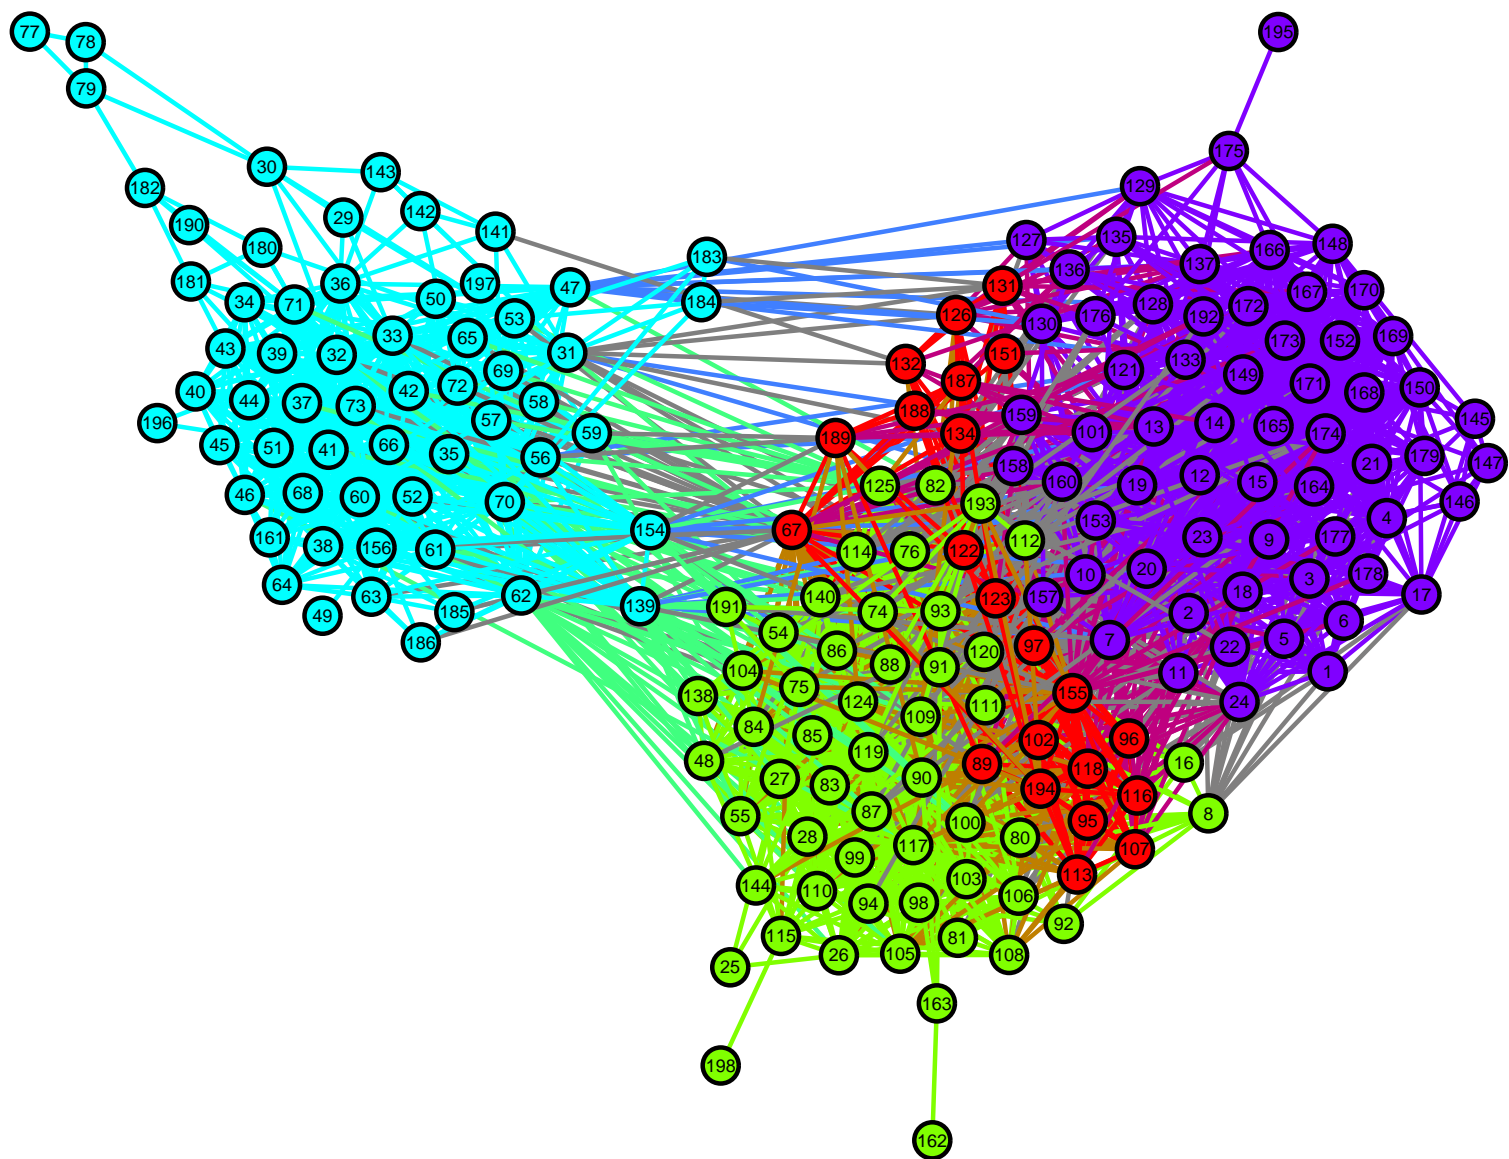

Supplement: MOESM1 [file 11901716]

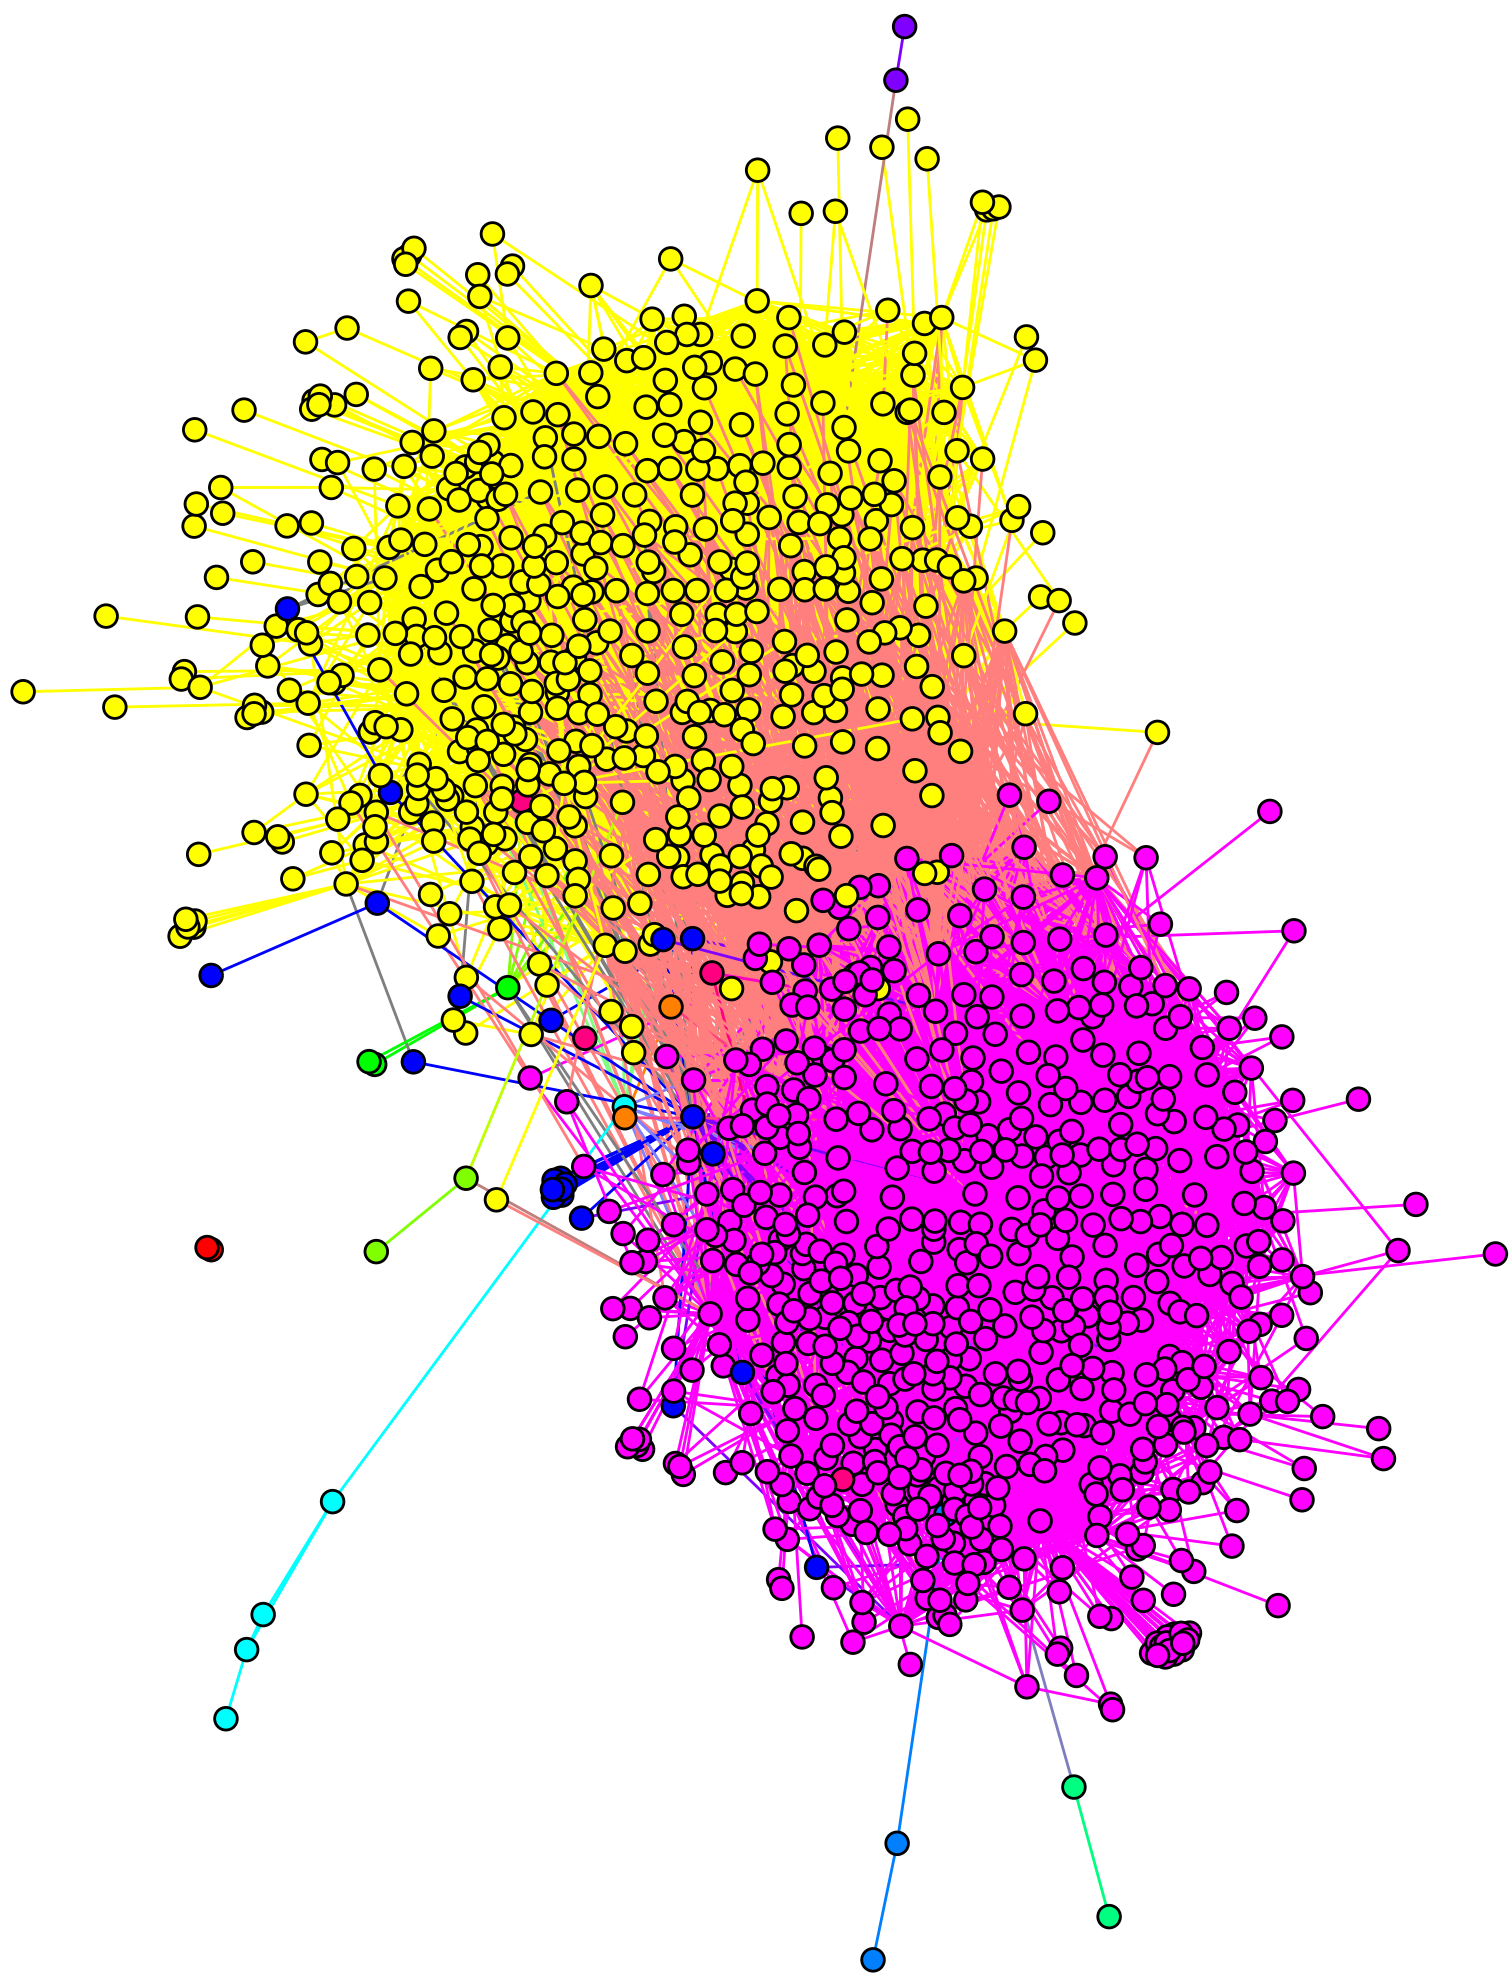

Supplement: MOESM1 [file 11901716]

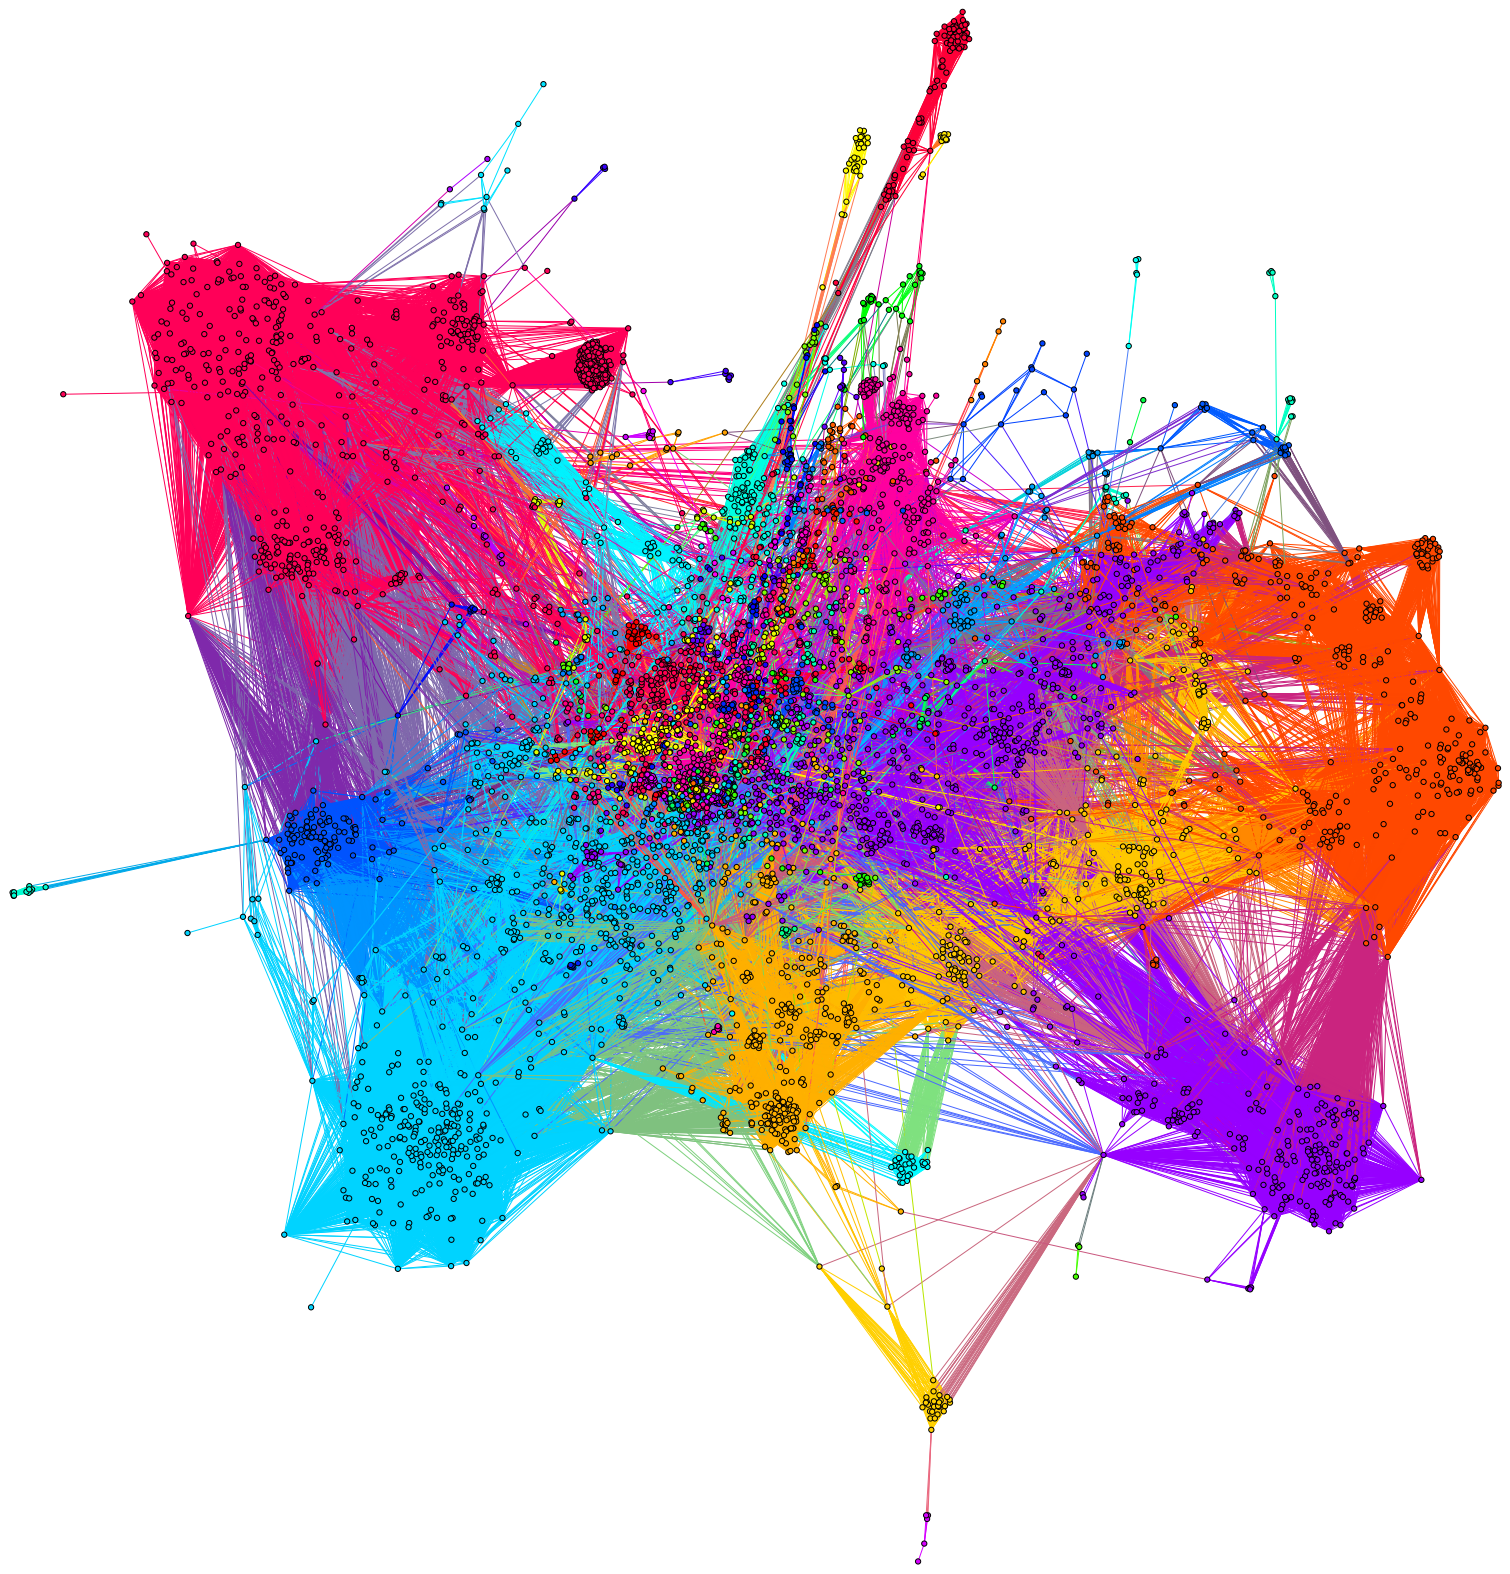

Supplement: MOESM1 [file 11901716]

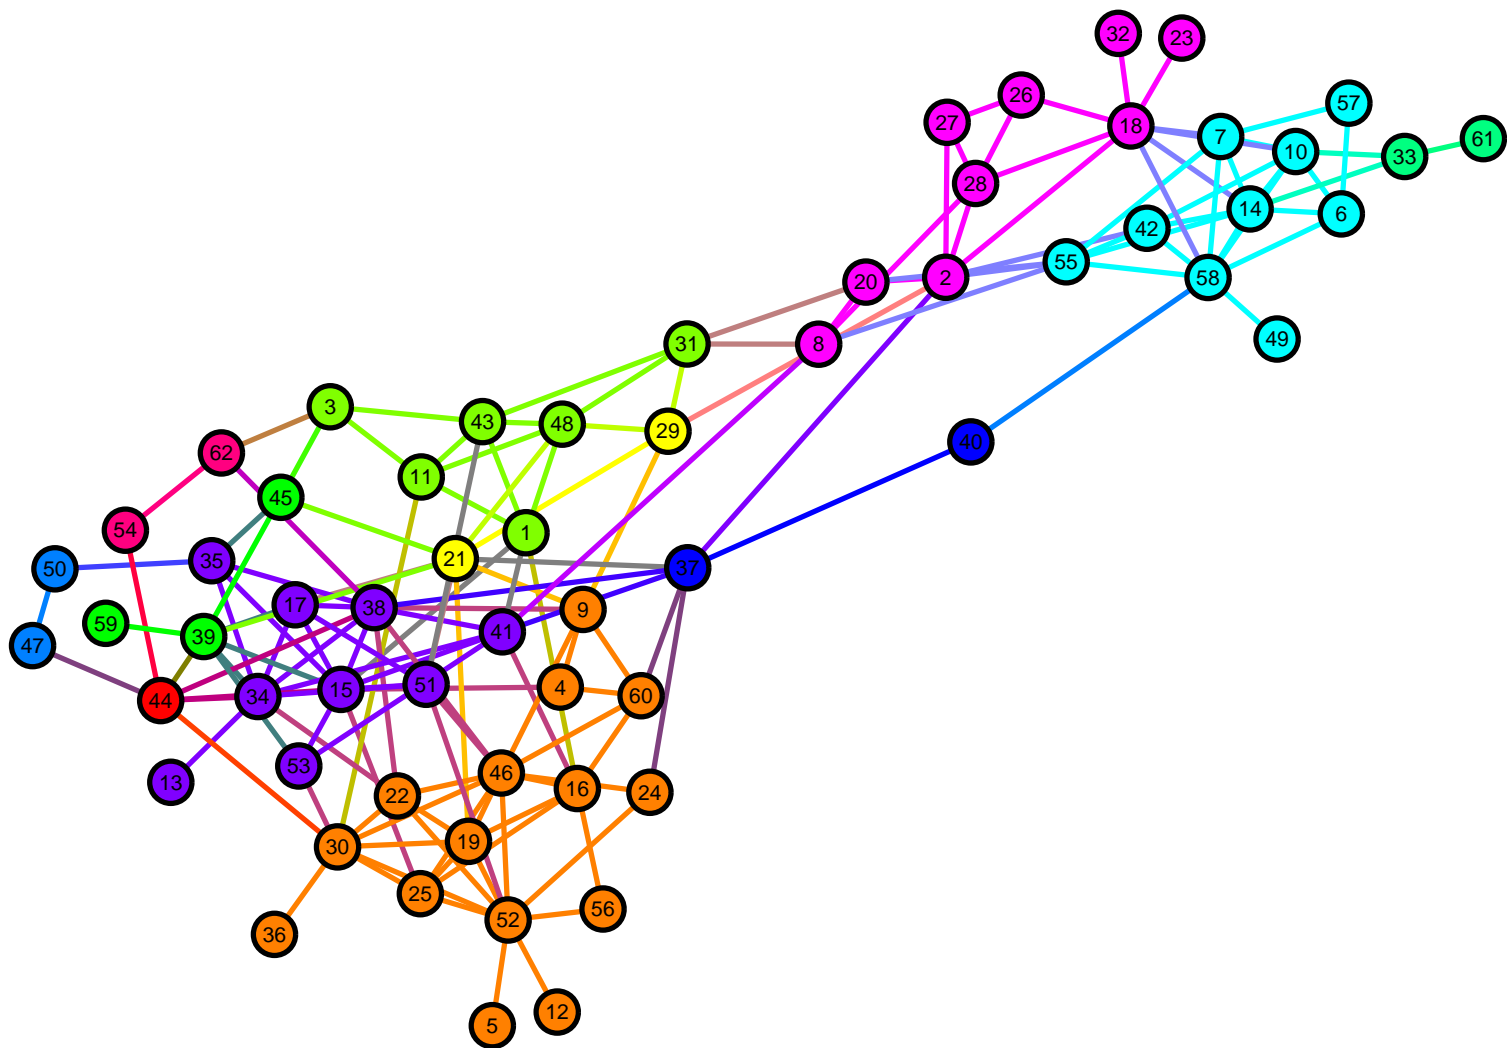

Supplement: MOESM1 [file 11901716]

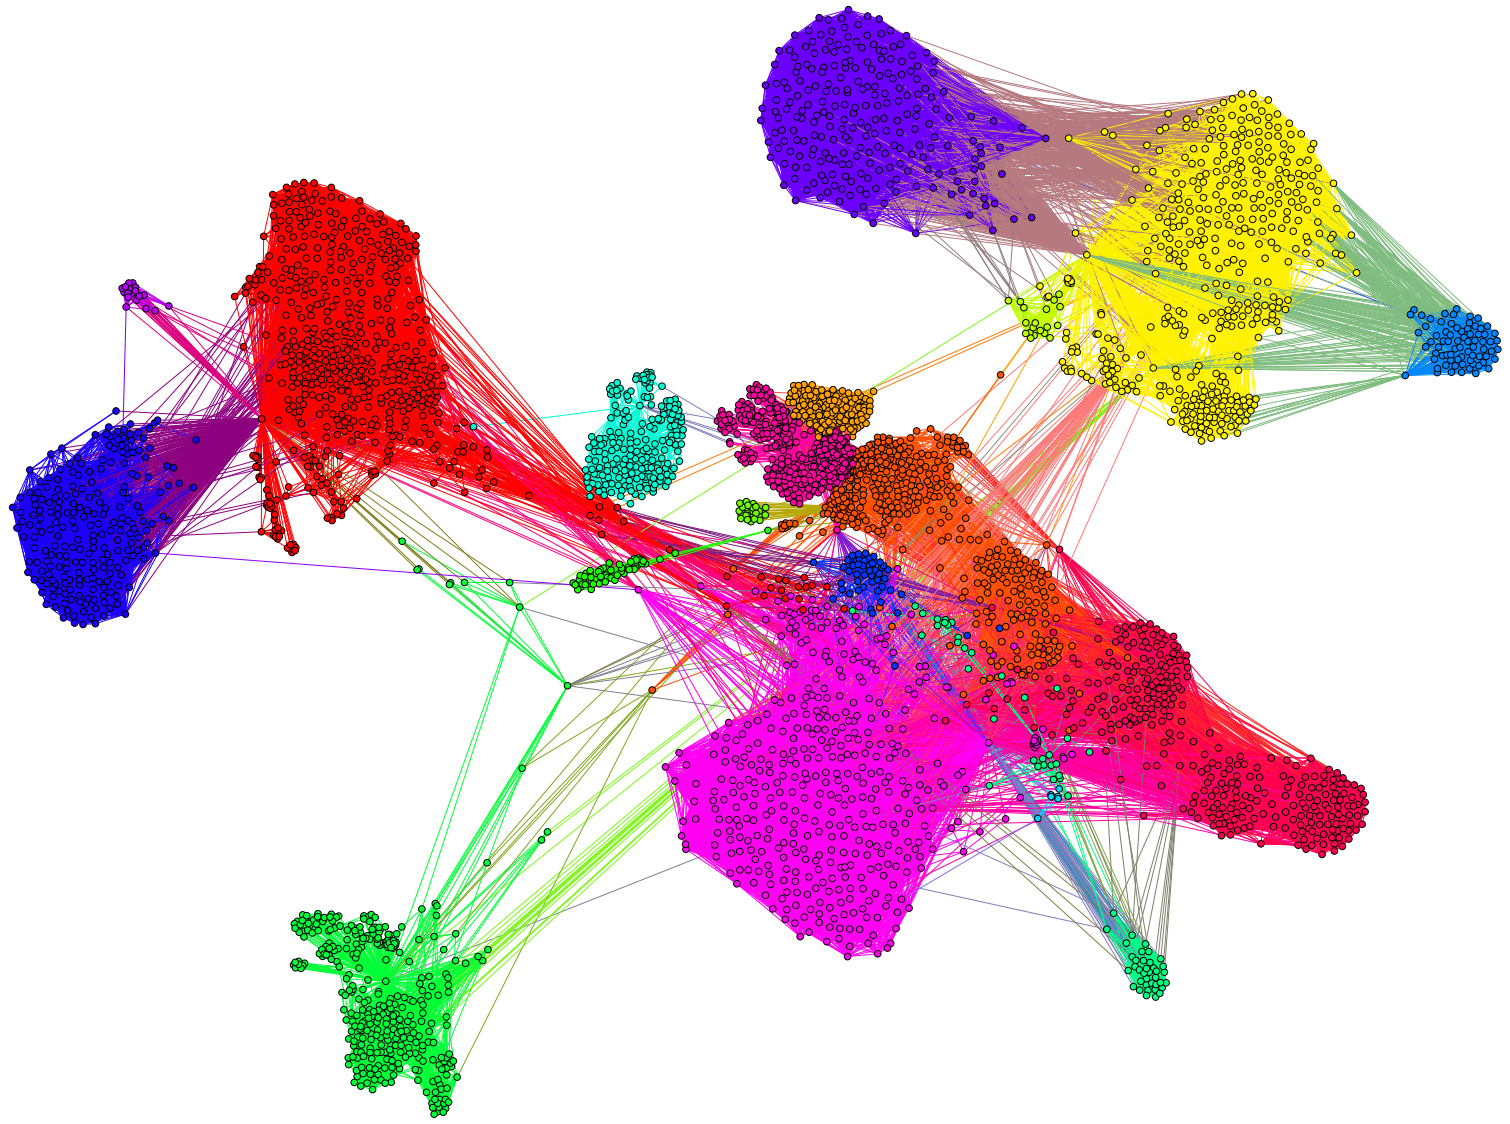

Supplement: MOESM1 [file 11901716]

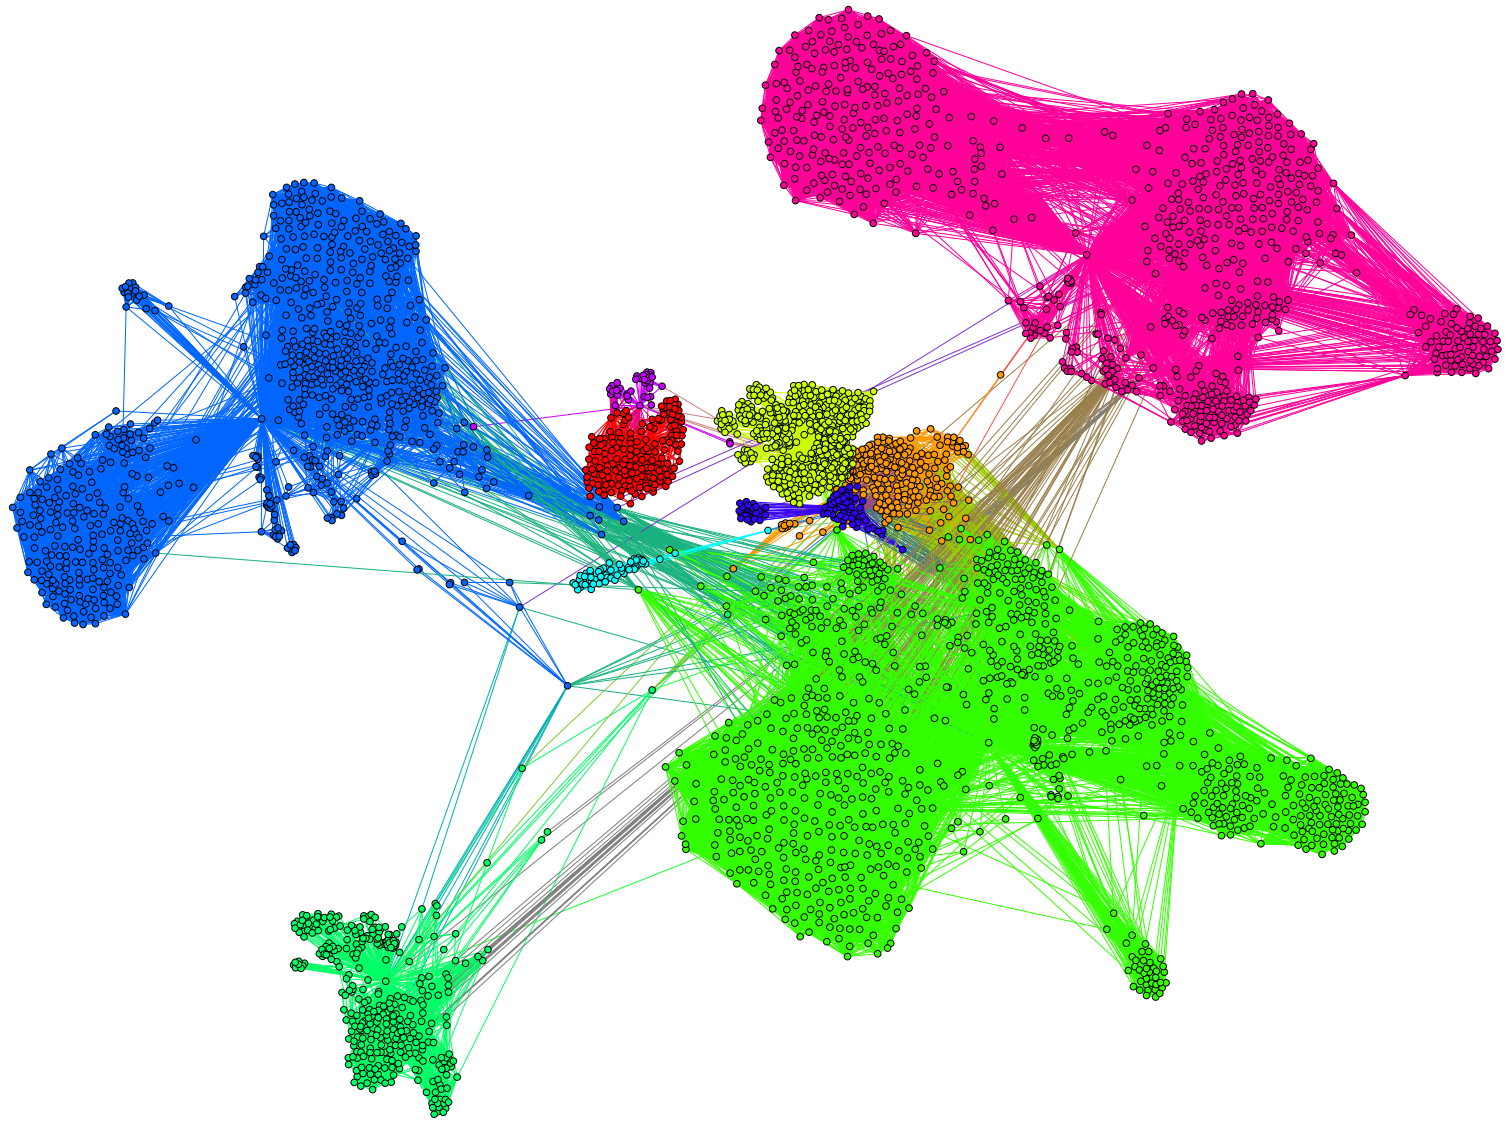

Supplement: MOESM1 [file 11901716]

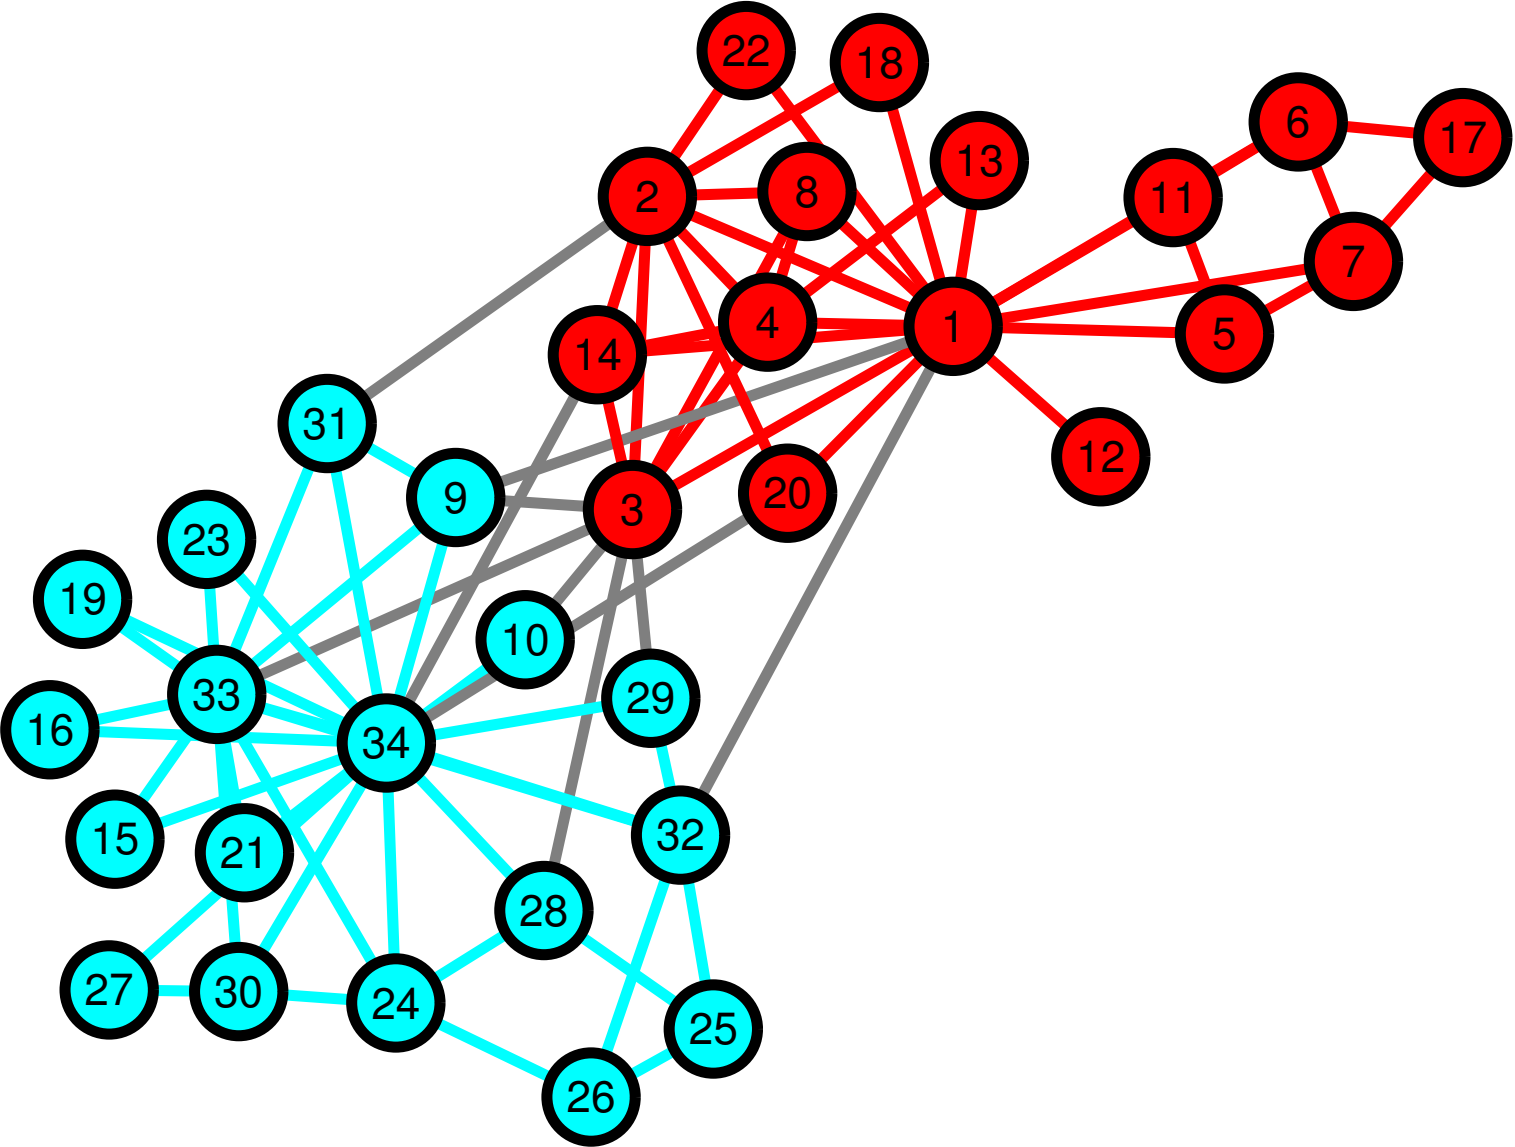

Supplement: MOESM1 [file 11901716]

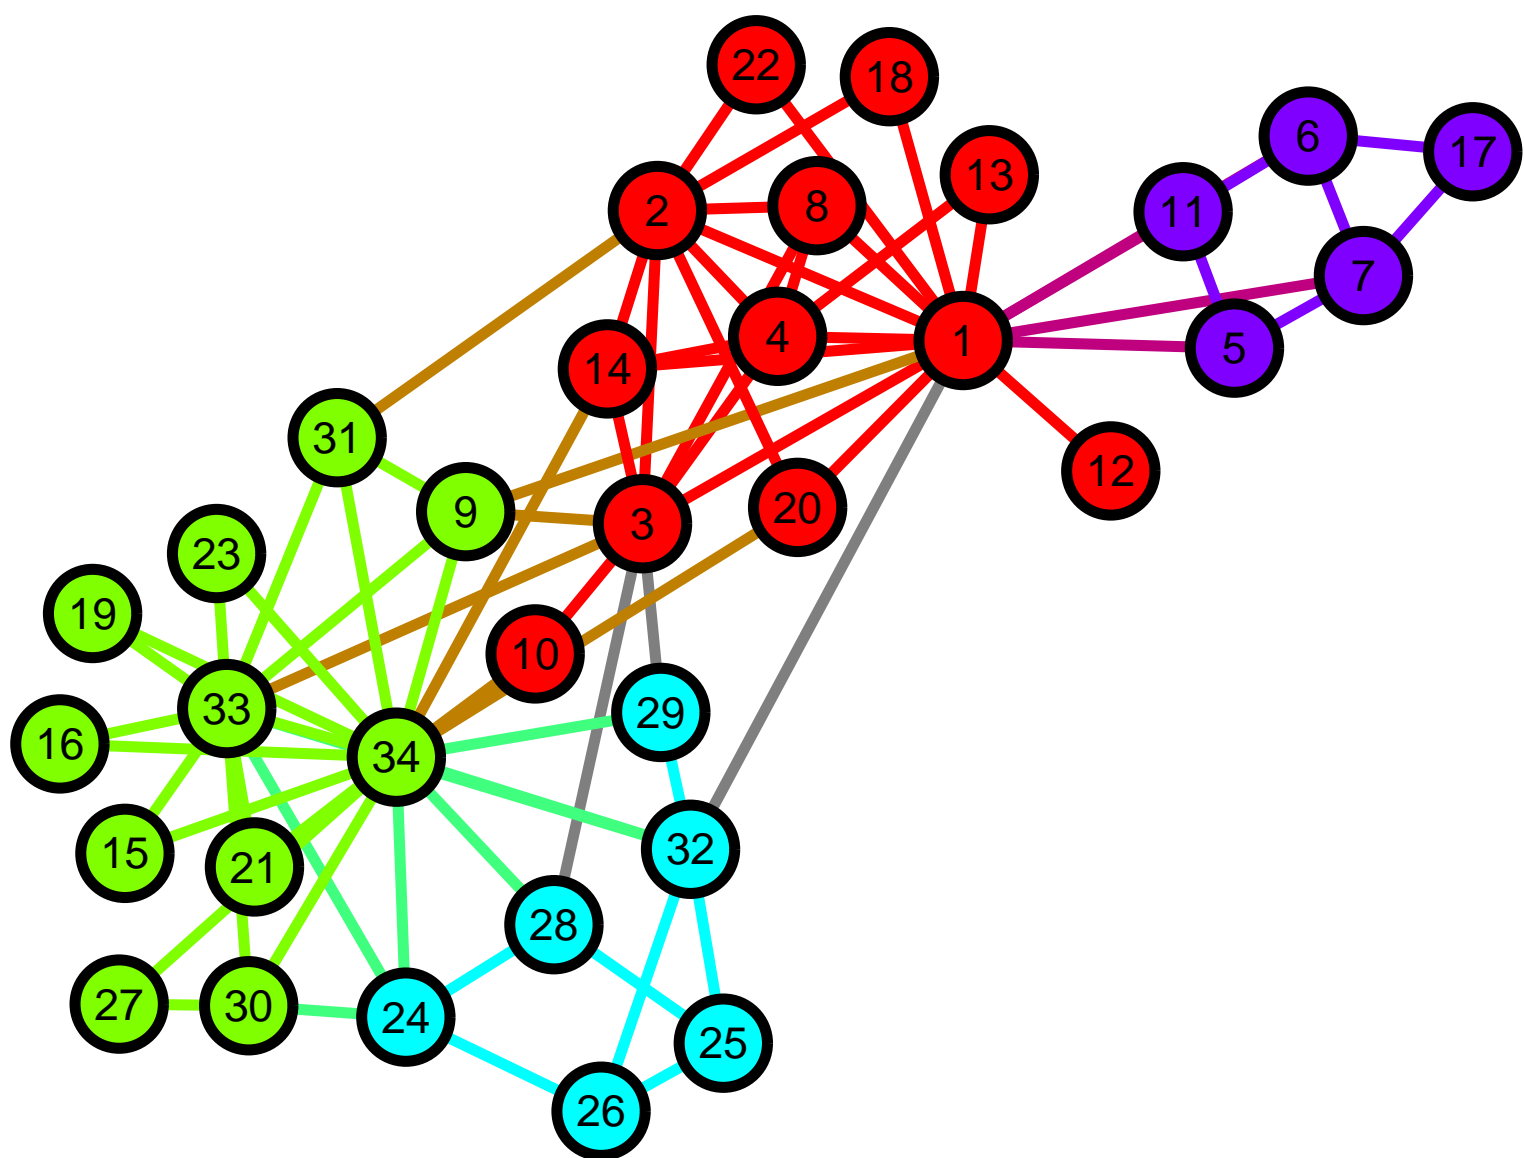

Supplement: MOESM1 [file 11901716]

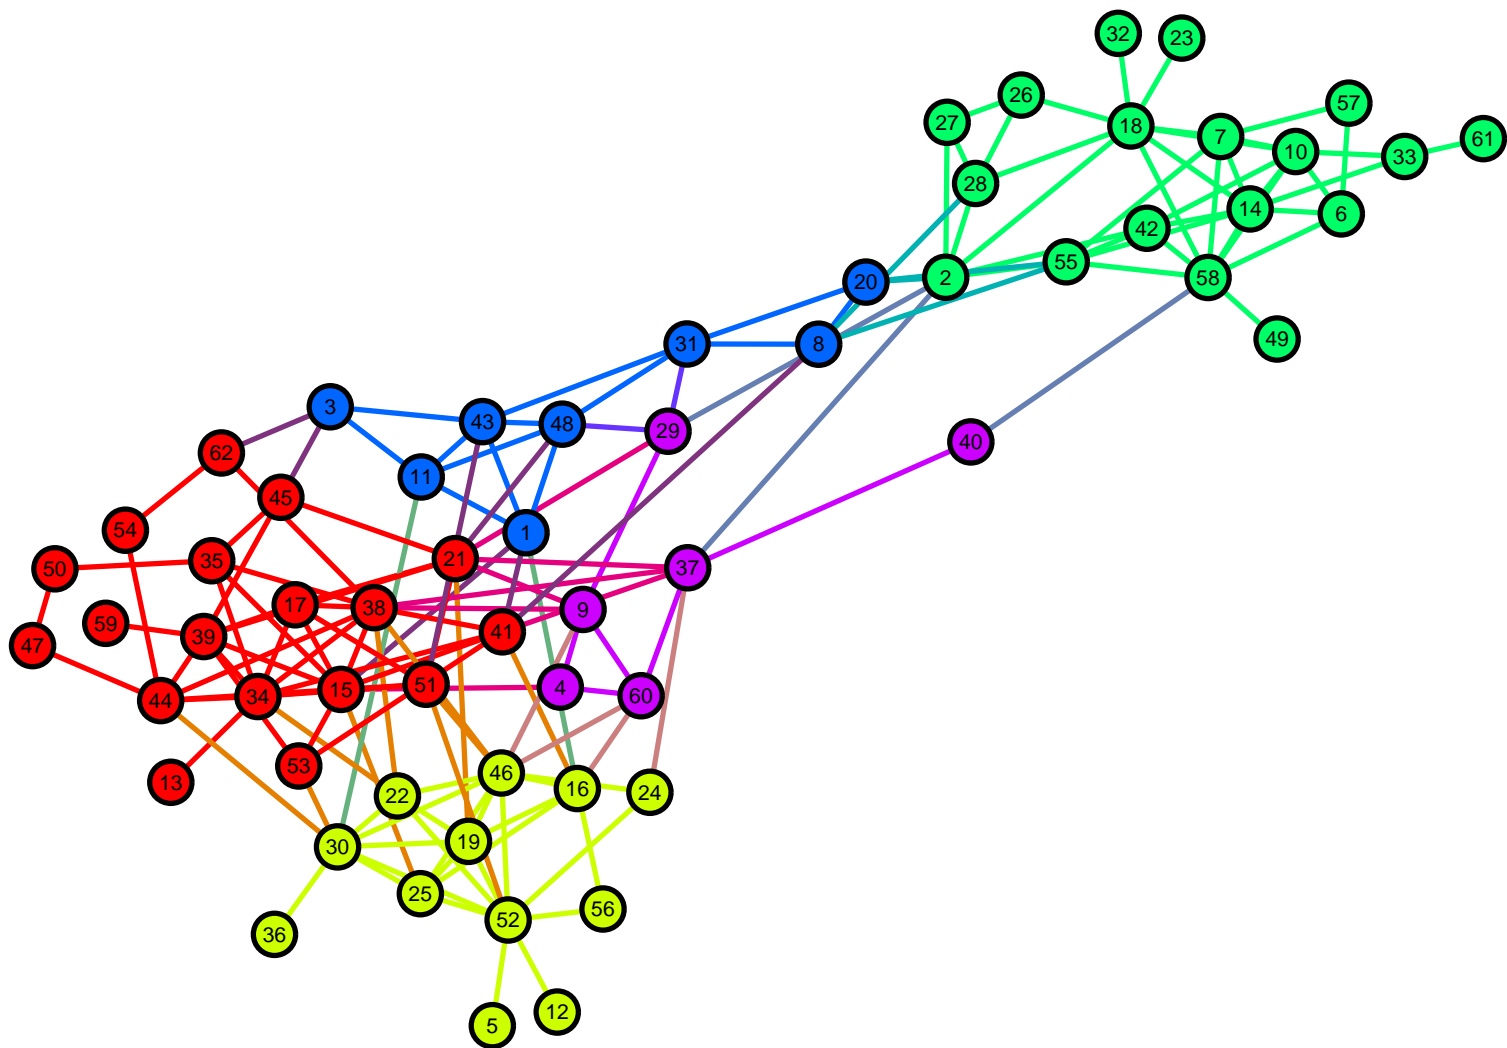

Supplement: MOESM1 [file 11901716]

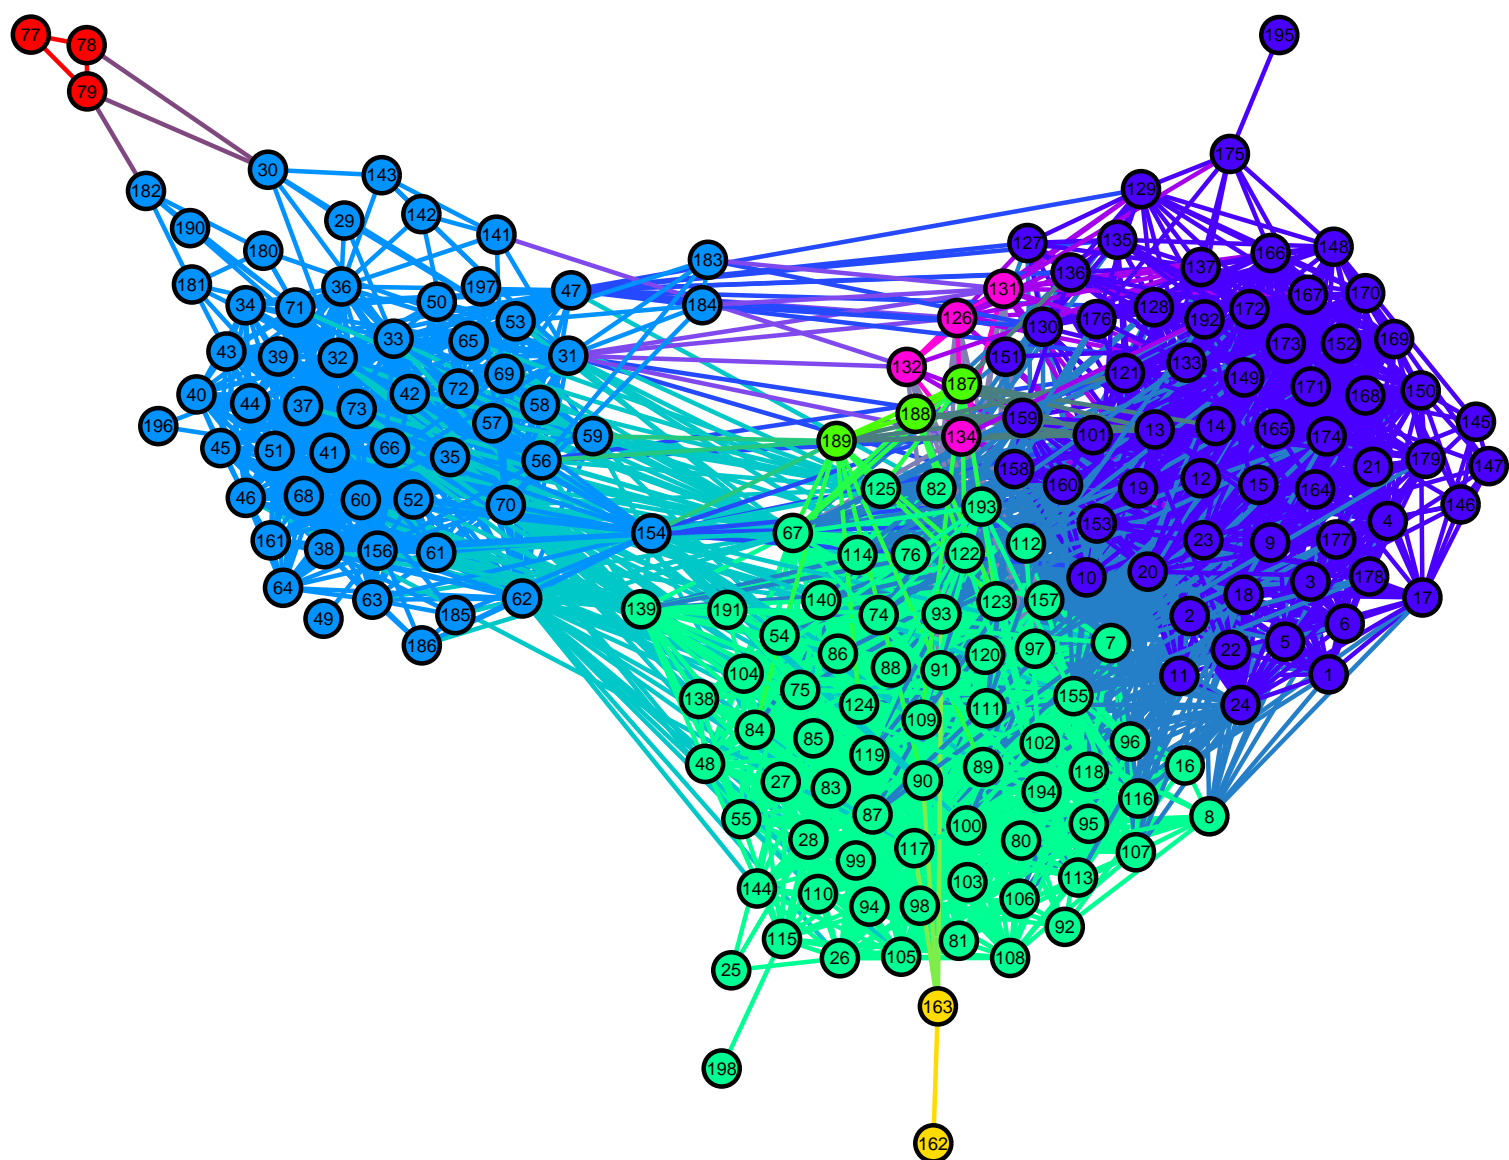

Supplement: MOESM1 [file 11901716]

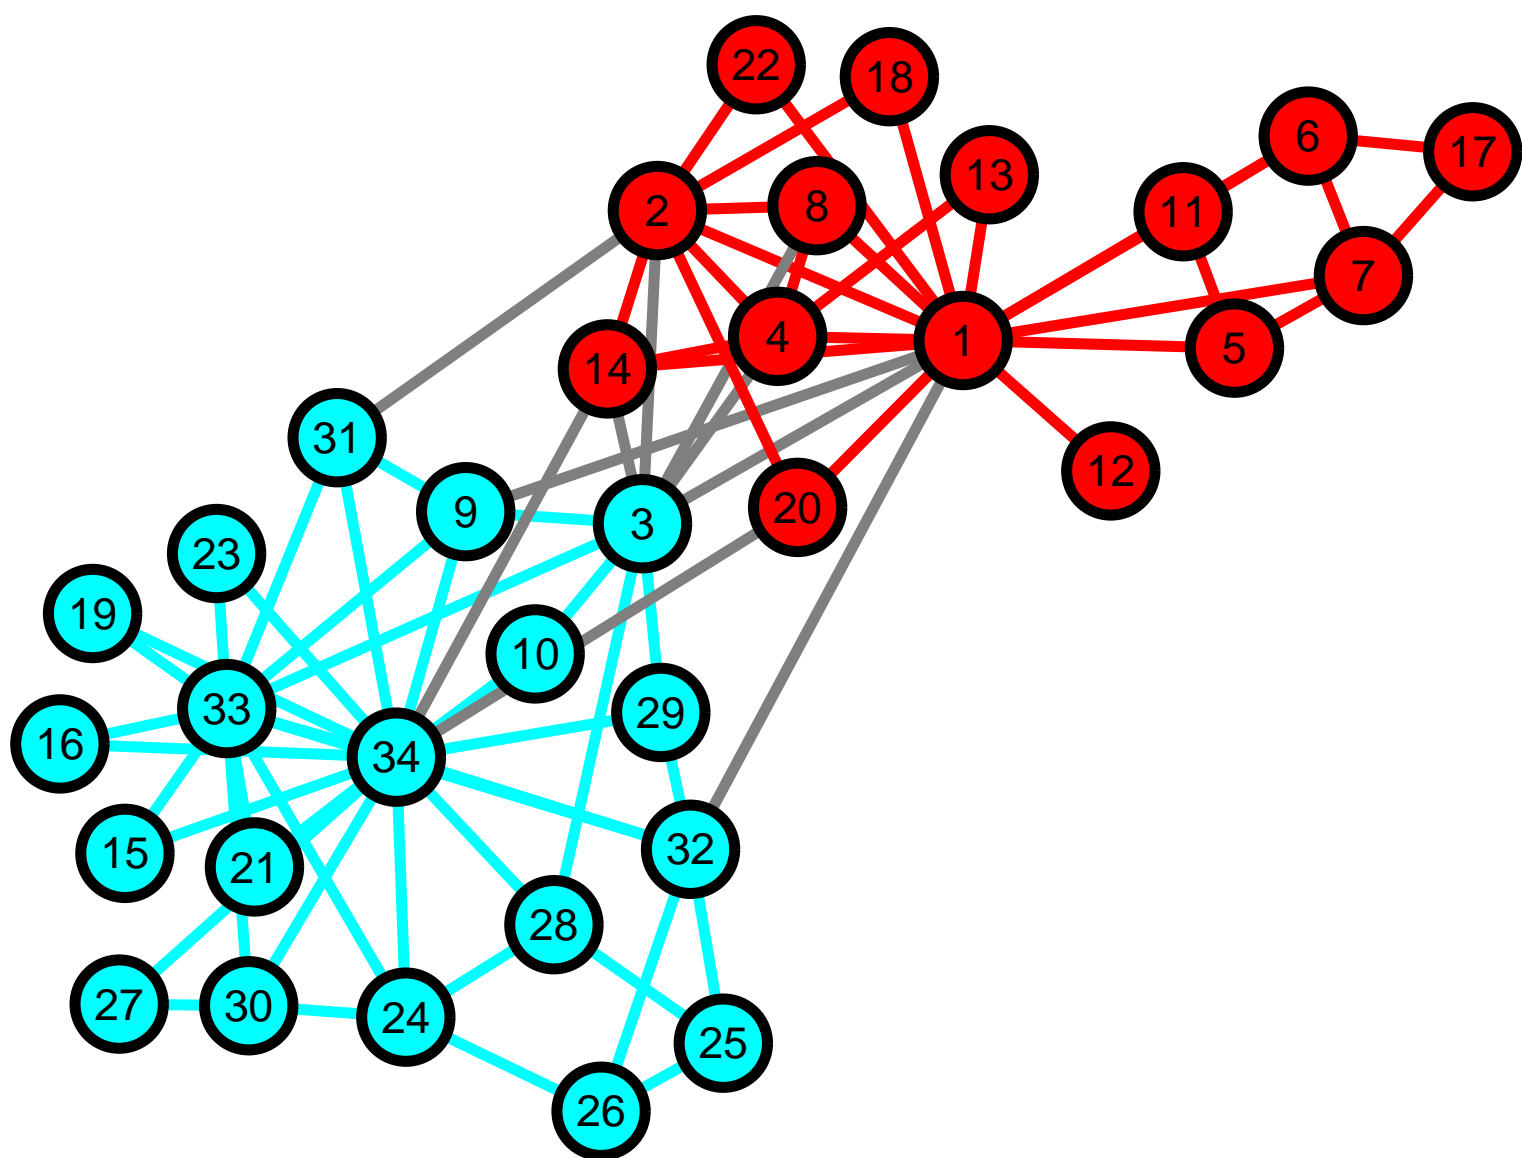

Supplement: MOESM1 [file 11901716]

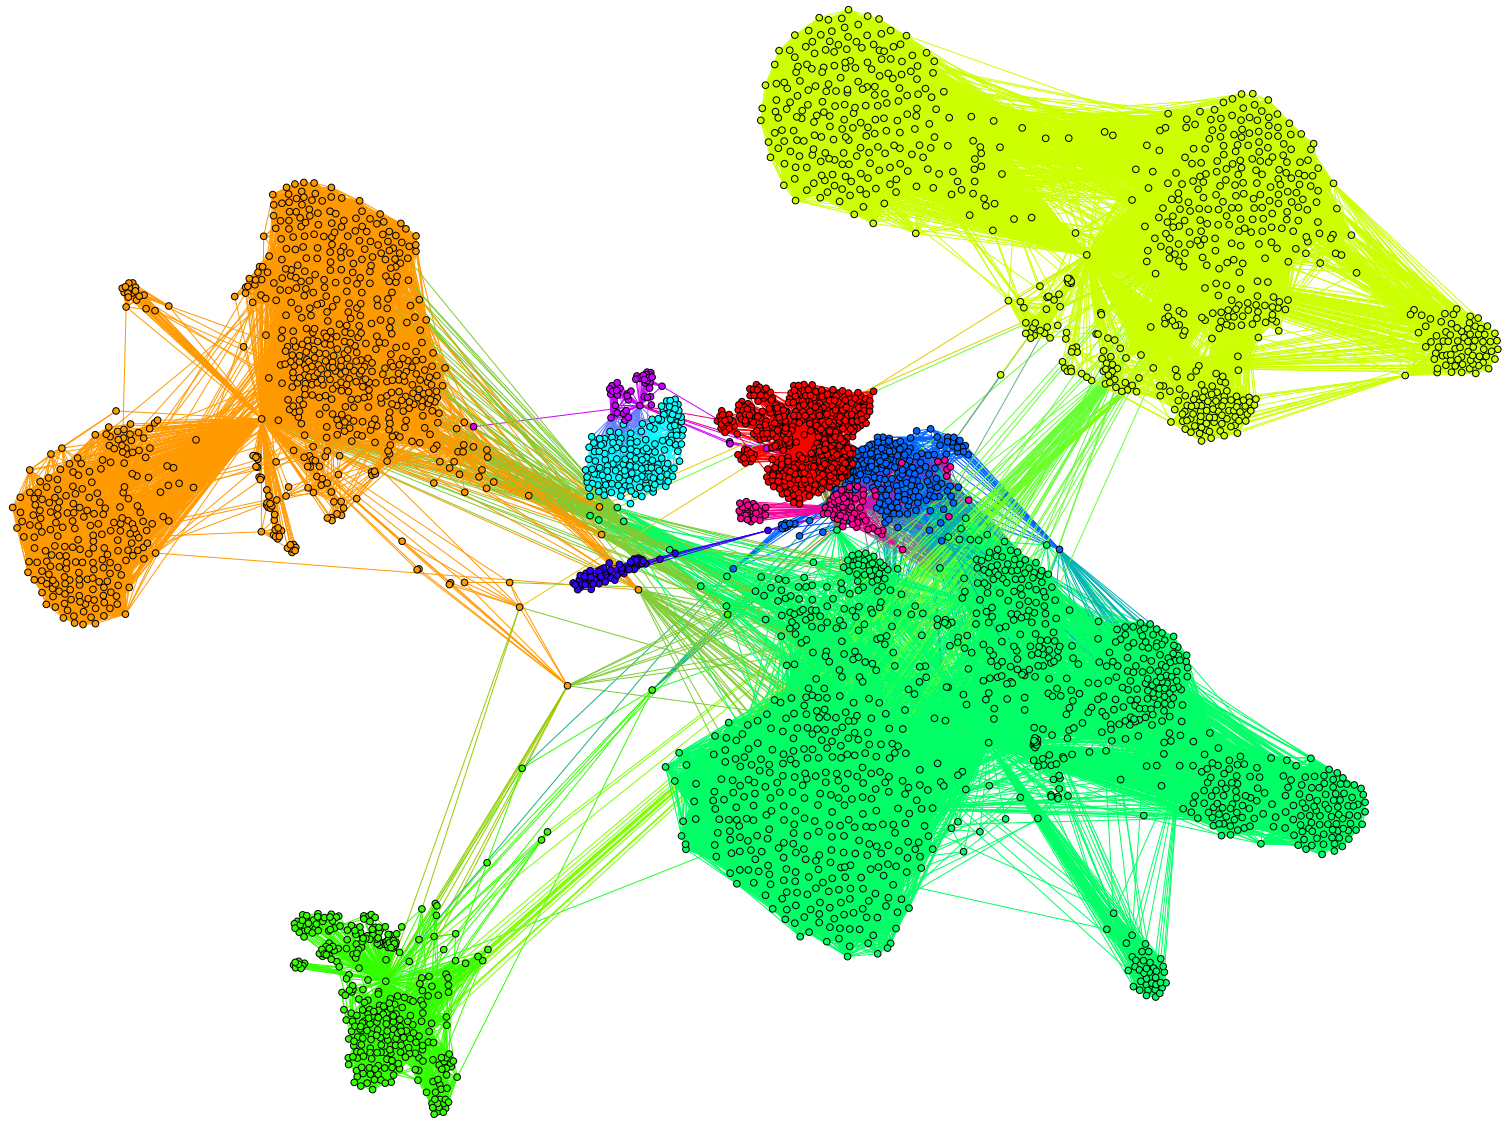

Supplement: MOESM1 [file 11901716]

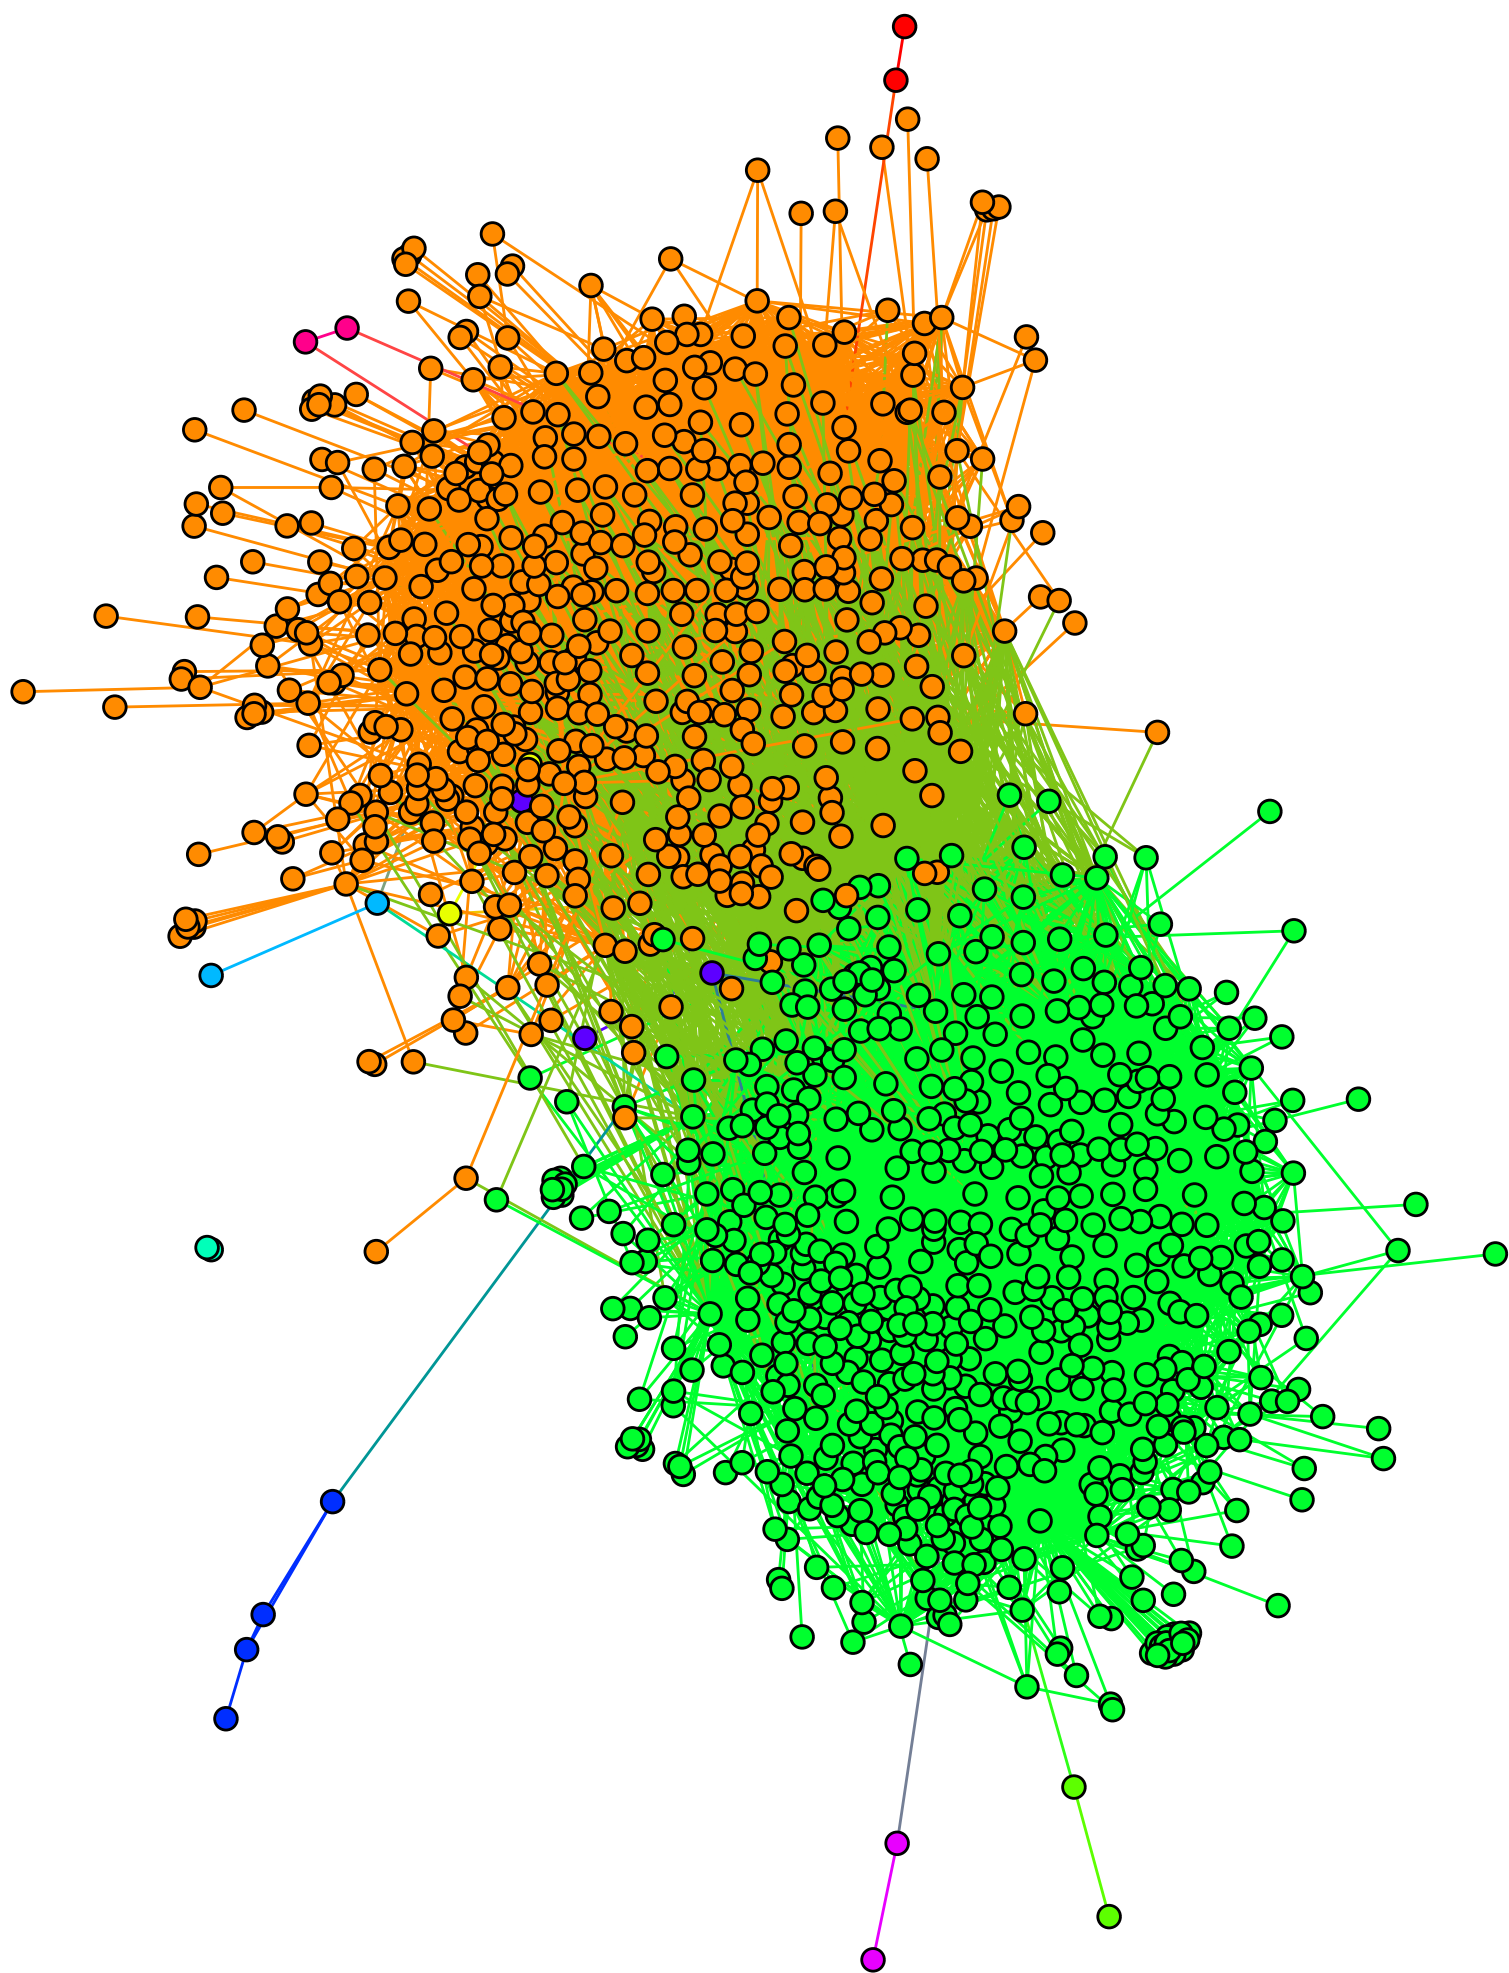

Supplement: MOESM1 [file 11901716]

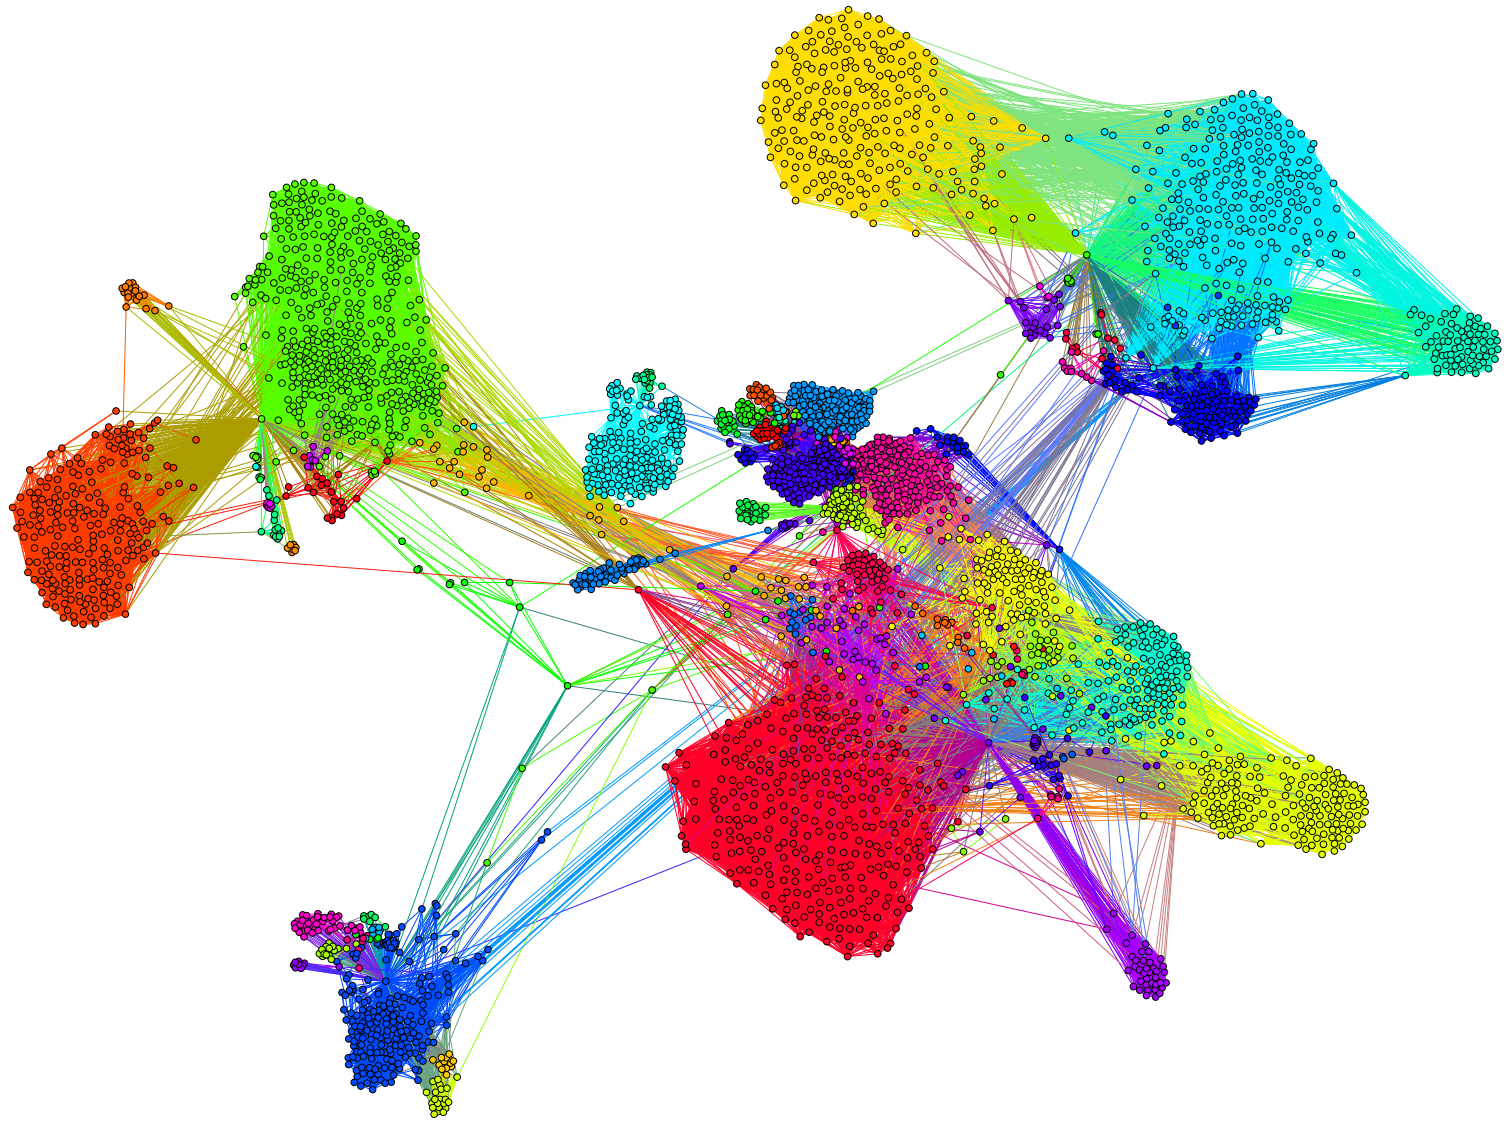

Supplement: MOESM1 [file 11901716]

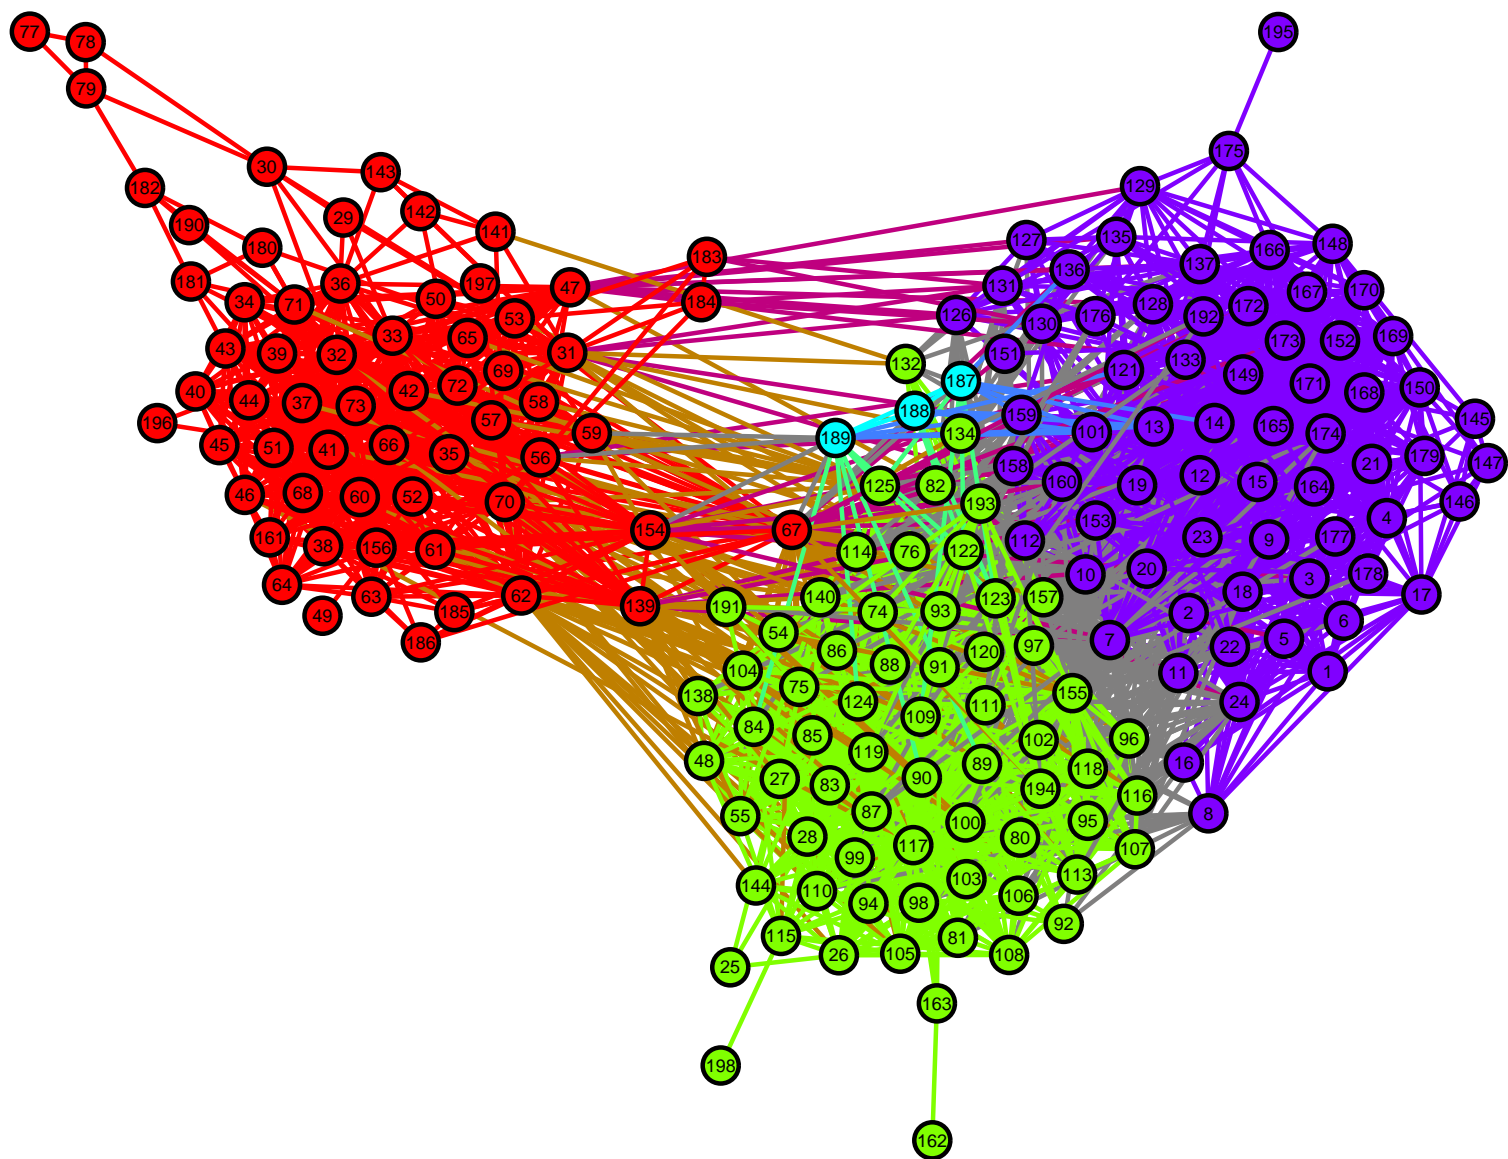

Supplement: MOESM1 [file 11901716]
